# Supplementary material
Source: PubMed Central journal article supplement (PMC3199298)
Supplement: NIHMS293752-supplement-01.pdf [file NIHMS293752-supplement-01.pdf]

## SUPPLEMENTAL MATERIALS

### **Site-specific proteomic analysis of lipoxidation adducts in cardiac mitochondria reveals chemical diversity of 2-alkenal adduction**

Juan Chavez<sup>1</sup>, Jianyong Wu<sup>1</sup>, William Bisson<sup>2</sup> and Claudia S. Maier<sup>1\*</sup>

<sup>1</sup>Departments of Chemistry, and <sup>2</sup>Environmental and Molecular Toxicology,  
Oregon State University, Corvallis, Oregon 97331

Figure S1-77: Mass spectral data for the peptides identified with 2-alkenal adductions.

Figure S78: Proposed structures of ARP-specific ions observed in the MS/MS spectra reported.

Figure S79: Biological network and pathway analysis of the carbonylated proteins identified in this study.

# AT5F1\_RAT: ATP synthase B chain

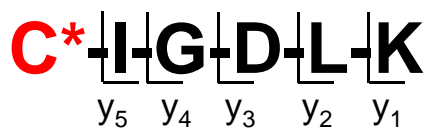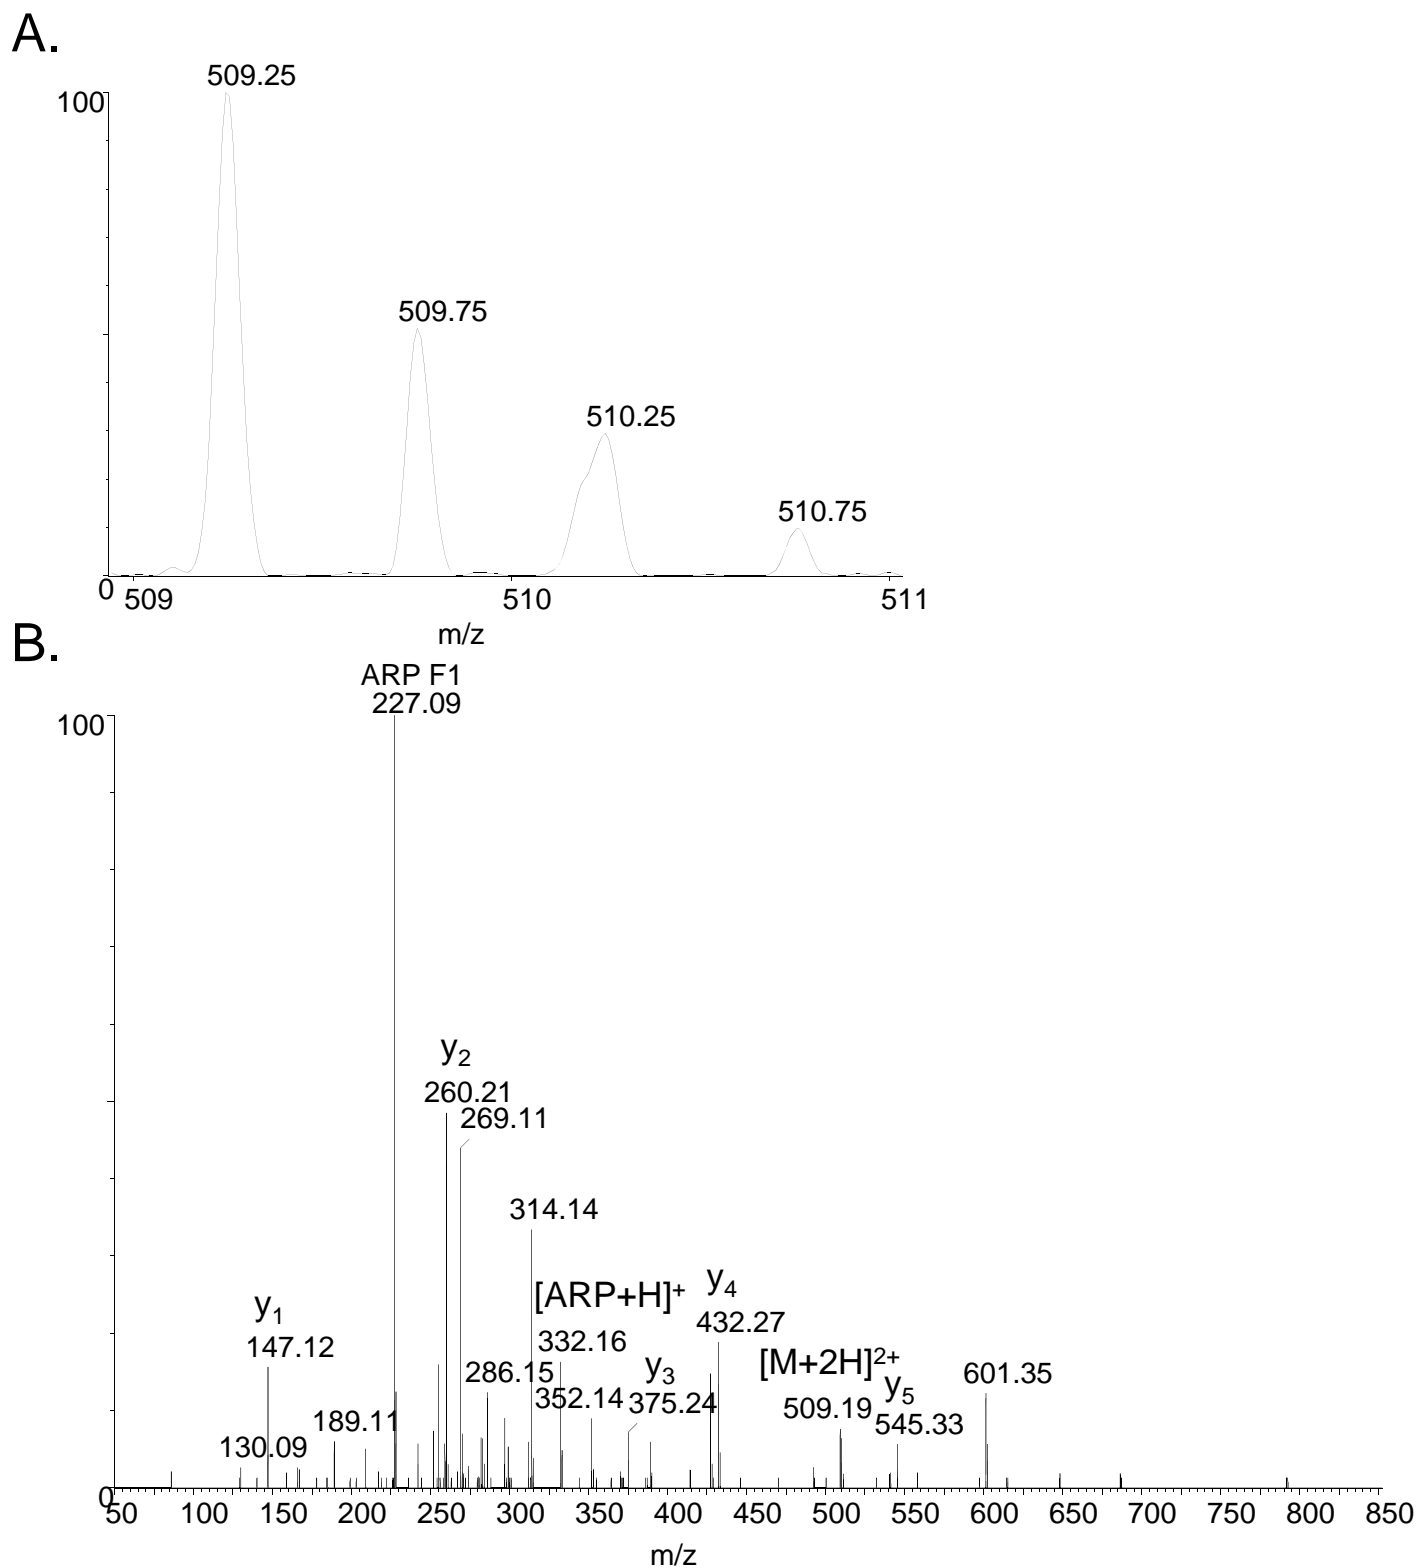

**Figure S1.** (A) Full mass spectrum and (B) MS/MS spectrum acquired by ESI-Q-TOF of the  $[M+2H]^{2+}$  ion of the ARP labeled, acrolein modified peptide C\*IGDLK; monoisotopic  $m/z_{\text{calc}}$  509.25; accuracy  $\Delta(m/z) = 0.00$  Da

# AT5F1\_RAT: ATP synthase B chain

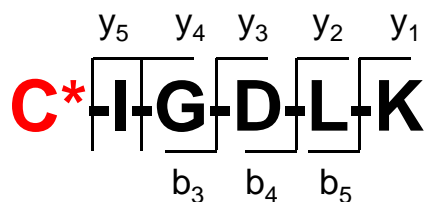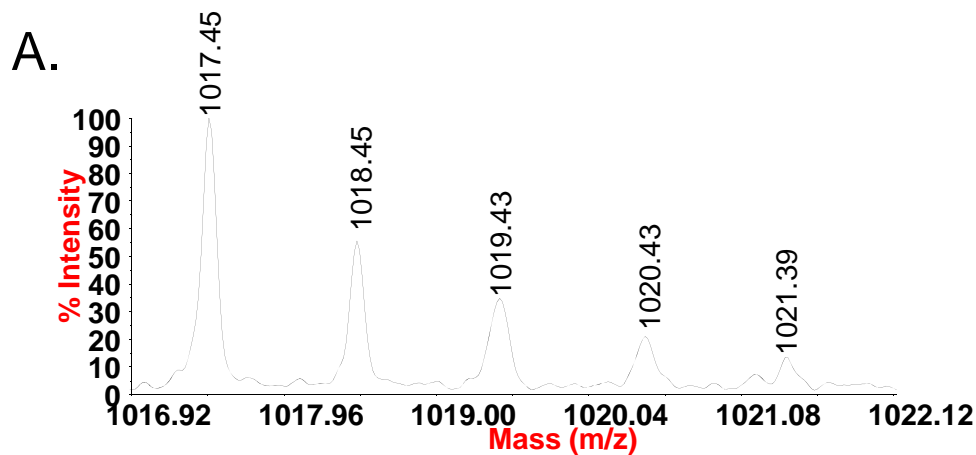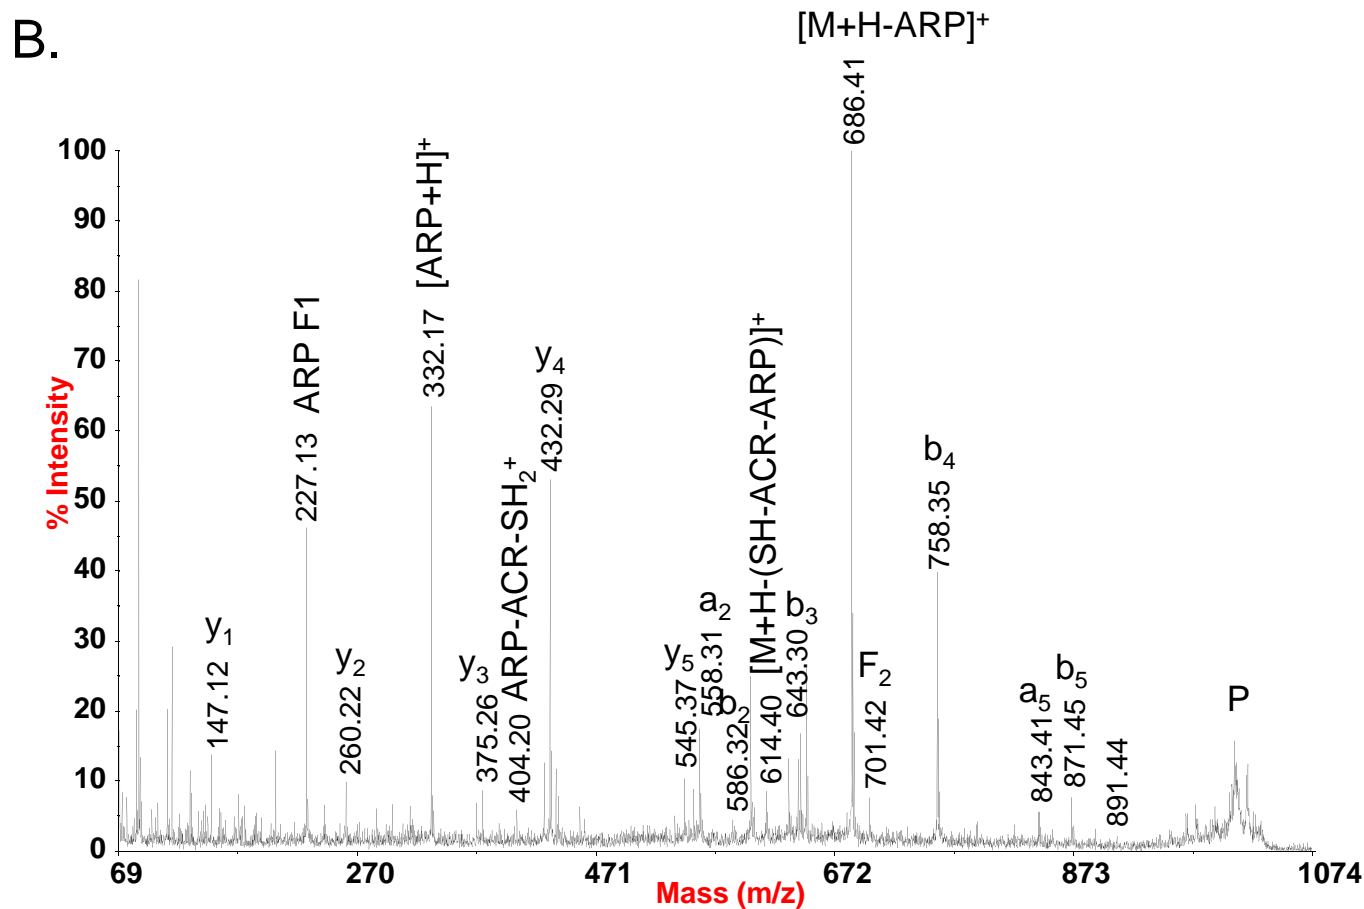

**Figure S2.** (A) Full mass spectrum and (B) MS/MS spectrum acquired by MALDI-TOF/TOF of the [M+H]<sup>+</sup> ion of the ARP labeled, acrolein modified peptide C\*IGDLK; monoisotopic m/z<sub>calc</sub> 1017.49; accuracy Δ(m/z) = -0.04 Da

# ATP5H\_RAT: ATP synthase D chain

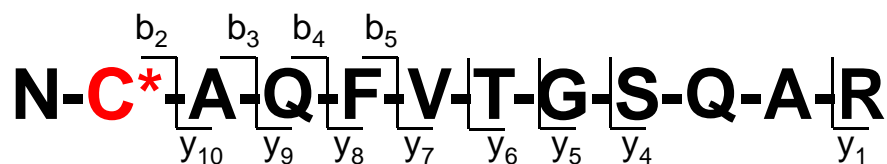

A.

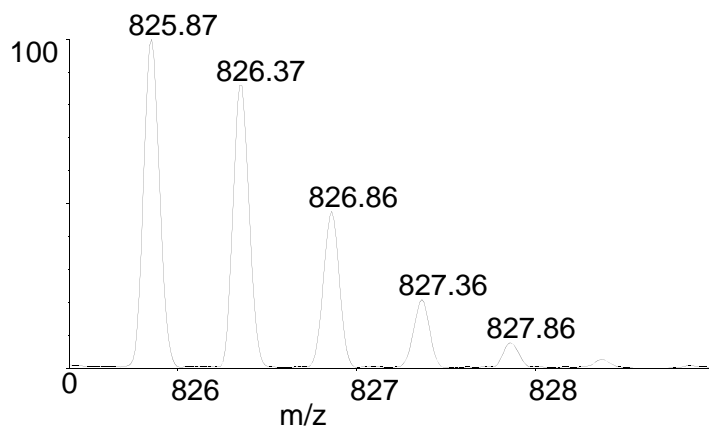

B.

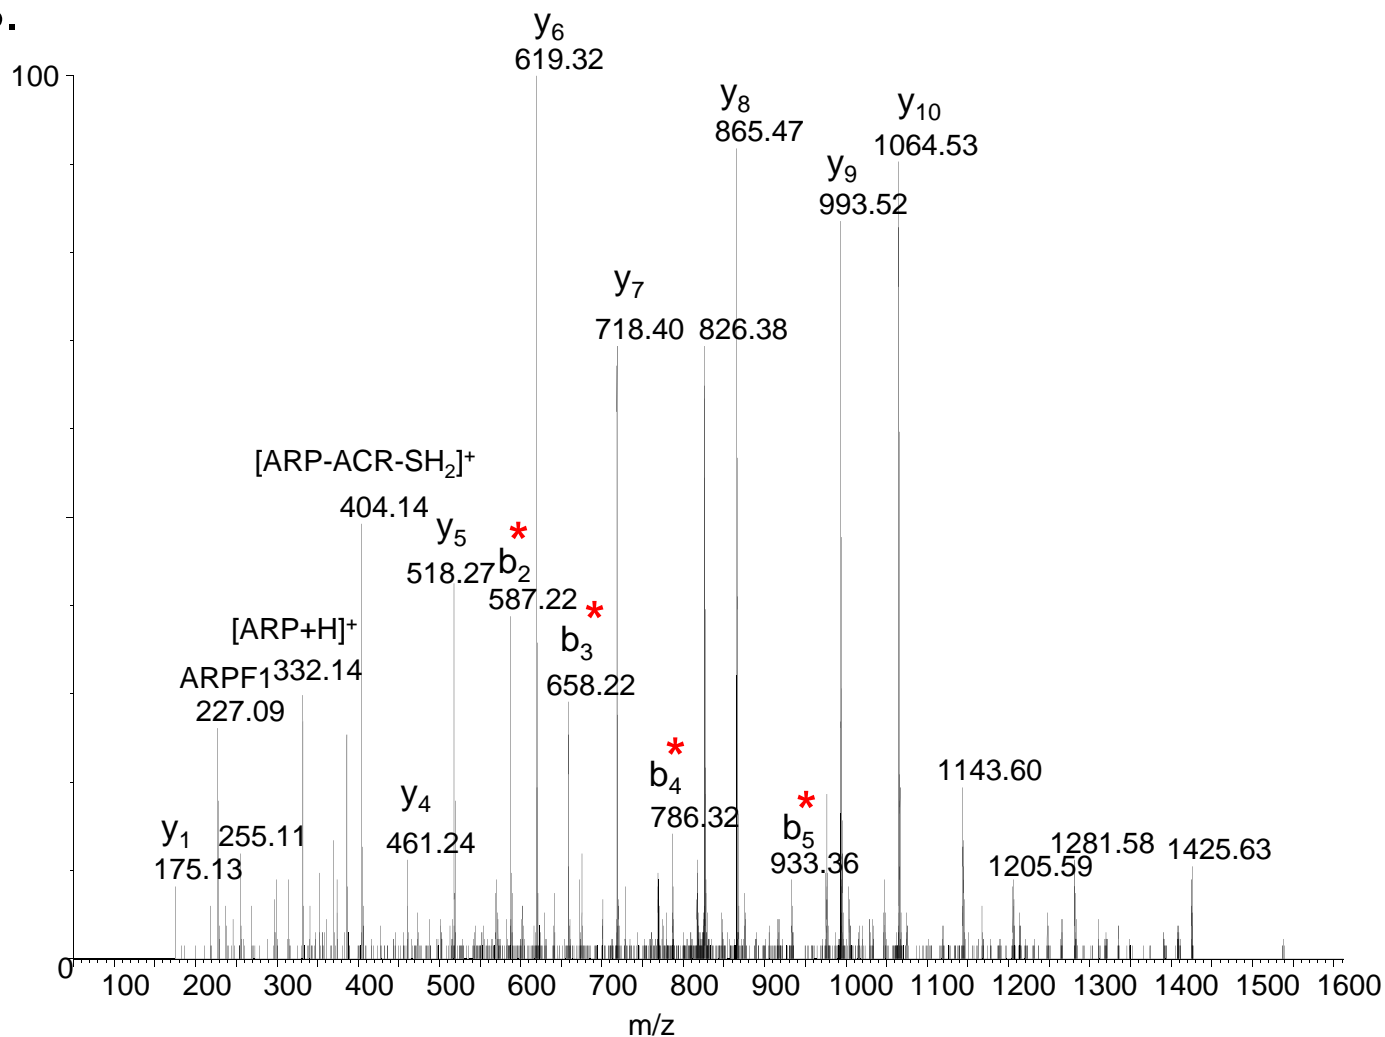

**Figure S3.** (A) Full mass spectrum and (B) MS/MS spectrum acquired by ESI-Q-TOF of the  $[M+2H]^{2+}$  ion of the ARP labeled, acrolein modified peptide NC<sup>\*</sup>AQFVTGSQAR; monoisotopic  $m/z_{\text{calc}}$  825.88; accuracy  $\Delta(m/z) = -0.01$  Da



# ATPA\_RAT ATP synthase subunit alpha

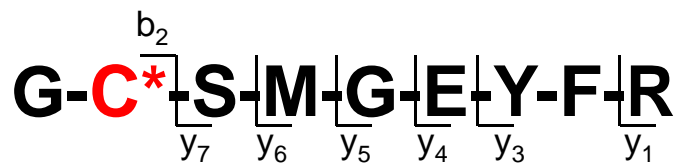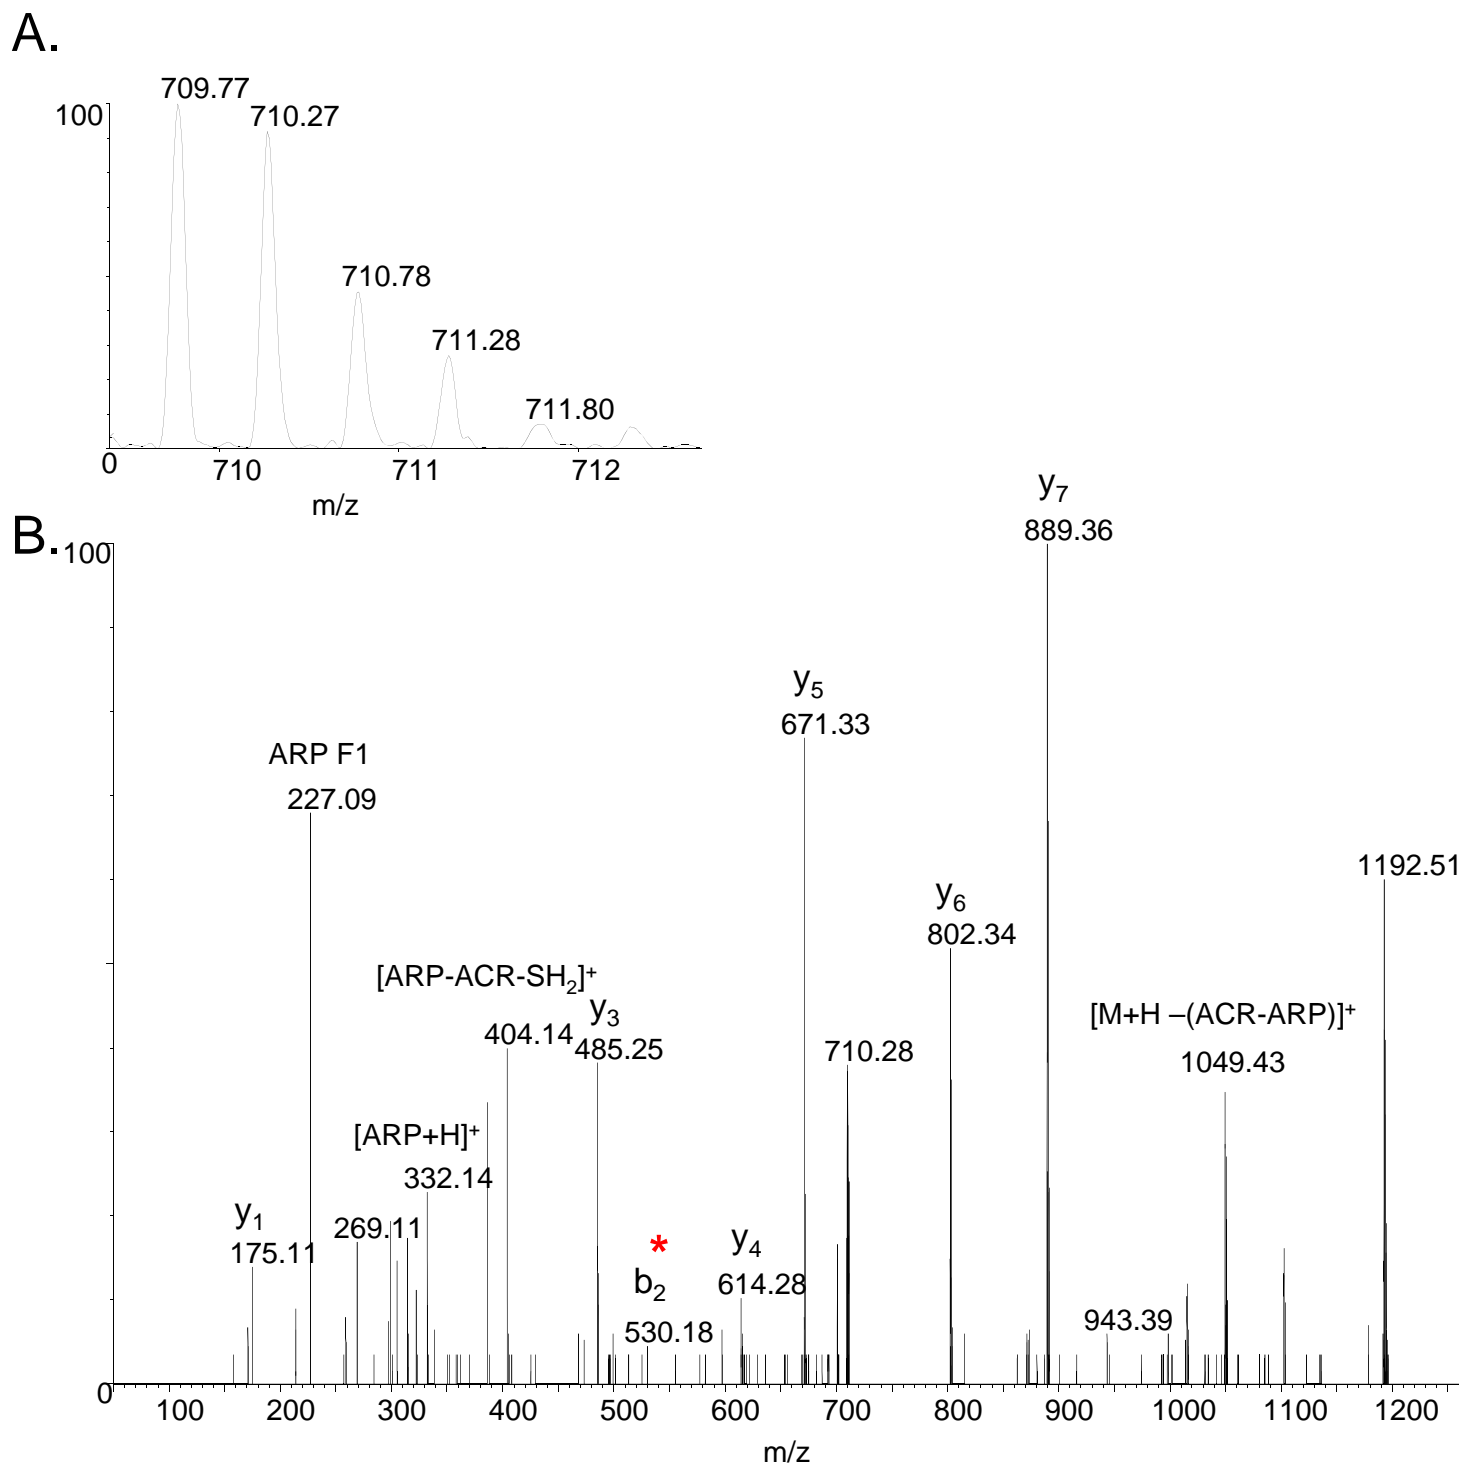

**Figure S5.** (A) Full mass spectrum and (B) MS/MS spectrum acquired by ESI-Q-TOF of the [M+2H]<sup>2+</sup> ion of the ARP labeled, acrolein modified peptide GC\*SMGEYFR; monoisotopic m/z<sub>calc</sub> 709.79; accuracy Δ(m/z) = -0.02 Da

# ATPA\_RAT ATP synthase subunit alpha

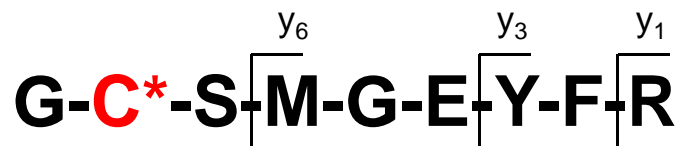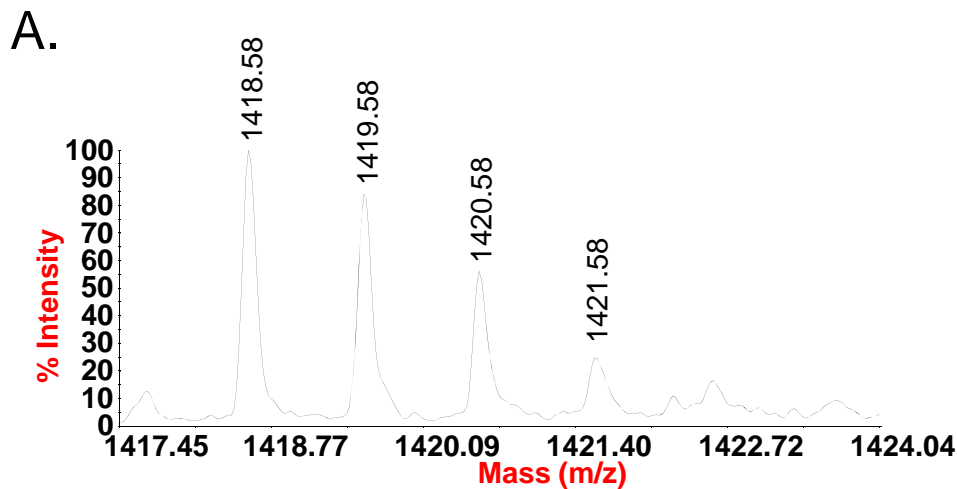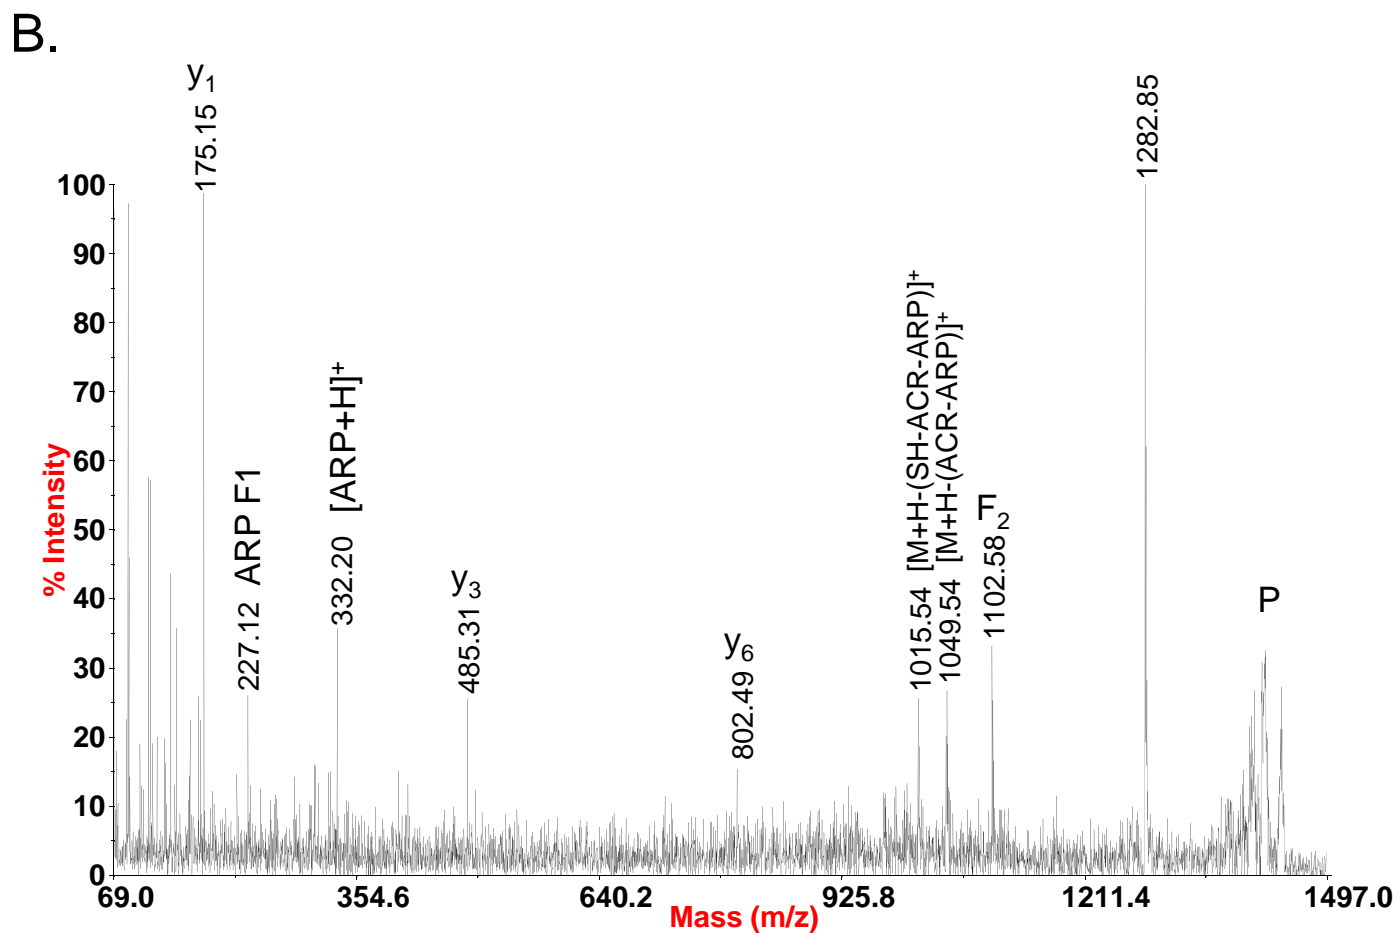

**Figure S6.** (A) Full mass spectrum and (B) MS/MS spectrum acquired by MALDI-TOF/TOF of the [M+H]<sup>+</sup> ion of the ARP labeled, acrolein modified peptide GC\*SMGEYFR; monoisotopic  $m/z_{calc}$  1418.57; accuracy  $\Delta(m/z) = 0.01$  Da

# ATPA\_RAT ATP synthase subunit alpha

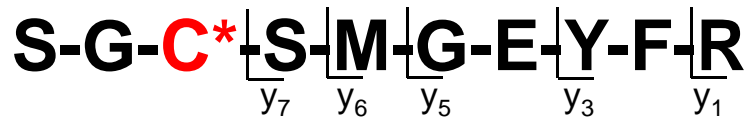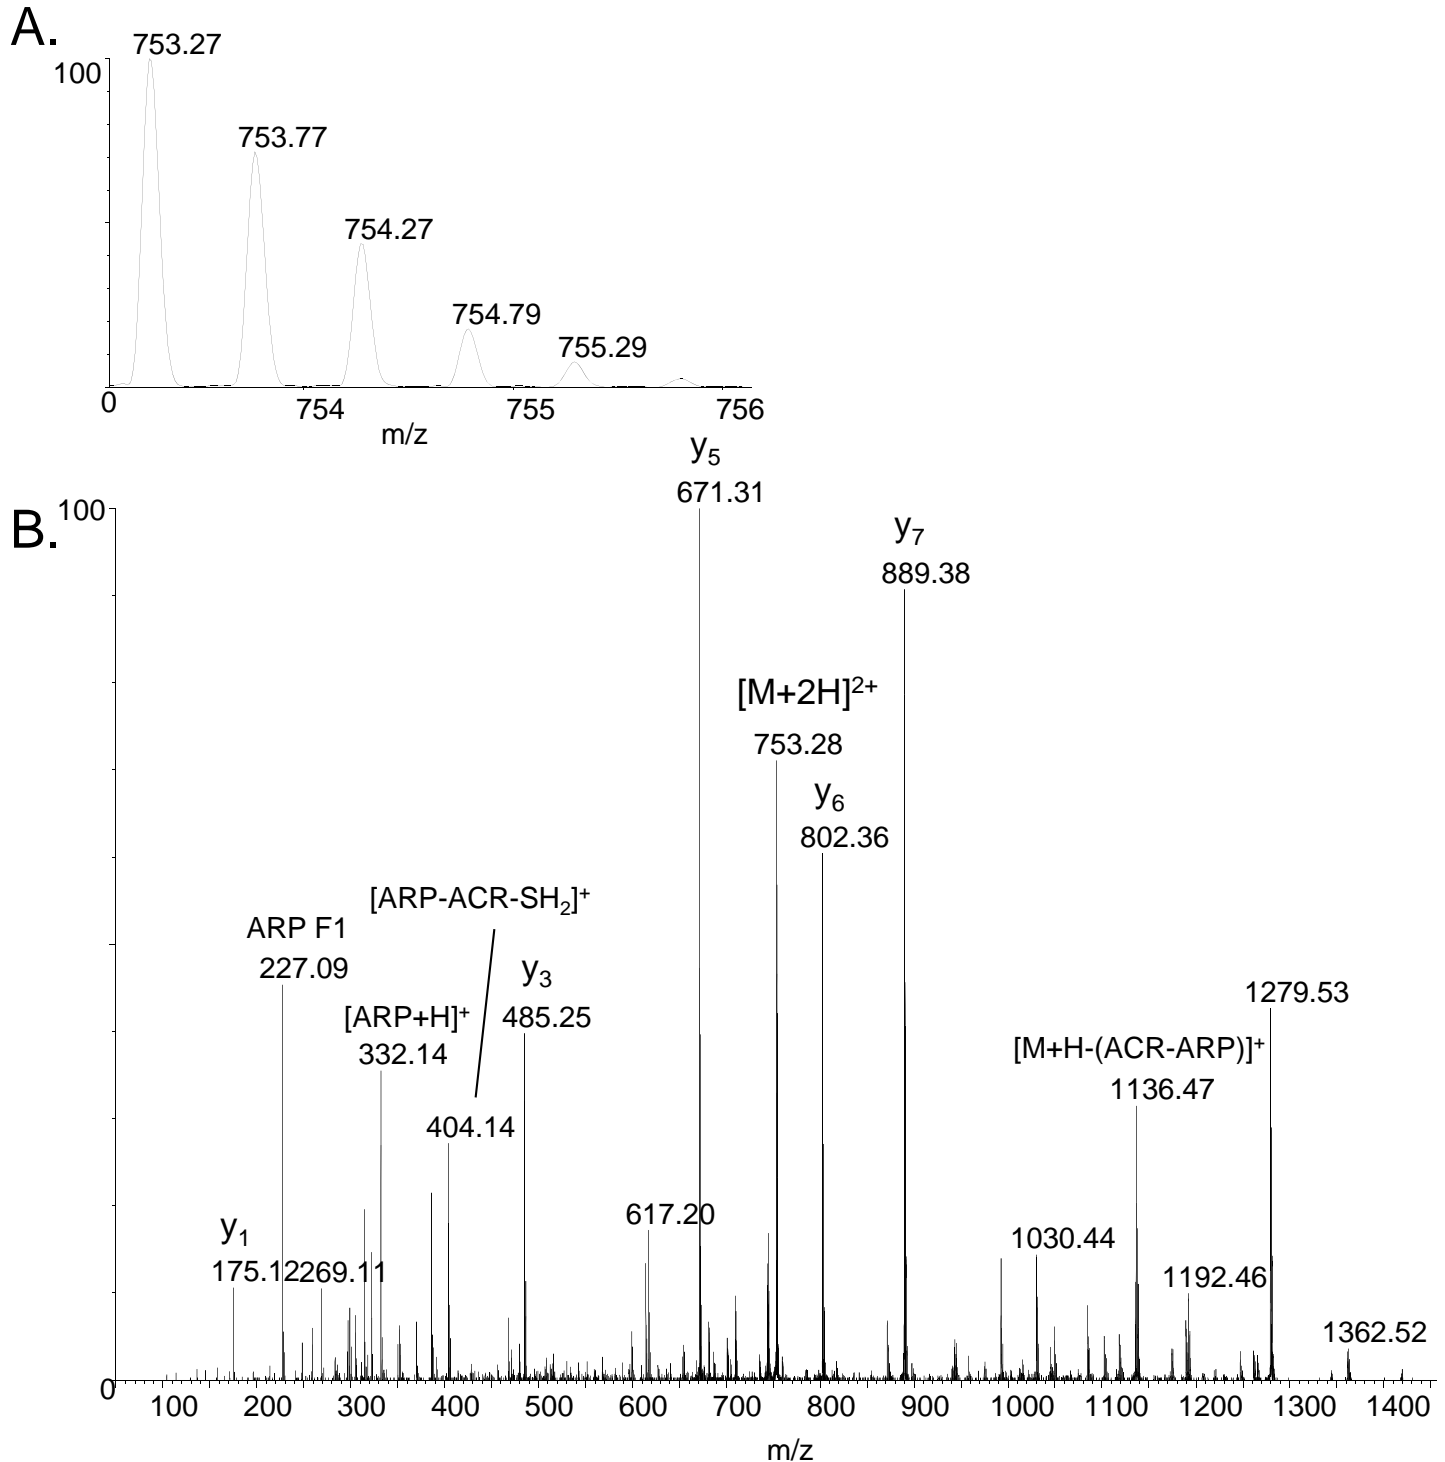

**Figure S7.** (A) Full mass spectrum and (B) MS/MS spectrum acquired by ESI-Q-TOF of the  $[M+2H]^{2+}$  ion of the ARP labeled, acrolein modified peptide SGC\*SMGEYFR; monoisotopic  $m/z_{\text{calc}}$  753.30; accuracy  $\Delta(m/z) = -0.03$  Da



# ATPA\_RAT ATP synthase subunit alpha

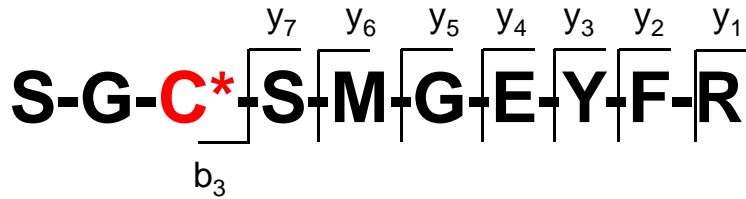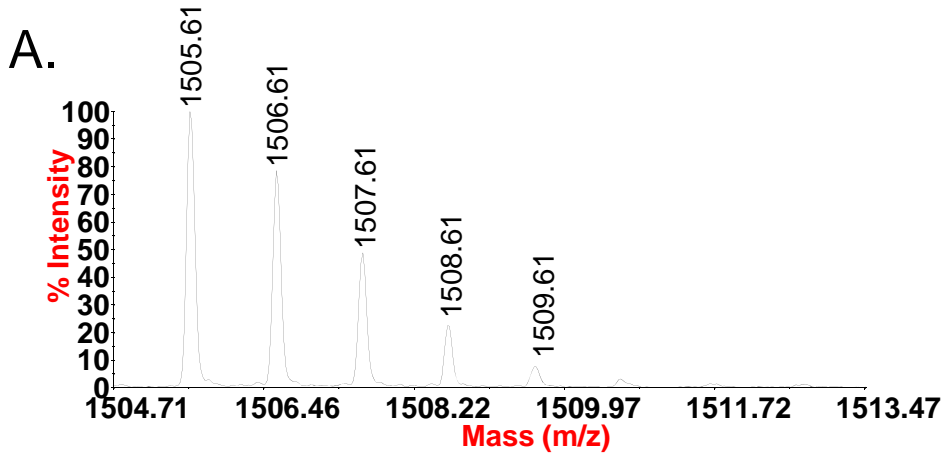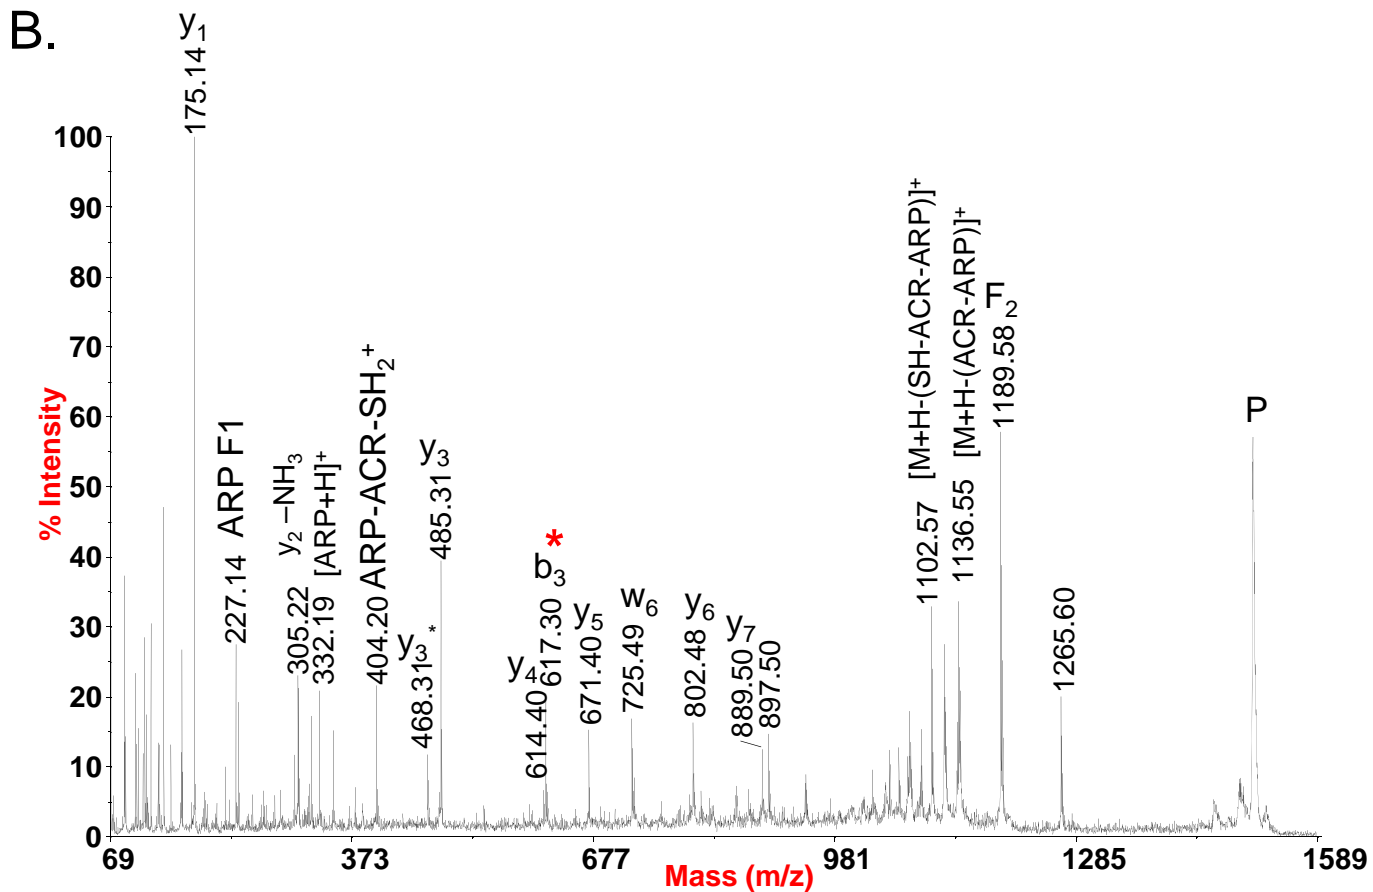

**Figure S8.** (A) Full mass spectrum and (B) MS/MS spectrum acquired by MALDI-TOF/TOF of the  $[M+H]^+$  ion of the ARP labeled, acrolein modified peptide SGC\*SMGEYFR; monoisotopic  $m/z_{\text{calc}}$  1505.60; accuracy  $\Delta(m/z) = 0.01$  Da

# ATPA\_RAT ATP synthase subunit alpha

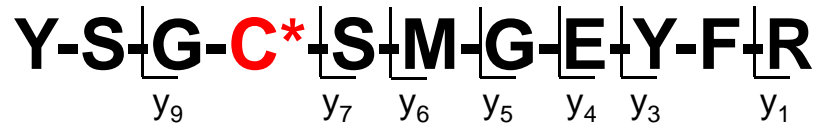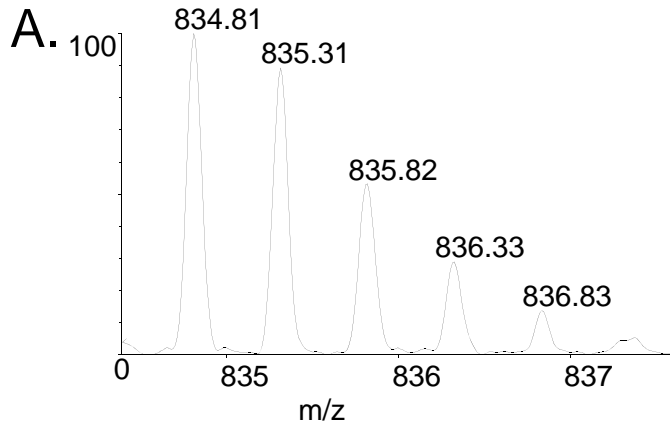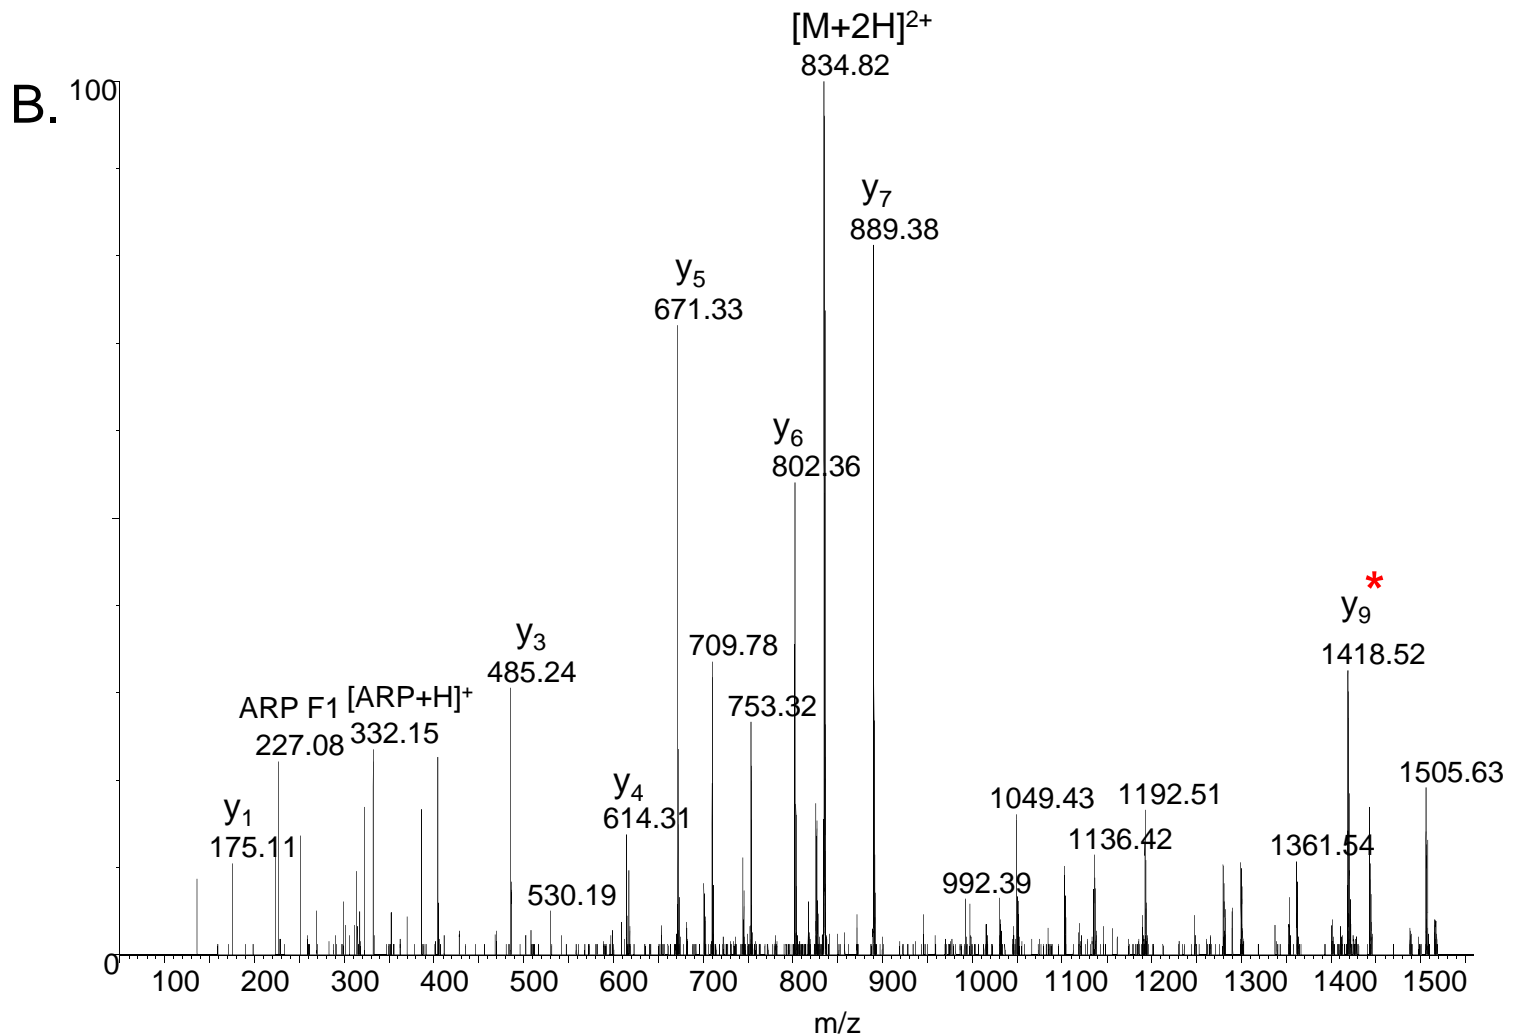

**Figure S9.** (A) Full mass spectrum and (B) MS/MS spectrum acquired by ESI-Q-TOF of the  $[M+2H]^{2+}$  ion of the ARP labeled, acrolein modified peptide YSGC\*SMGEYFR; monoisotopic  $m/z_{\text{calc}}$  834.83; accuracy  $\Delta(m/z) = -0.02$  Da

# ATPA\_RAT ATP synthase subunit alpha

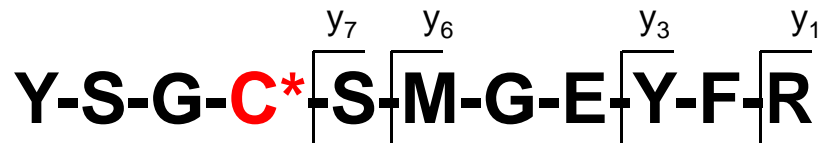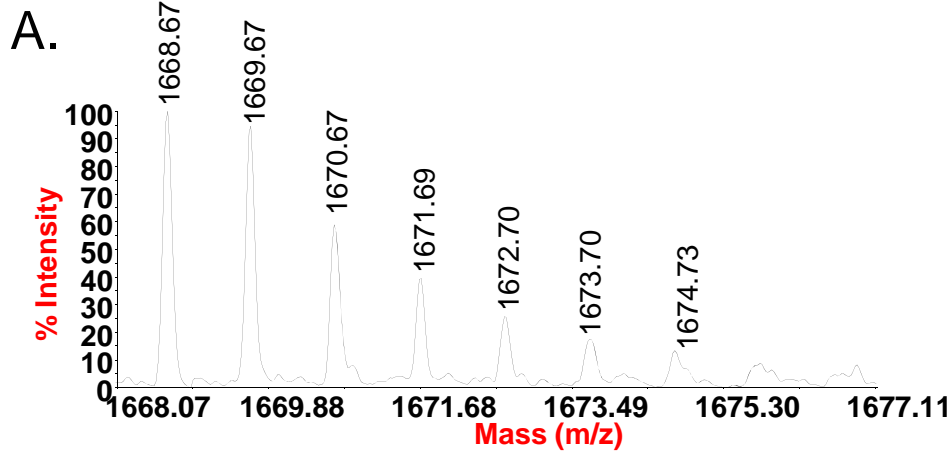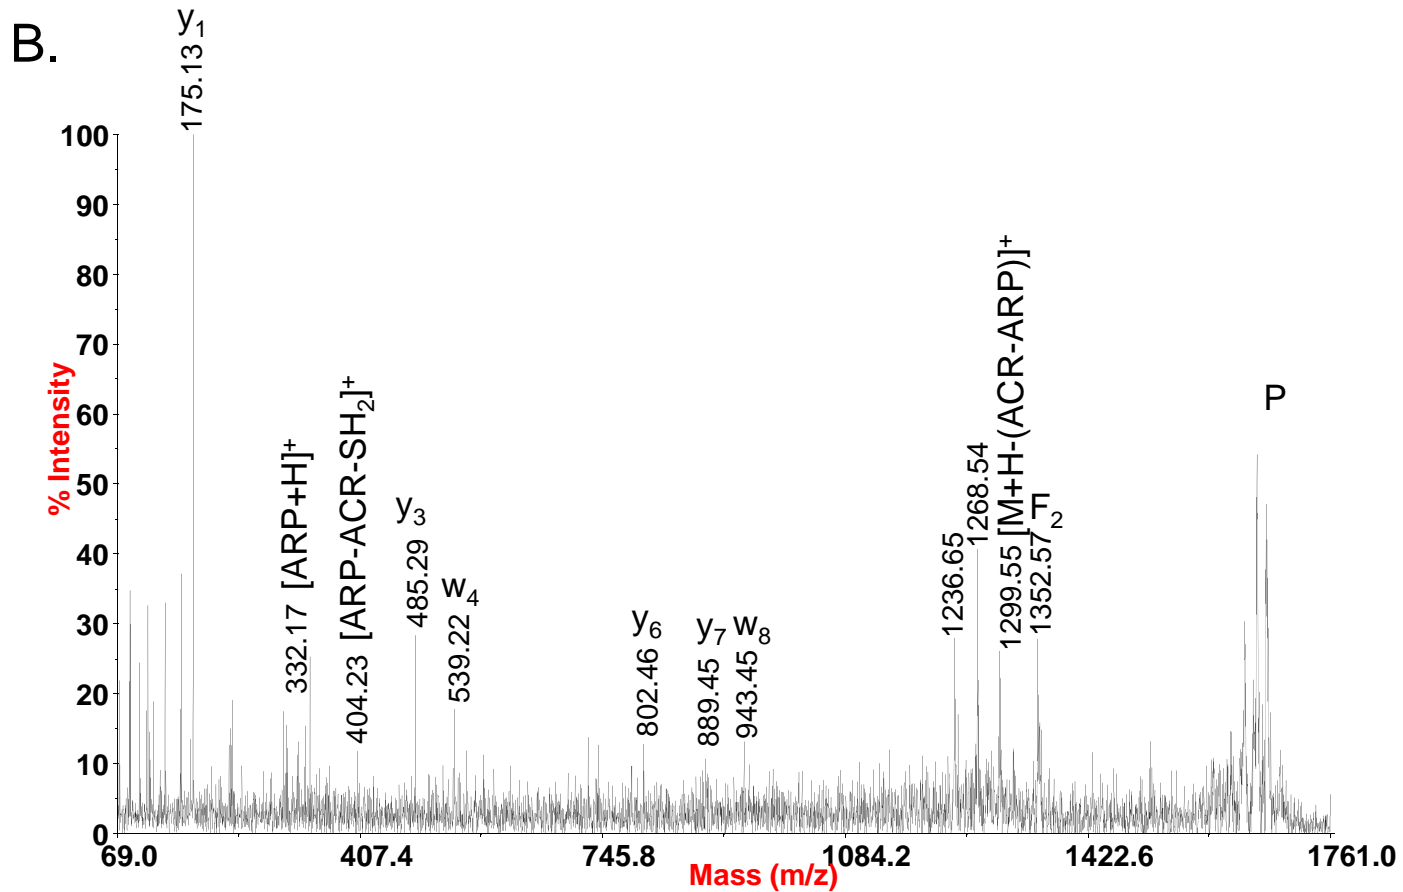

**Figure S10.** (A) Full mass spectrum and (B) MS/MS spectrum acquired by MALDI-TOF/TOF of the [M+H]<sup>+</sup> ion of the ARP labeled, acrolein modified peptide YSGC\*SMGEYFR; monoisotopic m/z<sub>calc</sub> 1668.66; accuracy Δ(m/z) = -0.01 Da

# ATPA\_RAT ATP synthase subunit alpha

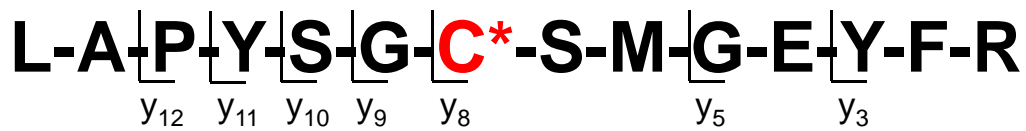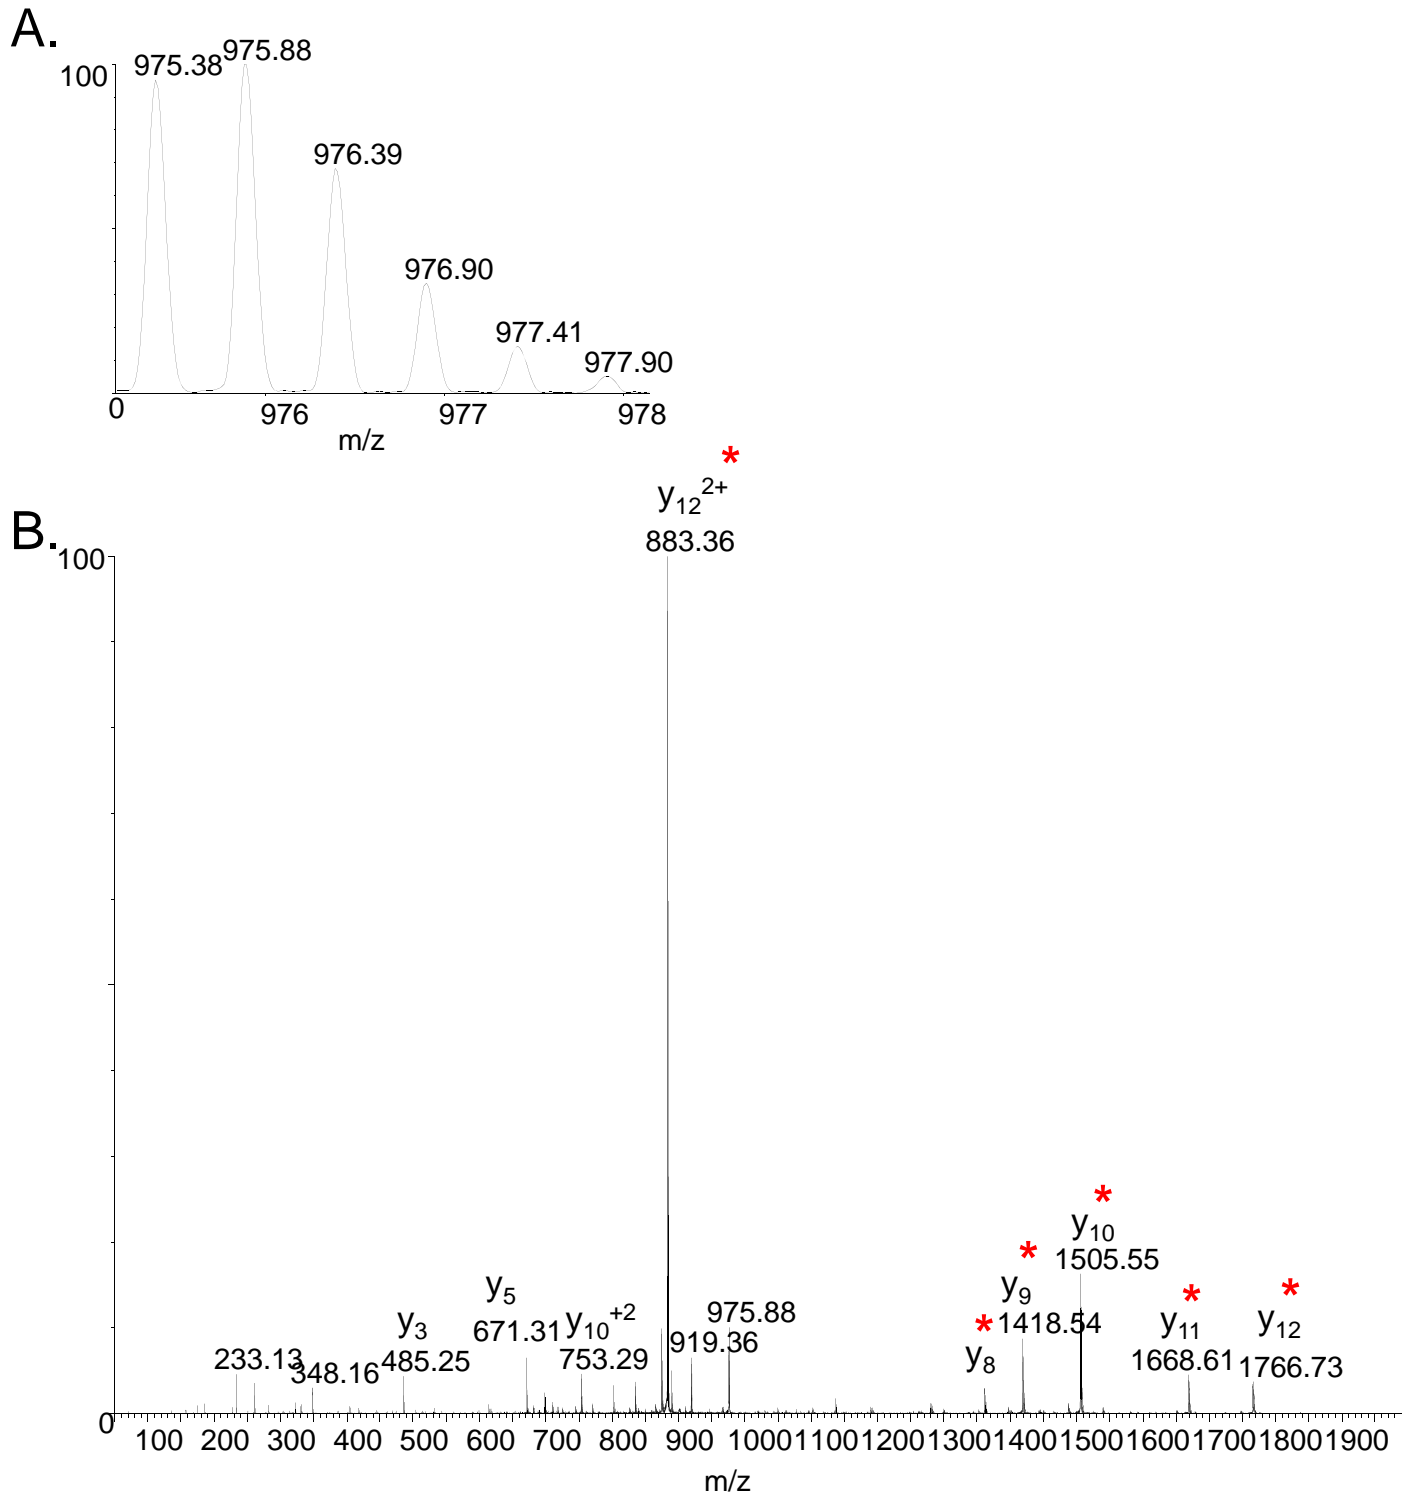

**Figure S11.** (A) Full mass spectrum and (B) MS/MS spectrum acquired by ESI-Q-TOF of the  $[M+2H]^{2+}$  ion of the ARP labeled, acrolein modified peptide LAPYSGC\*SMGEYFR; monoisotopic  $m/z_{\text{calc}}$  975.42; accuracy  $\Delta(m/z) = -0.04$  Da

# ATPB\_RAT: ATP synthase subunit beta

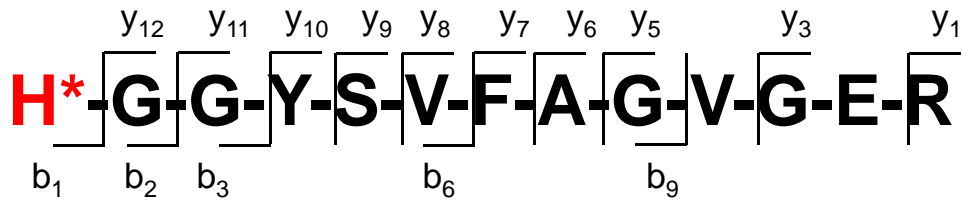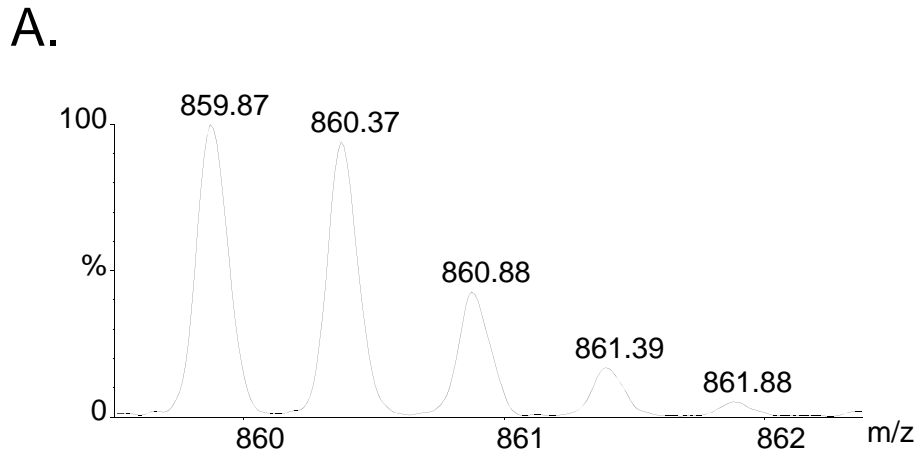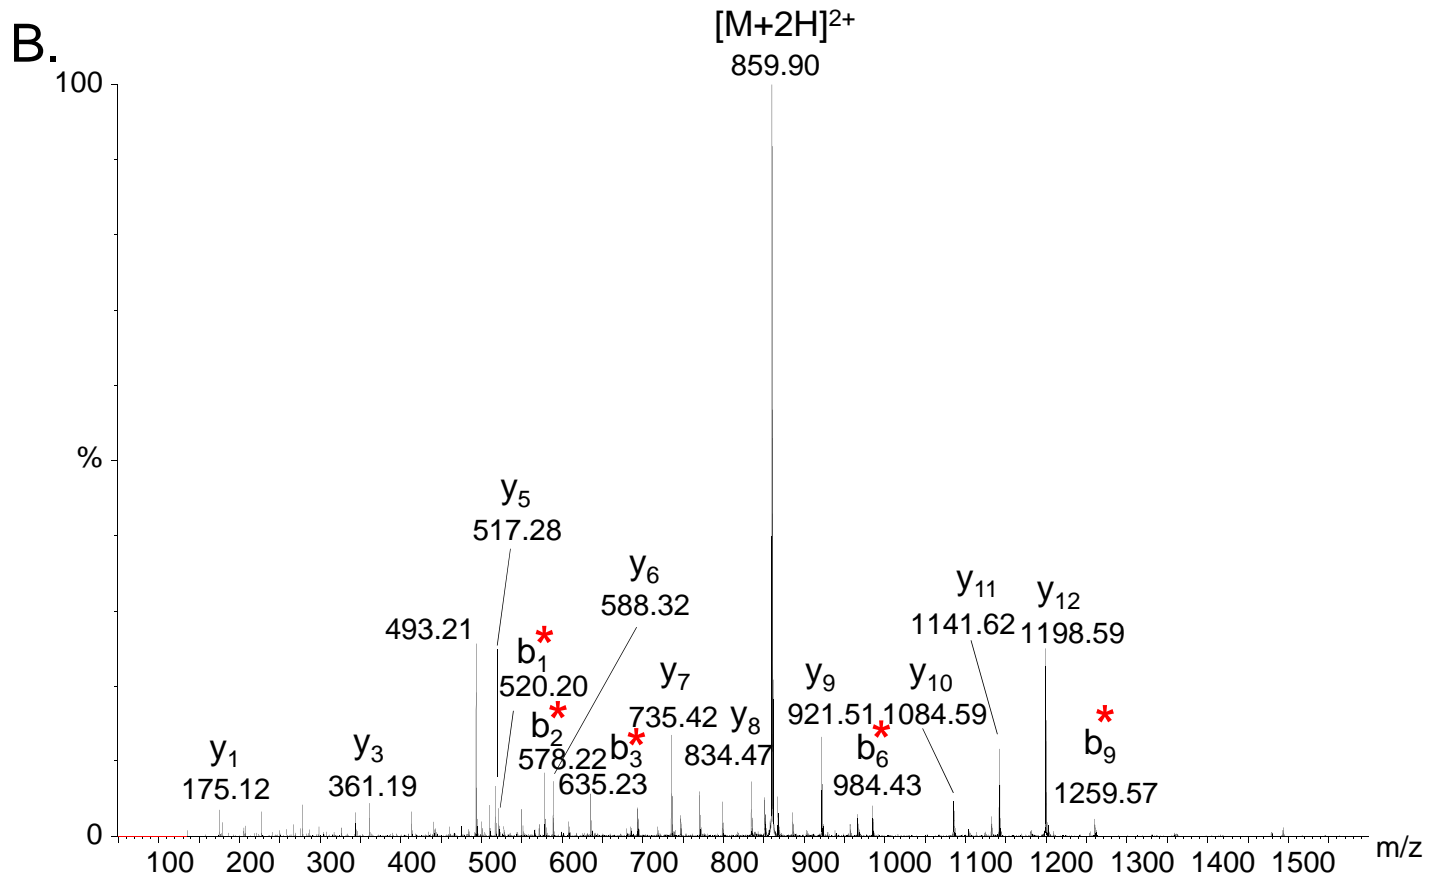

**Figure S12.** (A) Full mass spectrum and (B) MS/MS spectrum acquired by ESI-Q-TOF of the  $[M+2H]^{2+}$  ion of the ARP labeled, crotonaldehyde modified peptide H\*GGYSVFAGVGER; monoisotopic  $m/z_{\text{calc}}$  859.91; accuracy  $\Delta(m/z) = -0.04$  Da

# ATPB\_RAT: ATP synthase subunit beta

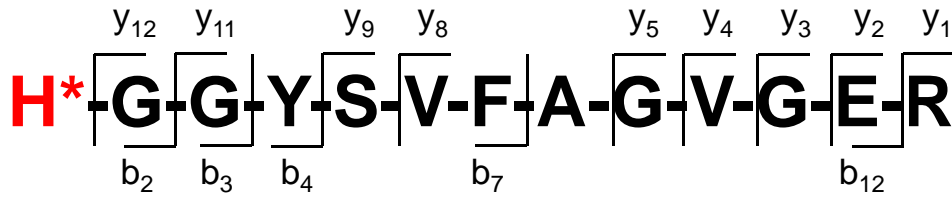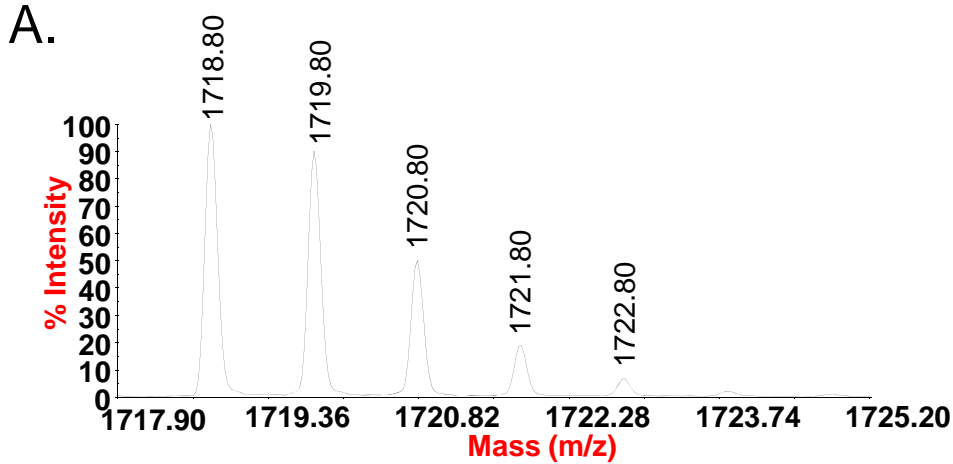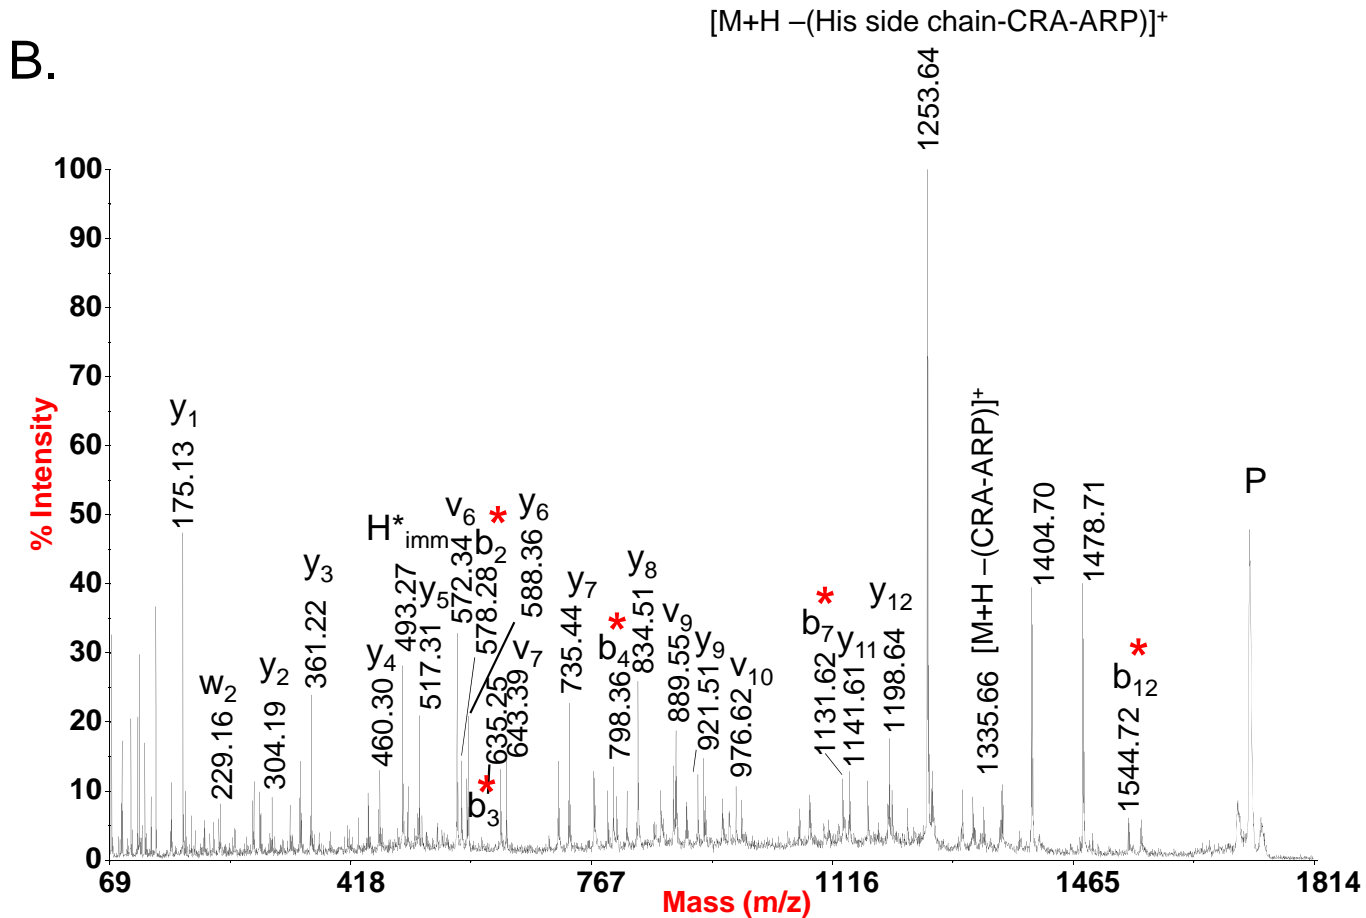

**Figure S13.** (A) Full mass spectrum and (B) MS/MS spectrum acquired by MALDI-TOF/TOF of the  $[M+H]^+$  ion of the ARP labeled, crotonaldehyde modified peptide H\*GGYSVFAAGVGER; monoisotopic  $m/z_{\text{calc}}$  1718.81; accuracy  $\Delta(m/z) = -0.01$  Da

# ATPG\_RAT: ATP synthase gamma chain

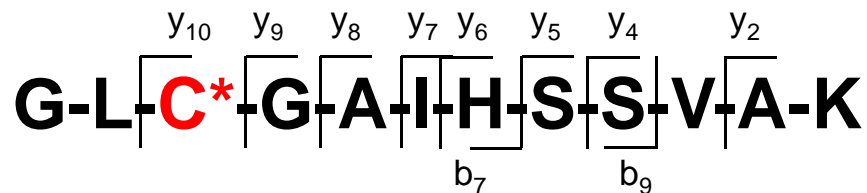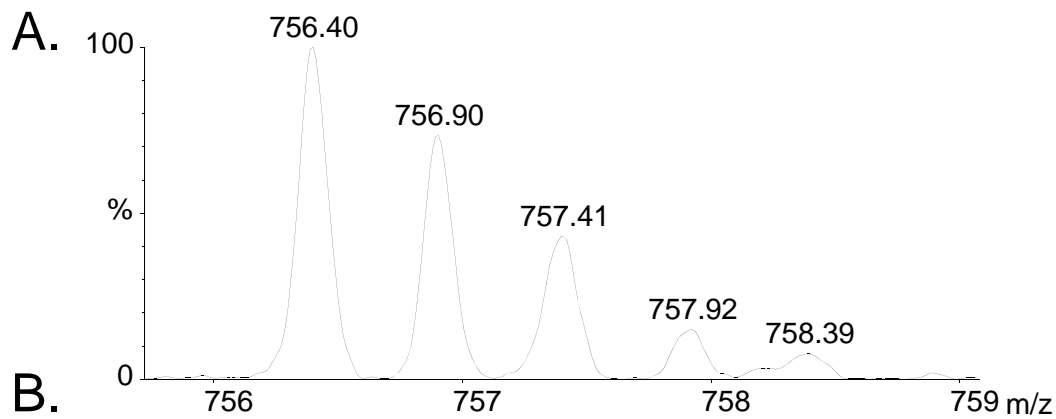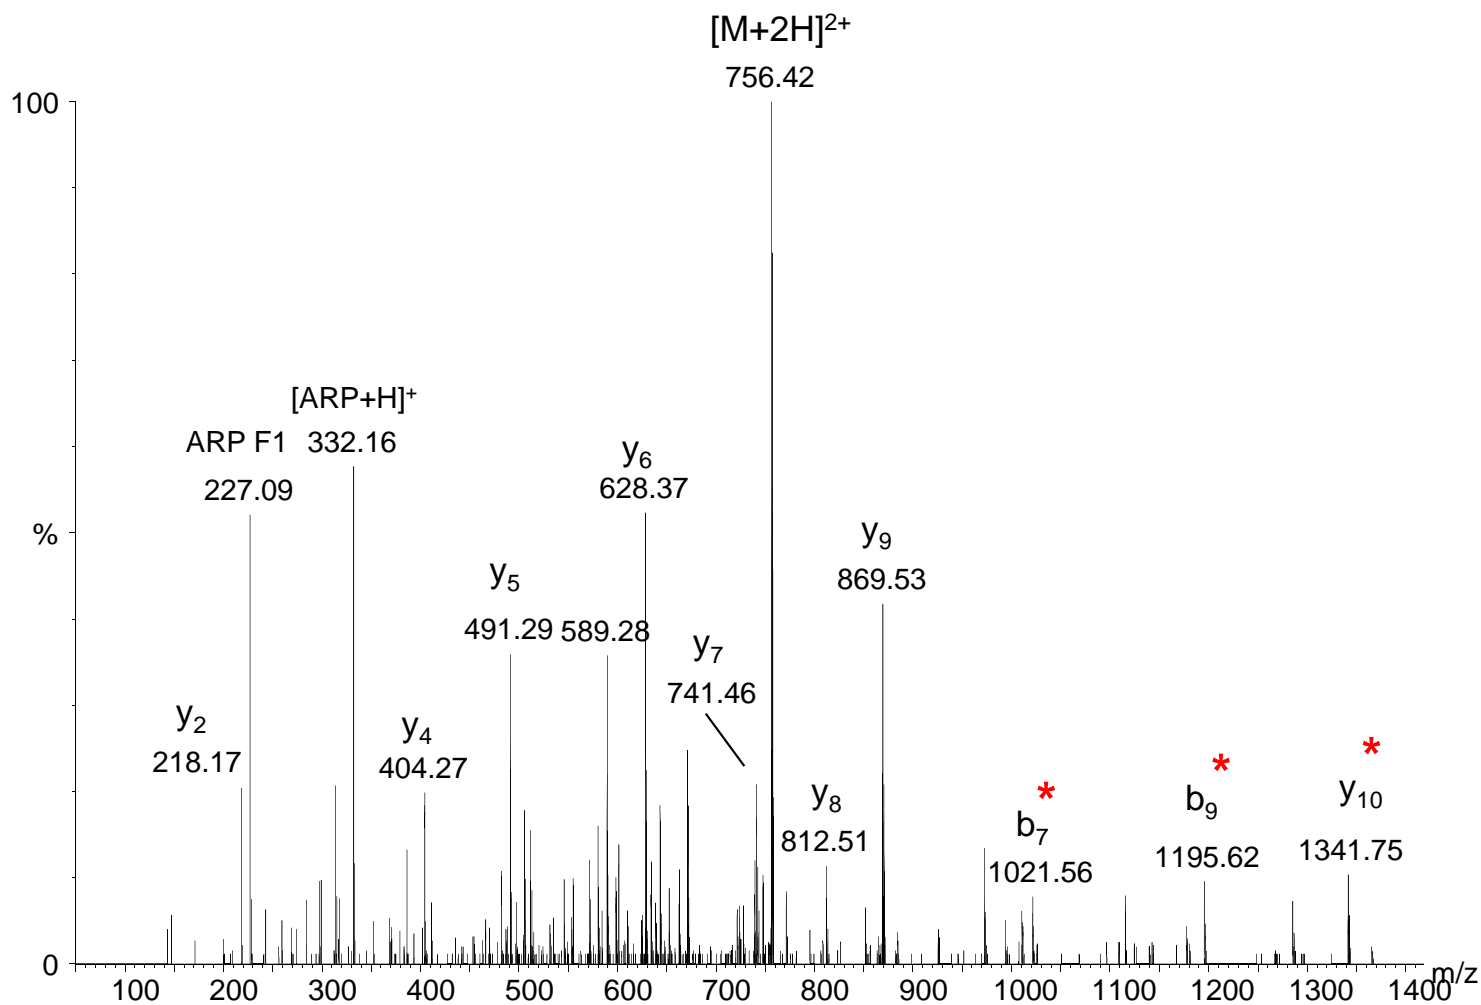

**Figure S14.** (A) Full mass spectrum and (B) MS/MS spectrum acquired by ESI-Q-TOF of the  $[M+2H]^{2+}$  ion of the ARP labeled, acrolein modified peptide GLC\*GAIHSSVAK; monoisotopic  $m/z_{\text{calc}}$  756.38; accuracy  $\Delta(m/z) = 0.02$  Da

# ATPG\_RAT: ATP synthase gamma chain

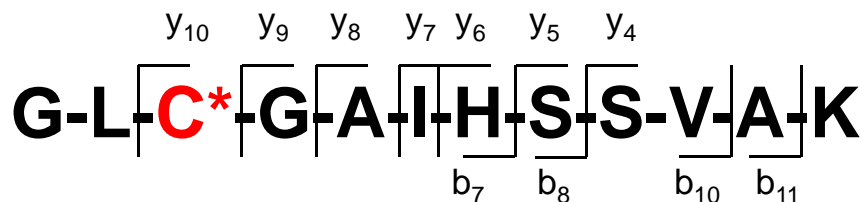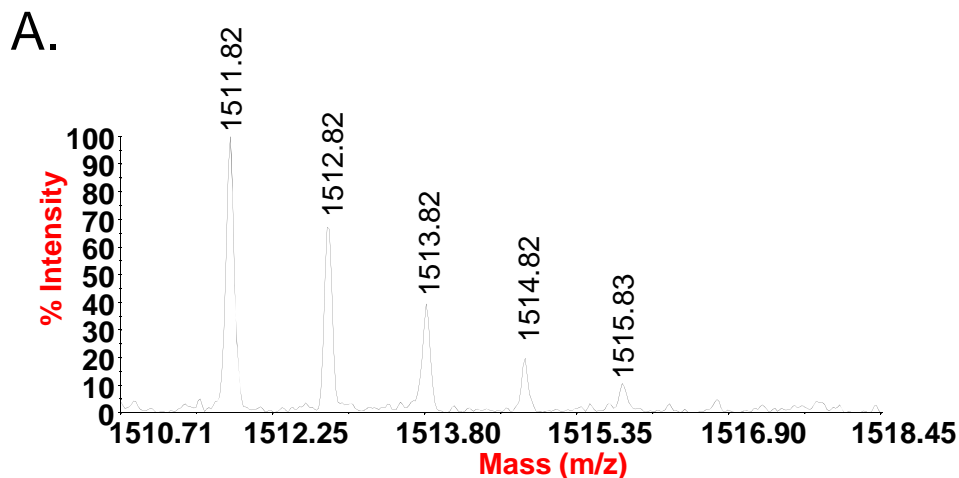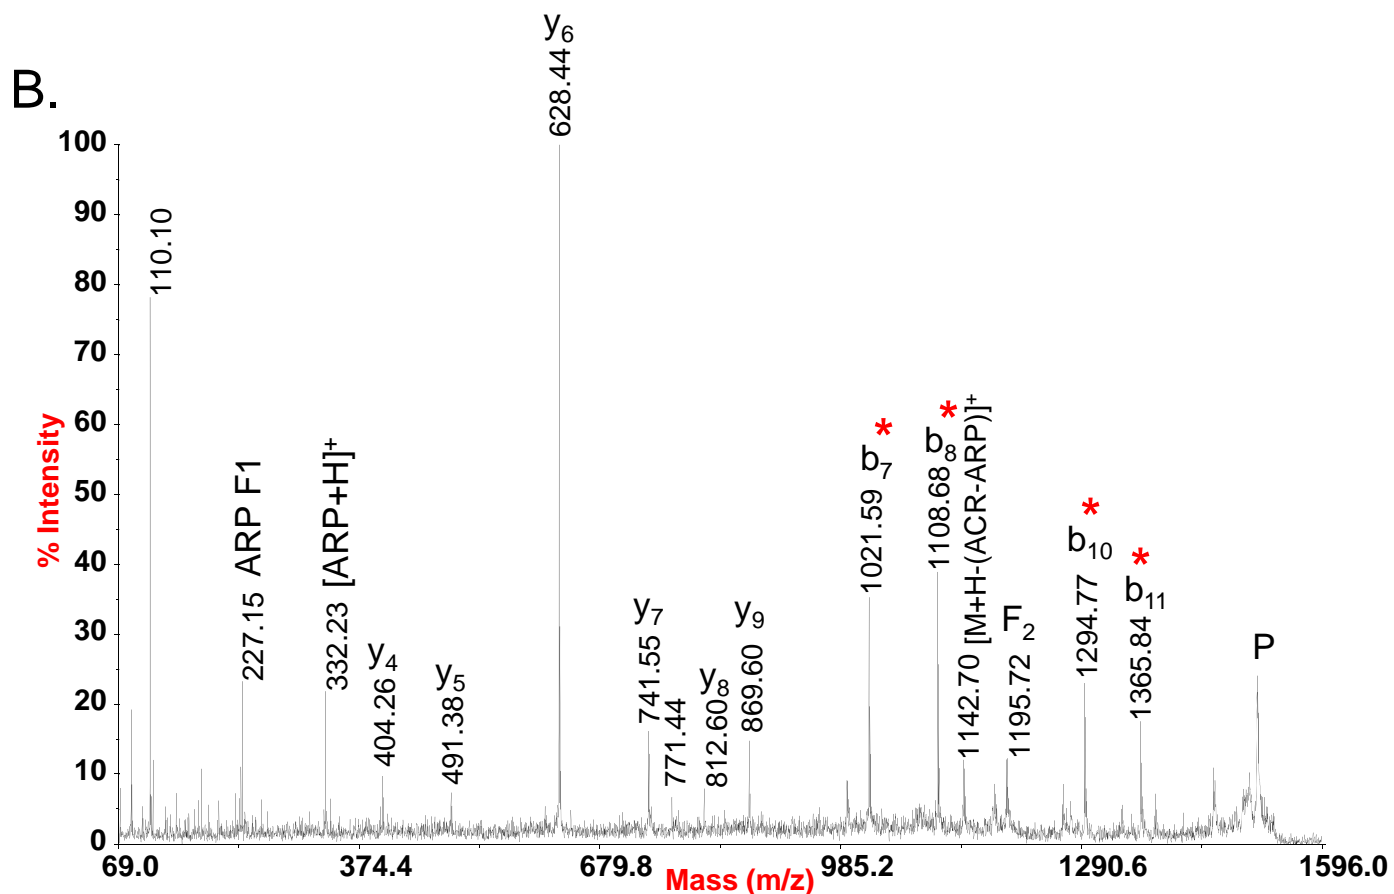

**Figure S15.** (A) Full mass spectrum and (B) MS/MS spectrum acquired by MALDI-TOF/TOF of the [M+H]<sup>+</sup> ion of the ARP labeled, acrolein modified peptide GLC\*GAIHSSVAK; monoisotopic  $m/z_{\text{calc}}$  1511.75; accuracy  $\Delta(m/z) = 0.07$  Da



# ATPG\_RAT: ATP synthase gamma chain

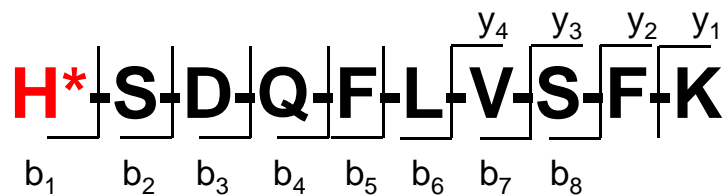

A.

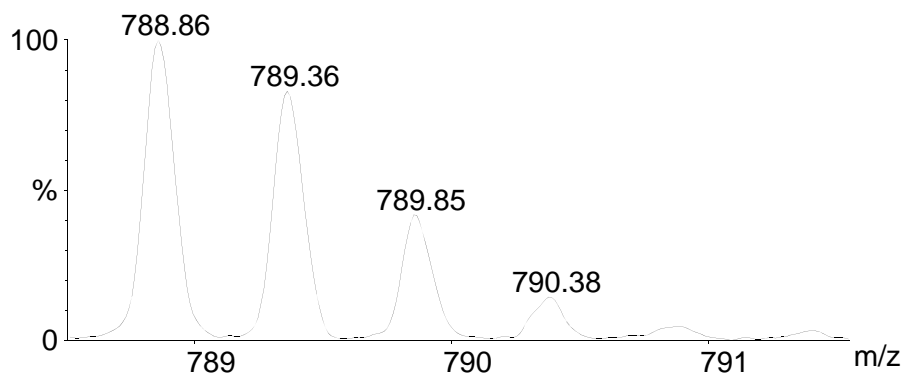

B.

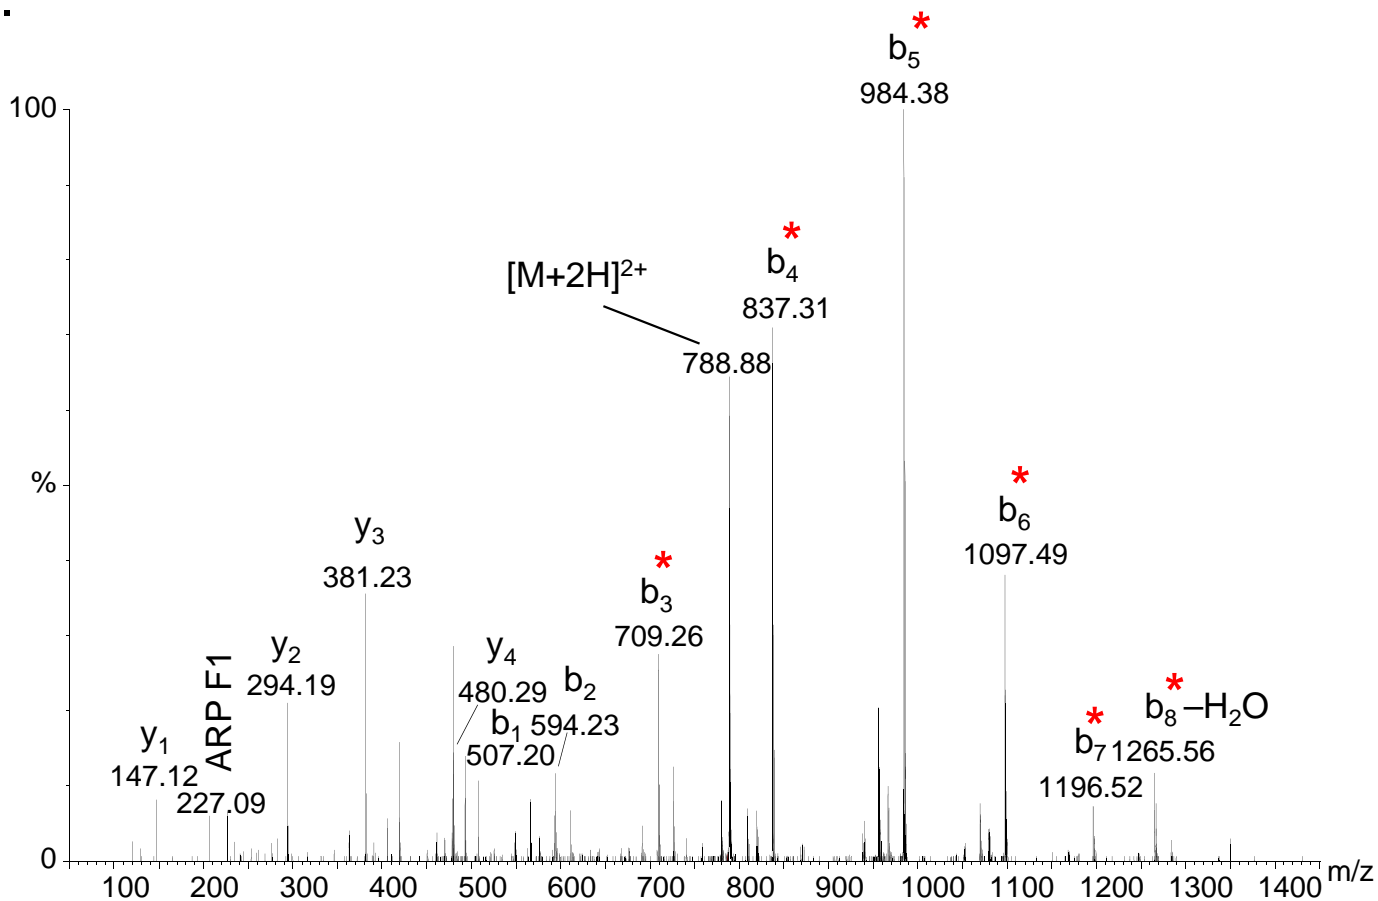

**Figure S16.** (A) Full mass spectrum and (B) MS/MS spectrum acquired by ESI-Q-TOF of the  $[M+2H]^{2+}$  ion of the ARP labeled, acrolein modified peptide H\*SDQFLVSFK; monoisotopic  $m/z_{\text{calc}}$  788.88; accuracy  $\Delta(m/z) = -0.02$  Da



# ATPO\_RAT: ATP synthase O subunit

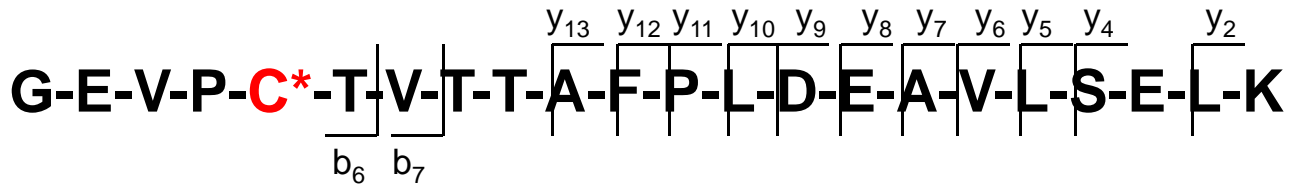

A.

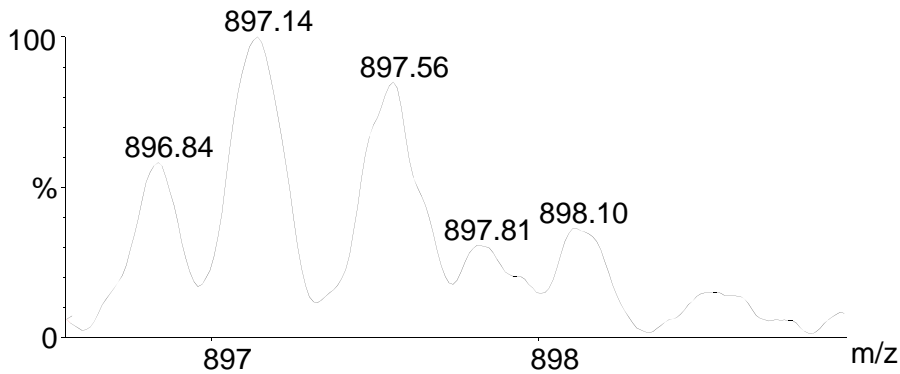

B.

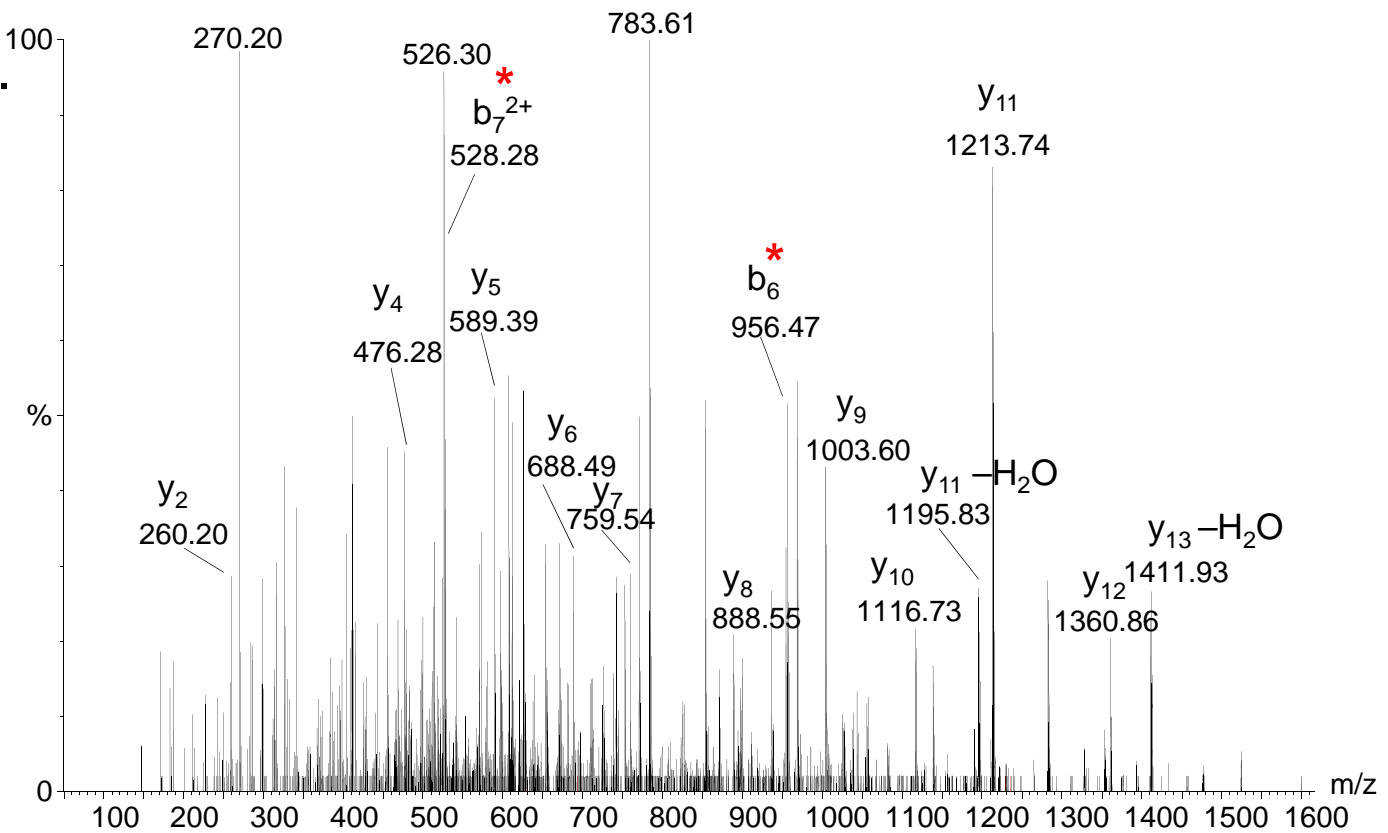

**Figure S18.** (A) Full mass spectrum and (B) MS/MS spectrum acquired by ESI-Q-TOF of the  $[M+3H]^{3+}$  ion of the ARP labeled, acrolein modified peptide GEVPC\*TVTTAFPLDEAVLSELK; monoisotopic  $m/z_{calc}$  896.78; accuracy  $\Delta(m/z) = 0.06$  Da

# ATPO\_RAT: ATP synthase O subunit

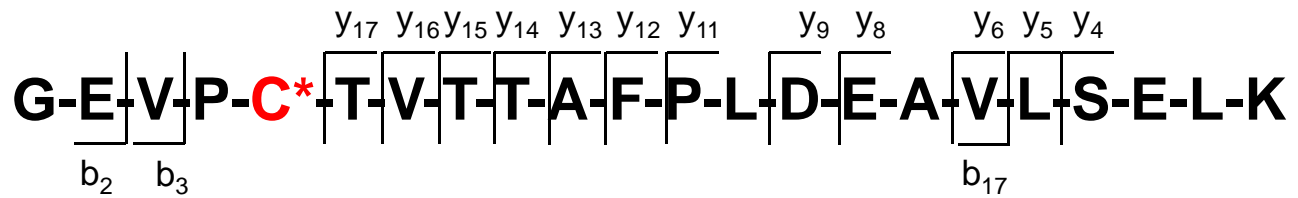

A.

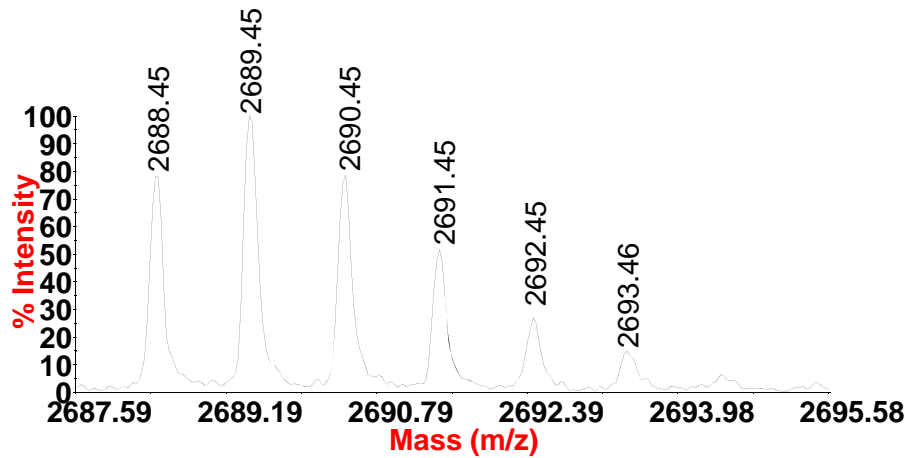

B.

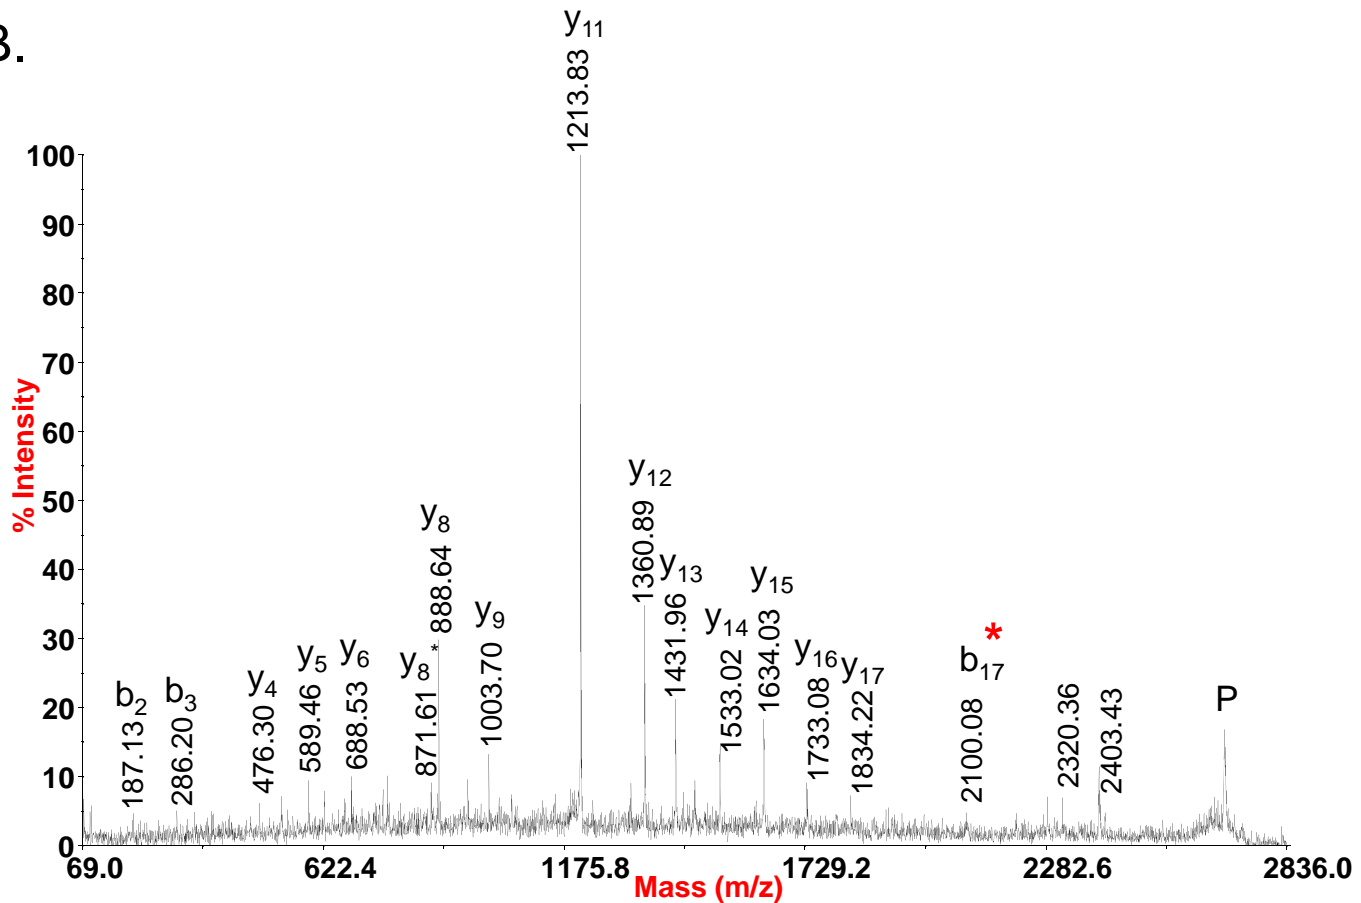

**Figure S19.** (A) Full mass spectrum and (B) MS/MS spectrum acquired by MALDI-TOF/TOF of the  $[M+H]^+$  ion of the ARP labeled, acrolein modified peptide GEVPC\*TVTTAFPLDEAVLSELK; monoisotopic  $m/z_{\text{calc}}$  2688.33; accuracy  $\Delta(m/z) = 0.12$  Da

CX6B1\_MOUSE, Cytochrome c oxidase subunit VIb isoform

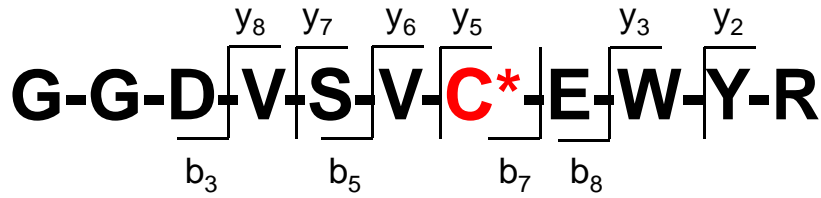

A.

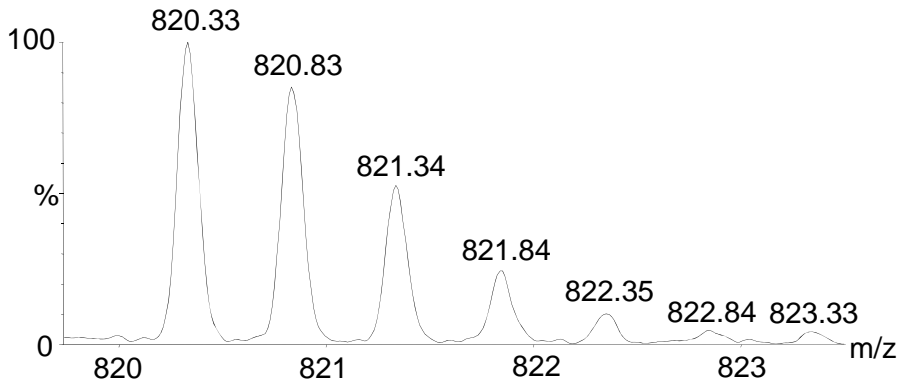

B.

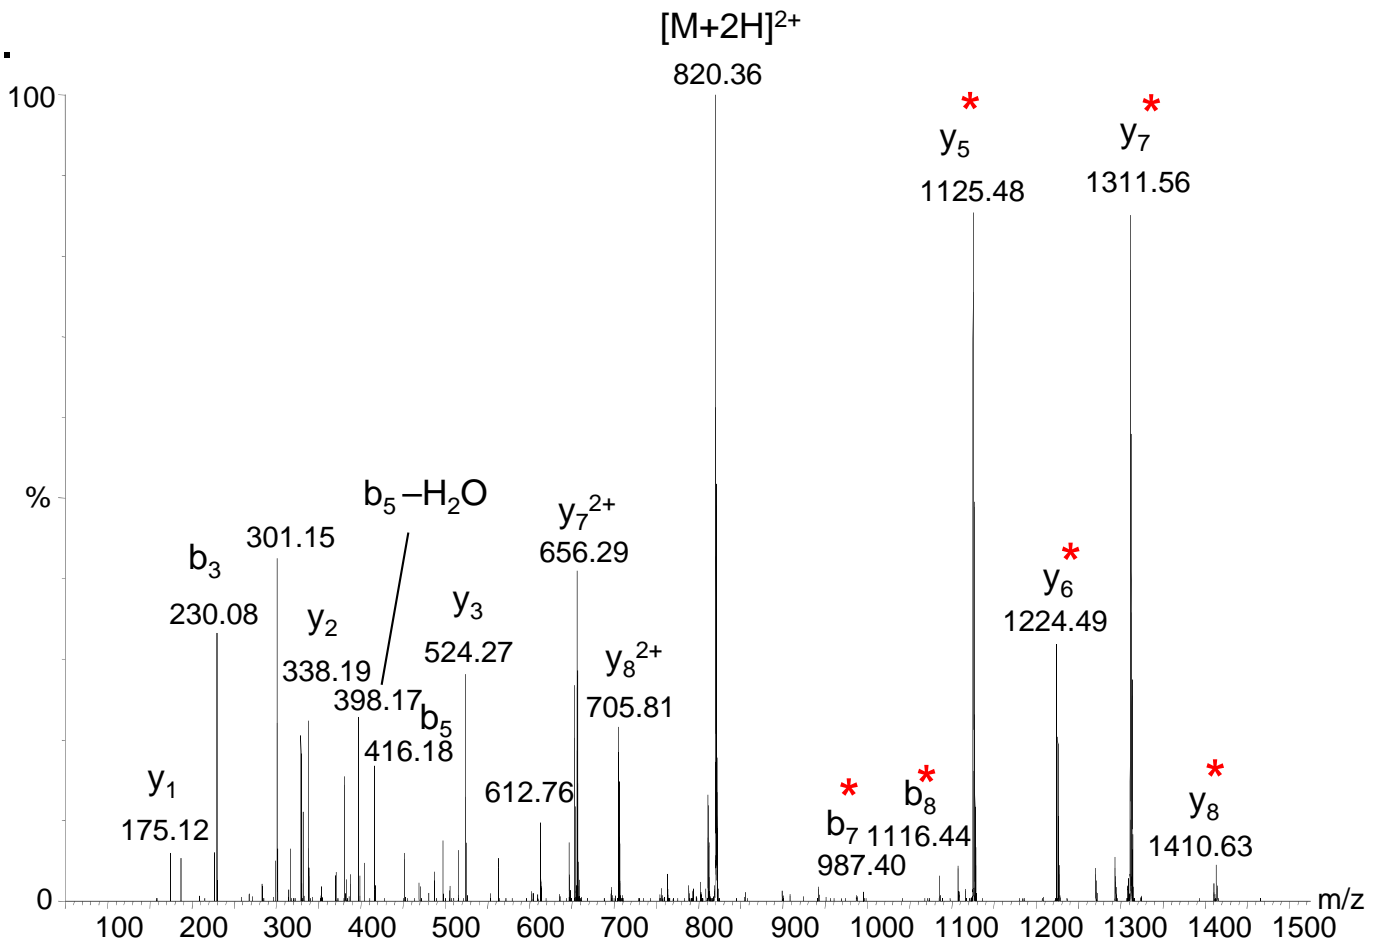

**Figure S20.** (A) Full mass spectrum and (B) MS/MS spectrum acquired by ESI-Q-TOF of the  $[M+2H]^{2+}$  ion of the ARP labeled, acrolein modified peptide GGDVSV-C\*EWYR; monoisotopic  $m/z_{calc}$  820.35; accuracy  $\Delta(m/z) = -0.02$  Da

# NDUV1\_MOUSE: NADH dehydrogenase [ubiquinone] flavoprotein 1

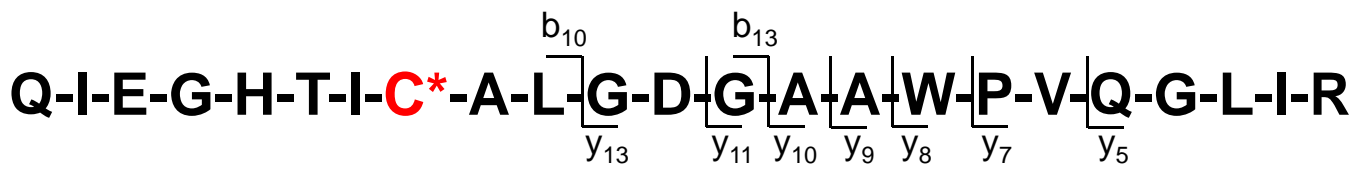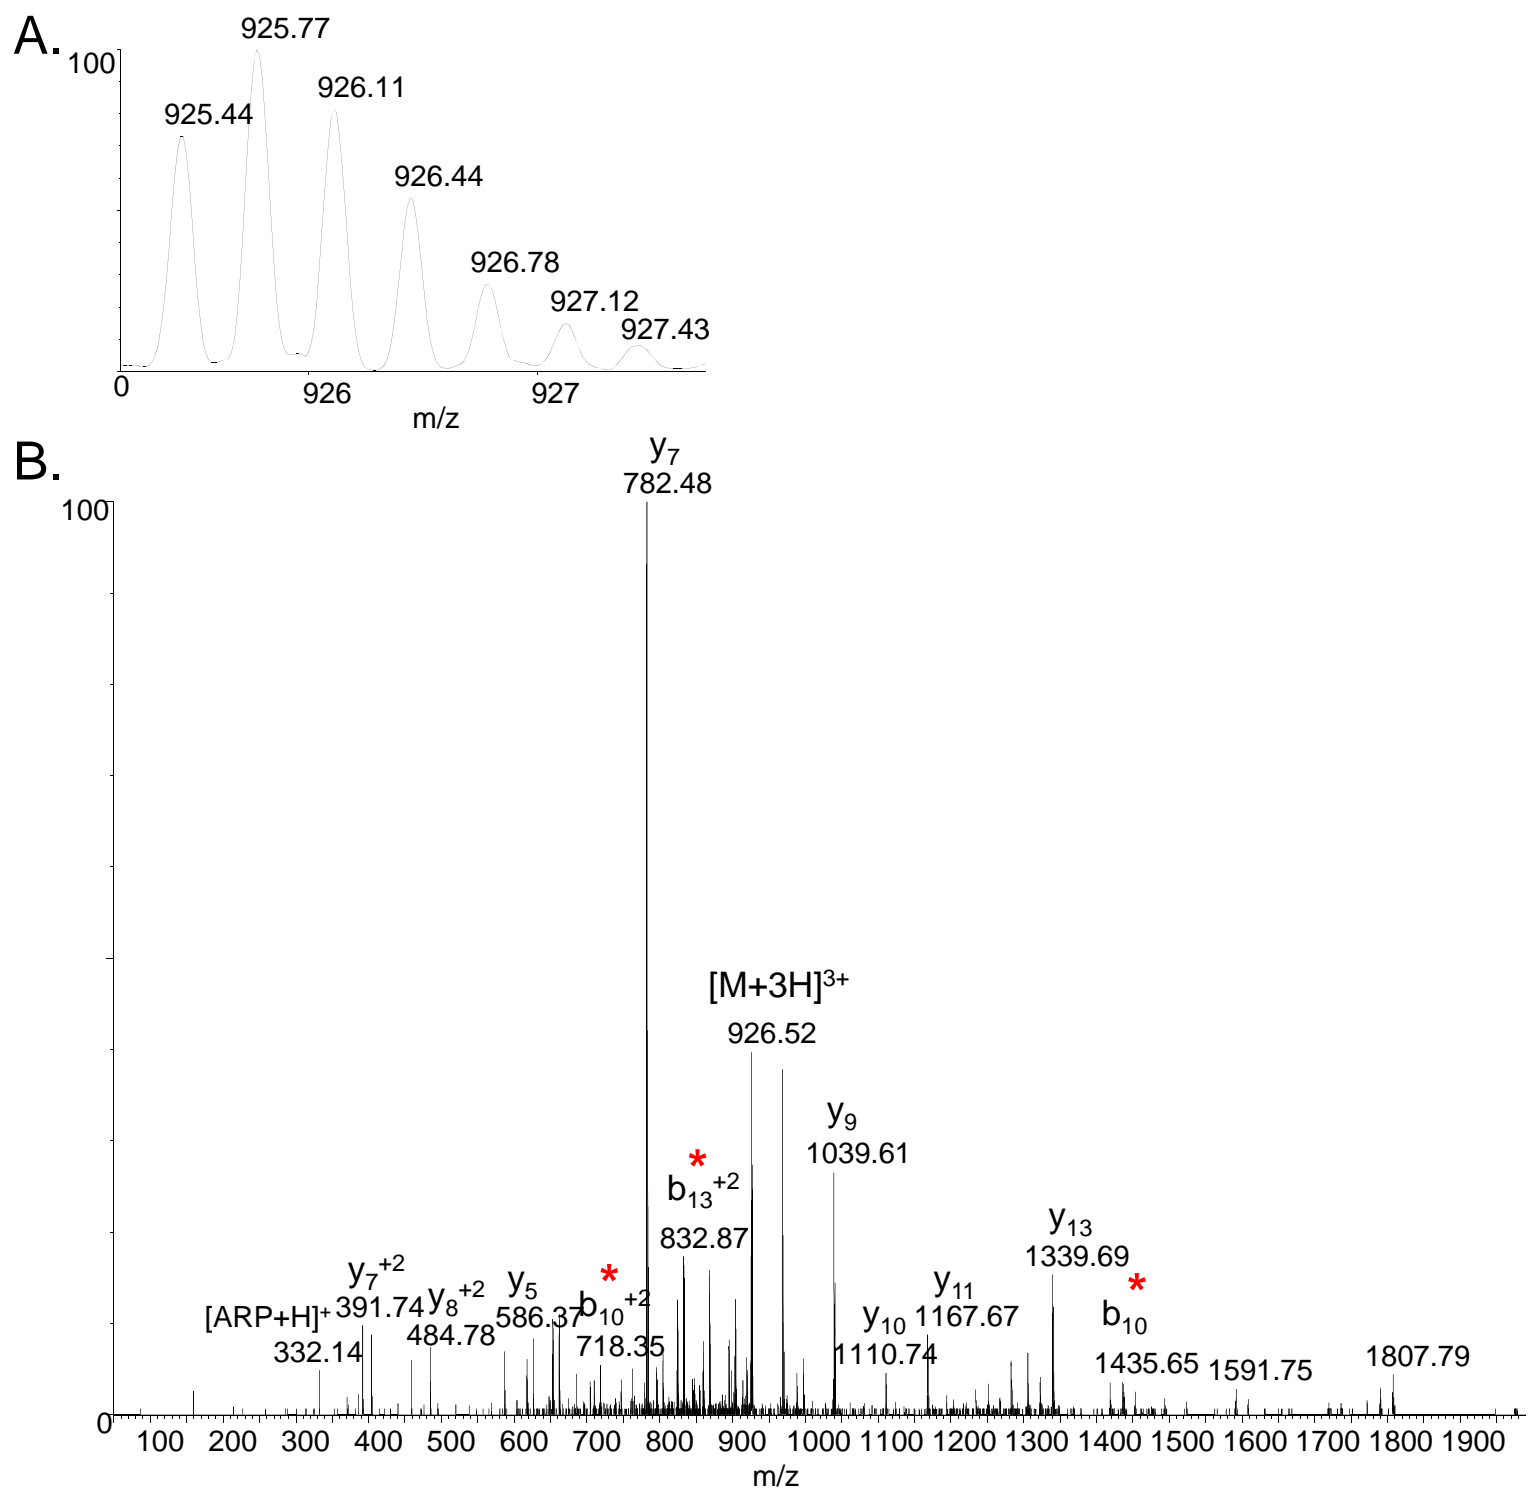

**Figure S21.** (A) Full mass spectrum and (B) MS/MS spectrum acquired by ESI-Q-TOF of the [M+3H]<sup>3+</sup> ion of the ARP labeled, acrolein modified peptide QIEGHTIC\*ALGDGAAWVPVQGLIR; monoisotopic m/z<sub>calc</sub> 925.47; accuracy Δ(m/z) = -0.03 Da

# QCR1\_RAT: Ubiquinol-cytochrome-c reductase complex core protein 1

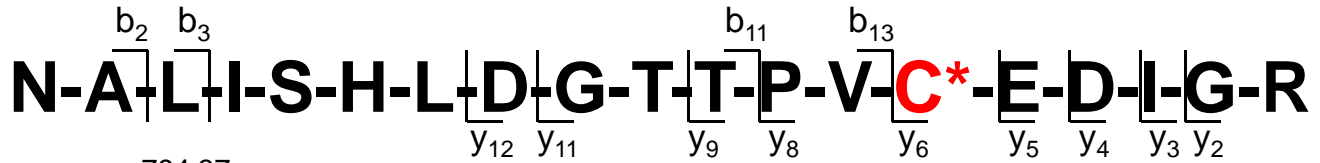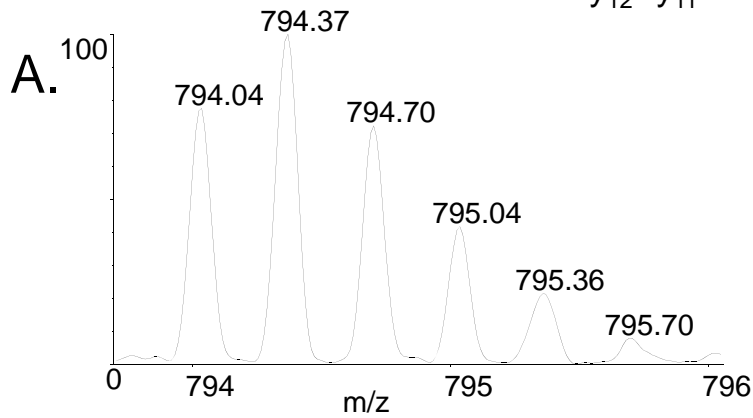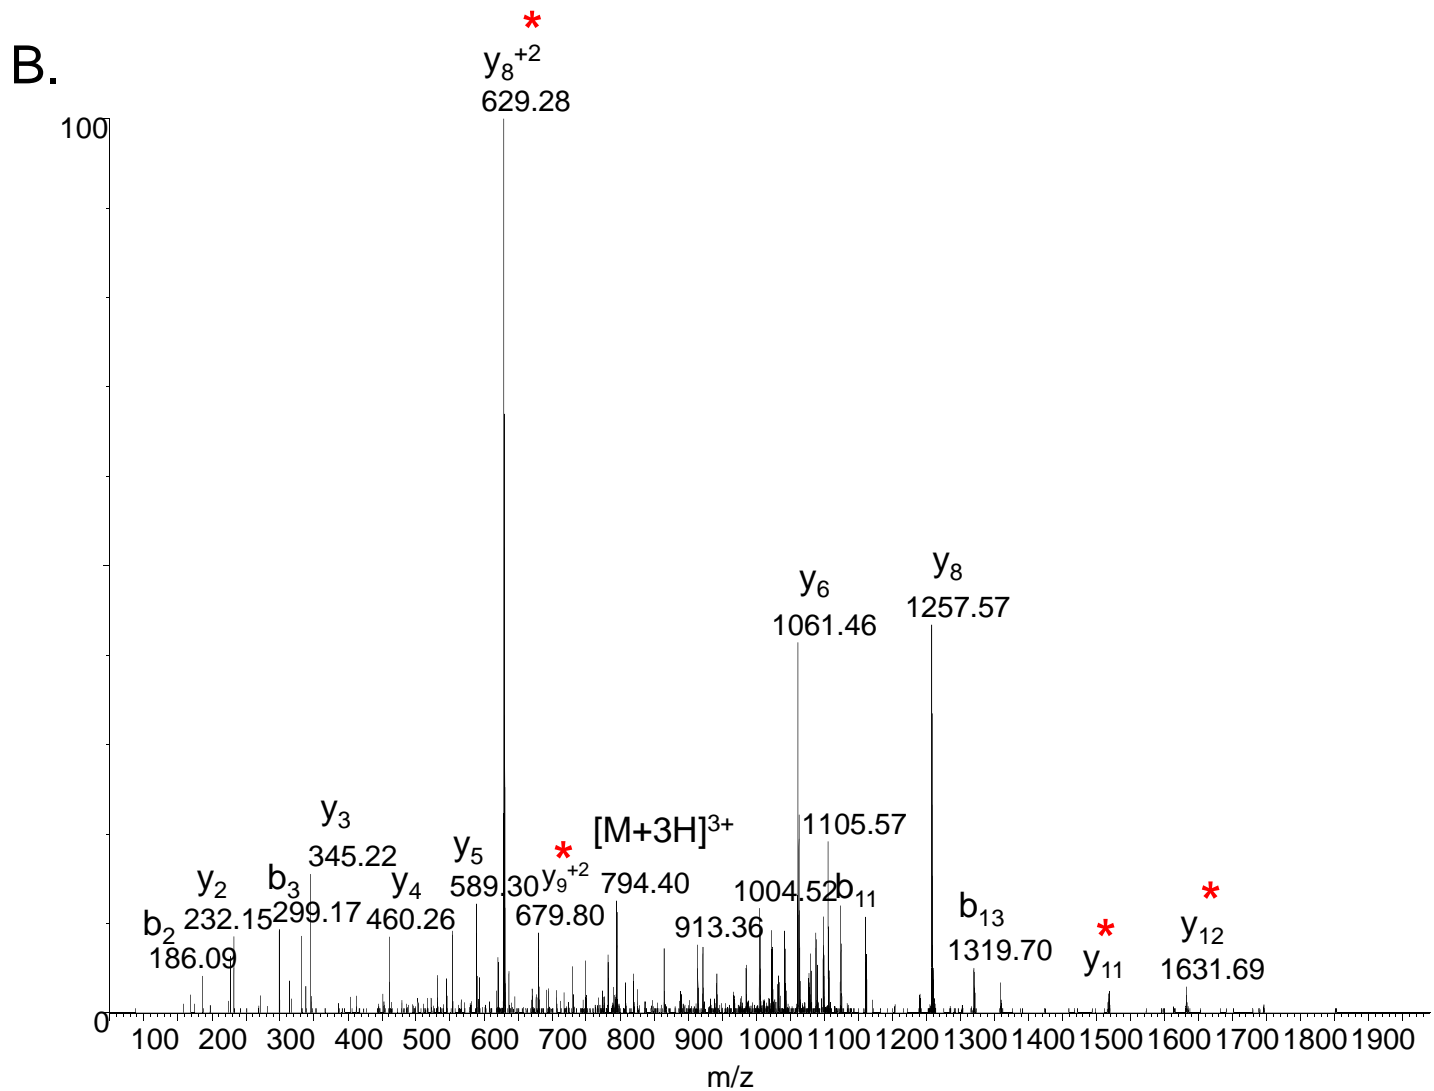

**Figure S22.** (A) Full mass spectrum and (B) MS/MS spectrum acquired by ESI-Q-TOF of the  $[M+3H]^{3+}$  ion of the ARP labeled, acrolein modified peptide NALISHLDGTT $\overline{PVC^*}$ EDIGR; monoisotopic  $m/z_{\text{calc}}$  794.05; accuracy  $\Delta(m/z) = -0.01$  Da

# QCR1\_RAT: Ubiquinol-cytochrome-c reductase complex core protein 1

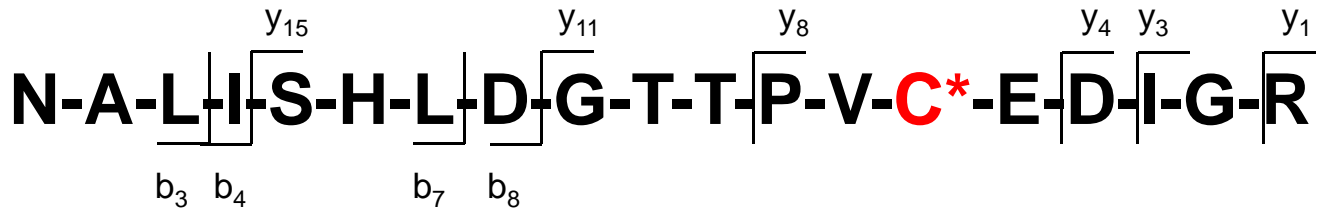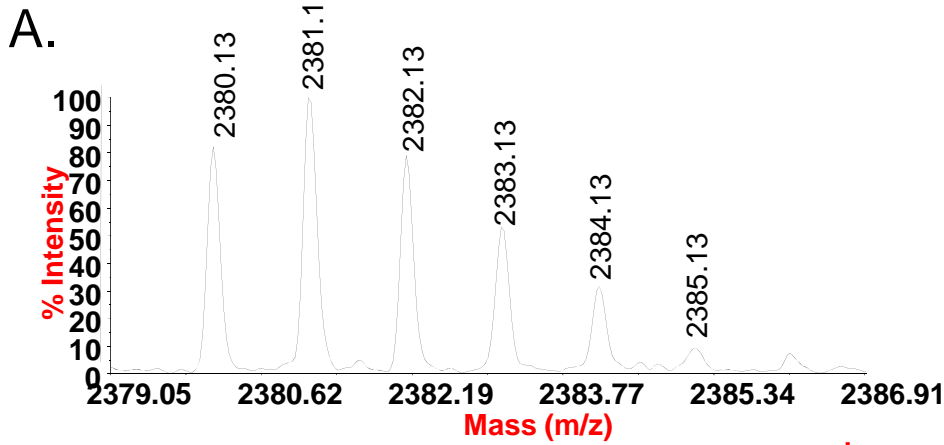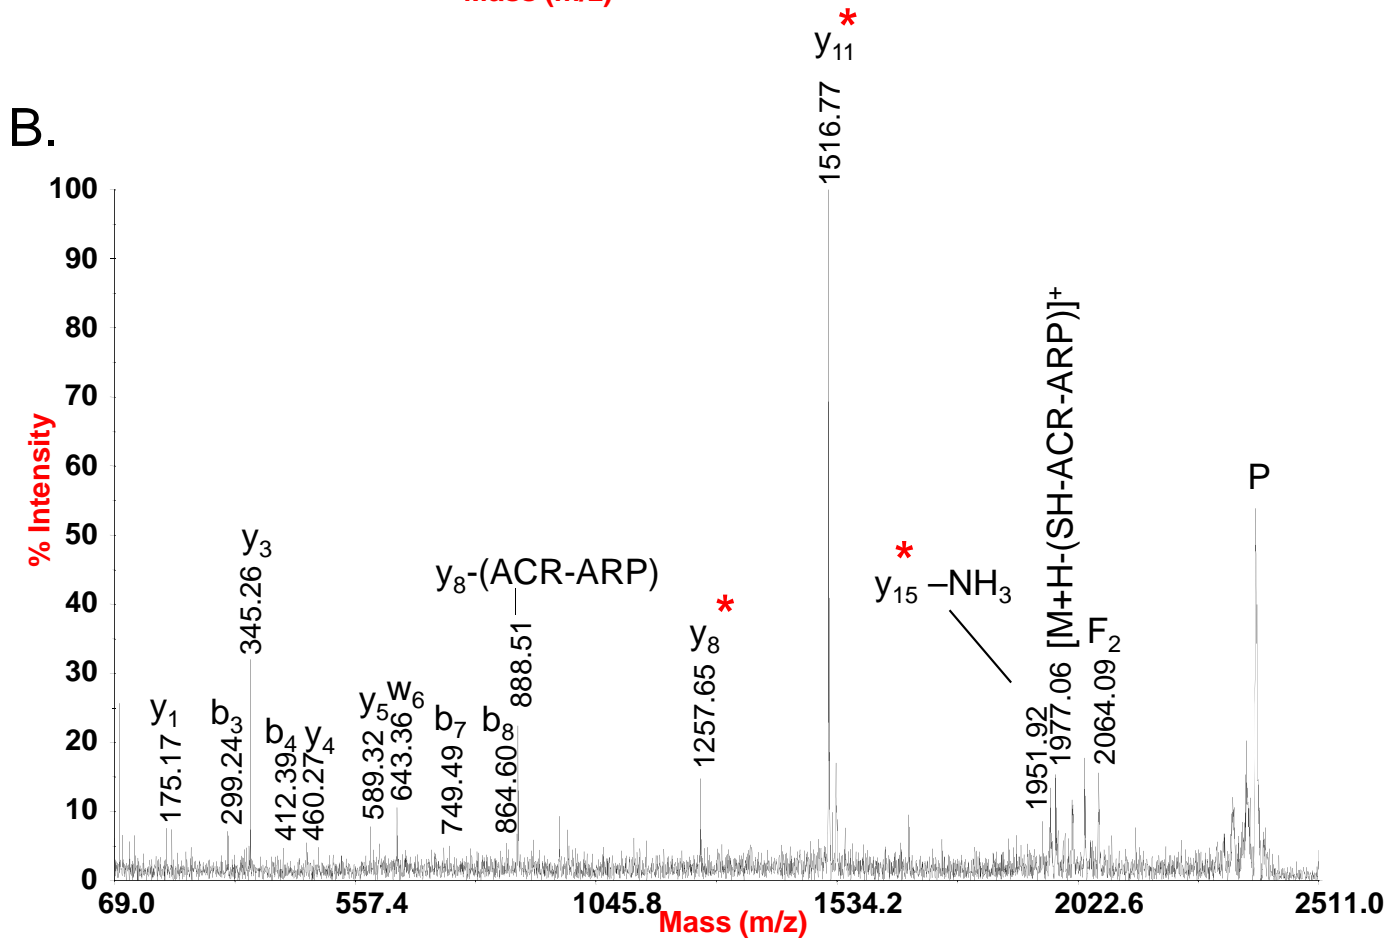

**Figure S23.** (A) Full mass spectrum and (B) MS/MS spectrum acquired by MALDI-TOF/TOF of the  $[M+H]^+$  ion of the ARP labeled, acrolein modified peptide NALISHLDGTTTPVC\*EDIGR; monoisotopic  $m/z_{\text{calc}}$  2380.14; accuracy  $\Delta(m/z) = -0.01$  Da



# QCR1\_RAT: Ubiquinol-cytochrome-c reductase complex core protein 1

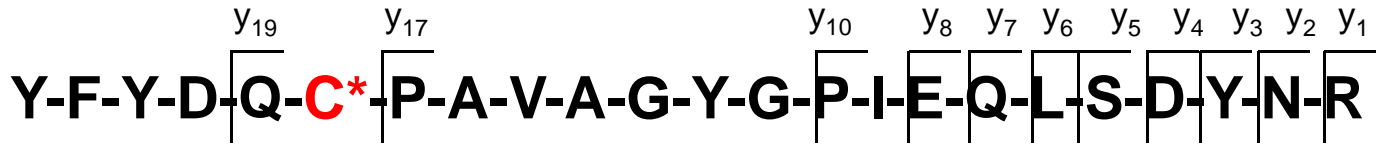

A.

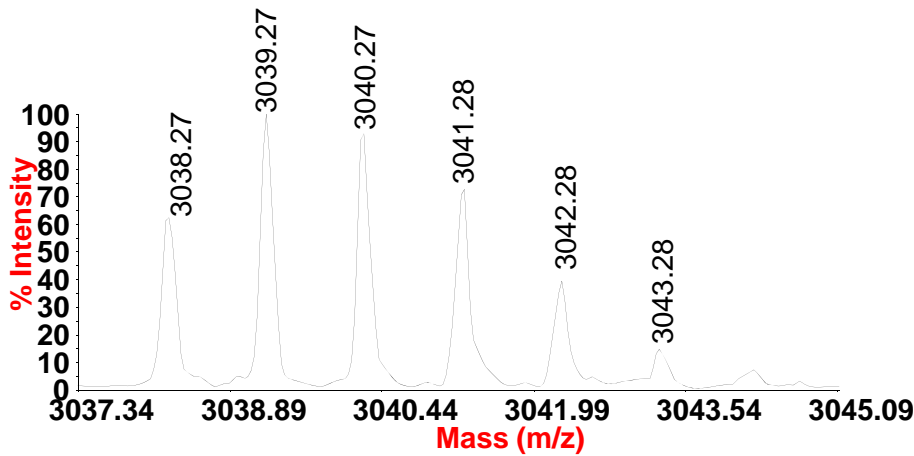

B.

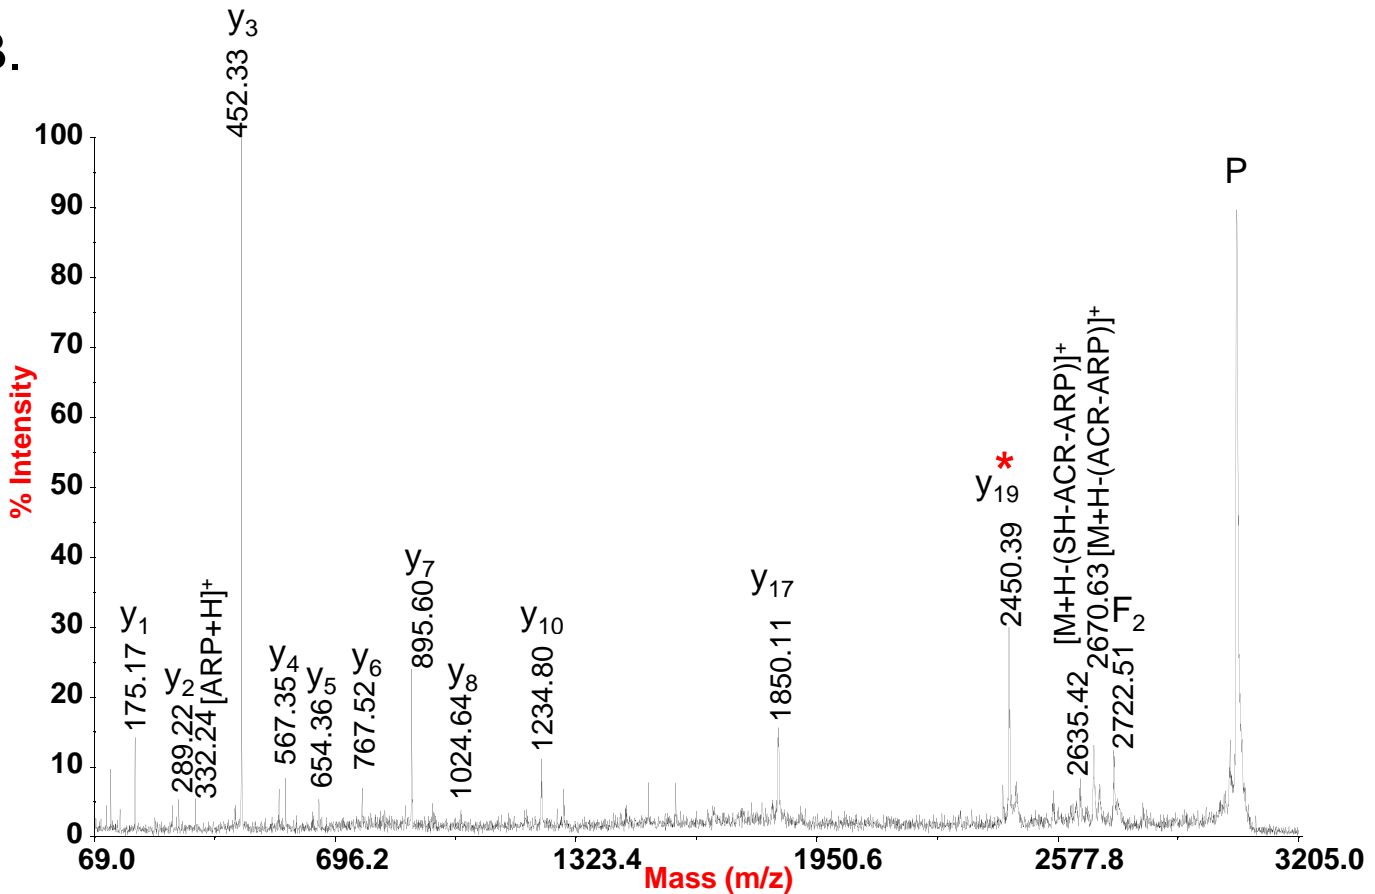

**Figure S24.** (A) Full mass spectrum and (B) MS/MS spectrum acquired by MALDI-TOF/TOF of the  $[M+H]^+$  ion of the ARP labeled, acrolein modified peptide YFYDQC\*PAVAGYGP...; monoisotopic  $m/z_{calc}$  3038.34; accuracy  $\Delta(m/z) = -0.07$  Da

# QCR2\_RAT: Ubiquinol-cytochrome-c reductase complex core protein 2

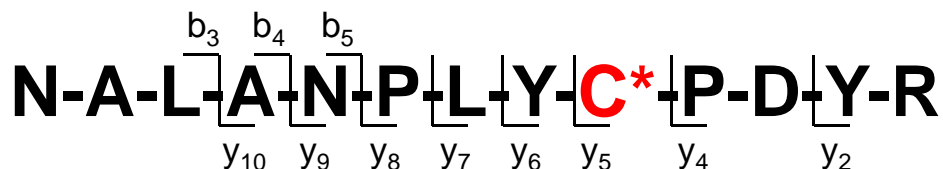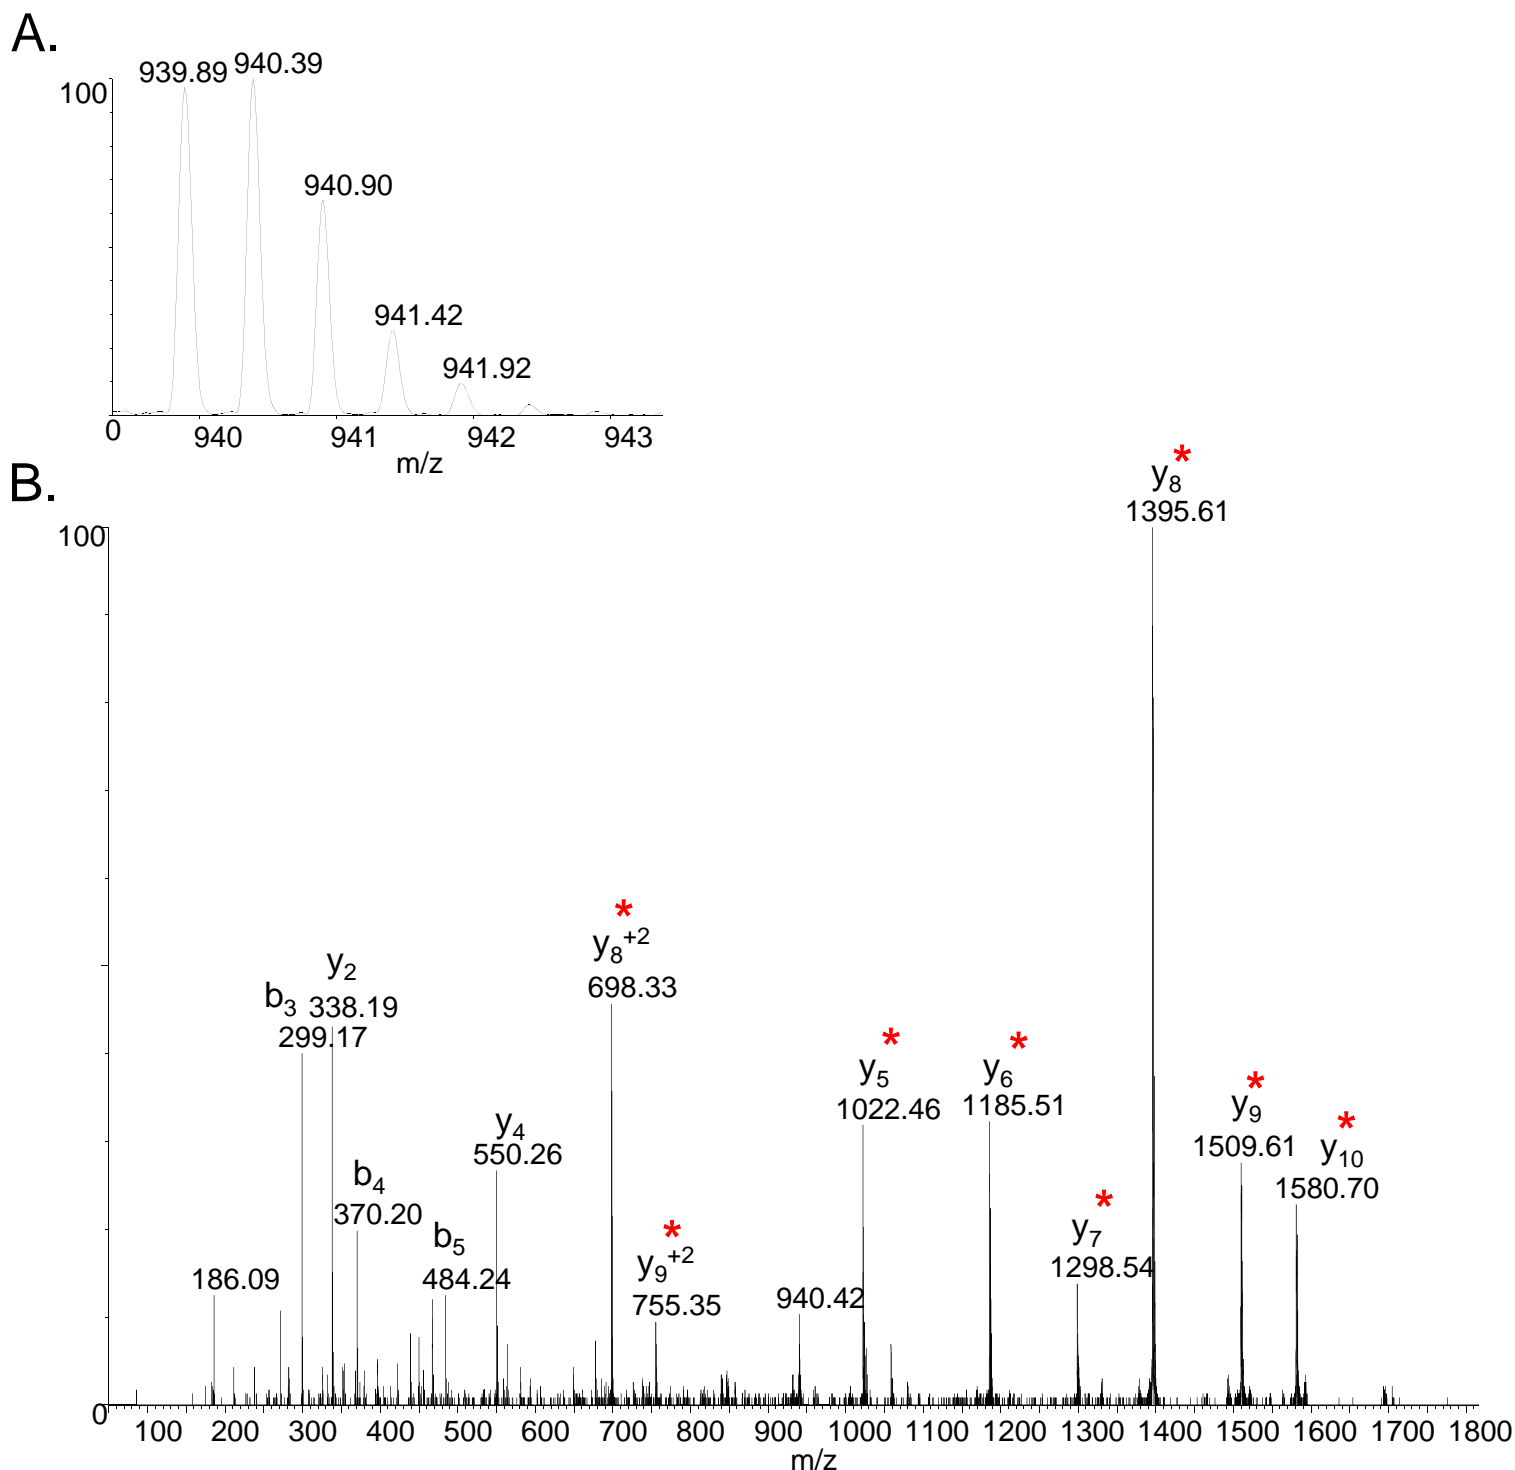

**Figure S25.** (A) Full mass spectrum and (B) MS/MS spectrum acquired by ESI-Q-TOF of the  $[M+2H]^{2+}$  ion of the ARP labeled, acrolein modified peptide NALANPLYC\*PDYR; monoisotopic  $m/z_{\text{calc}}$  939.93; accuracy  $\Delta(m/z) = -0.04$  Da

# QCR2\_RAT: Ubiquinol-cytochrome-c reductase complex core protein 2

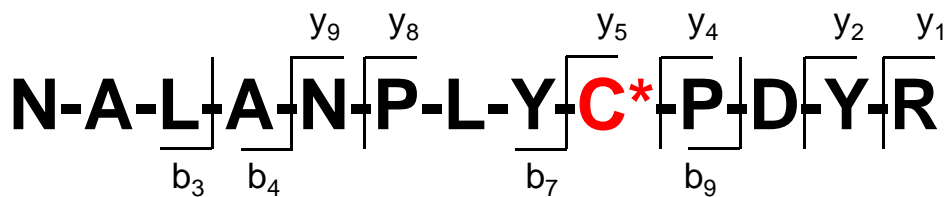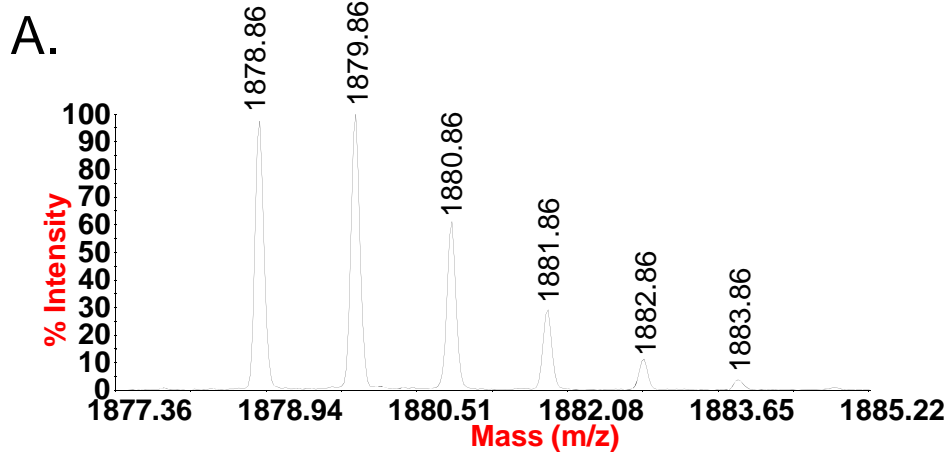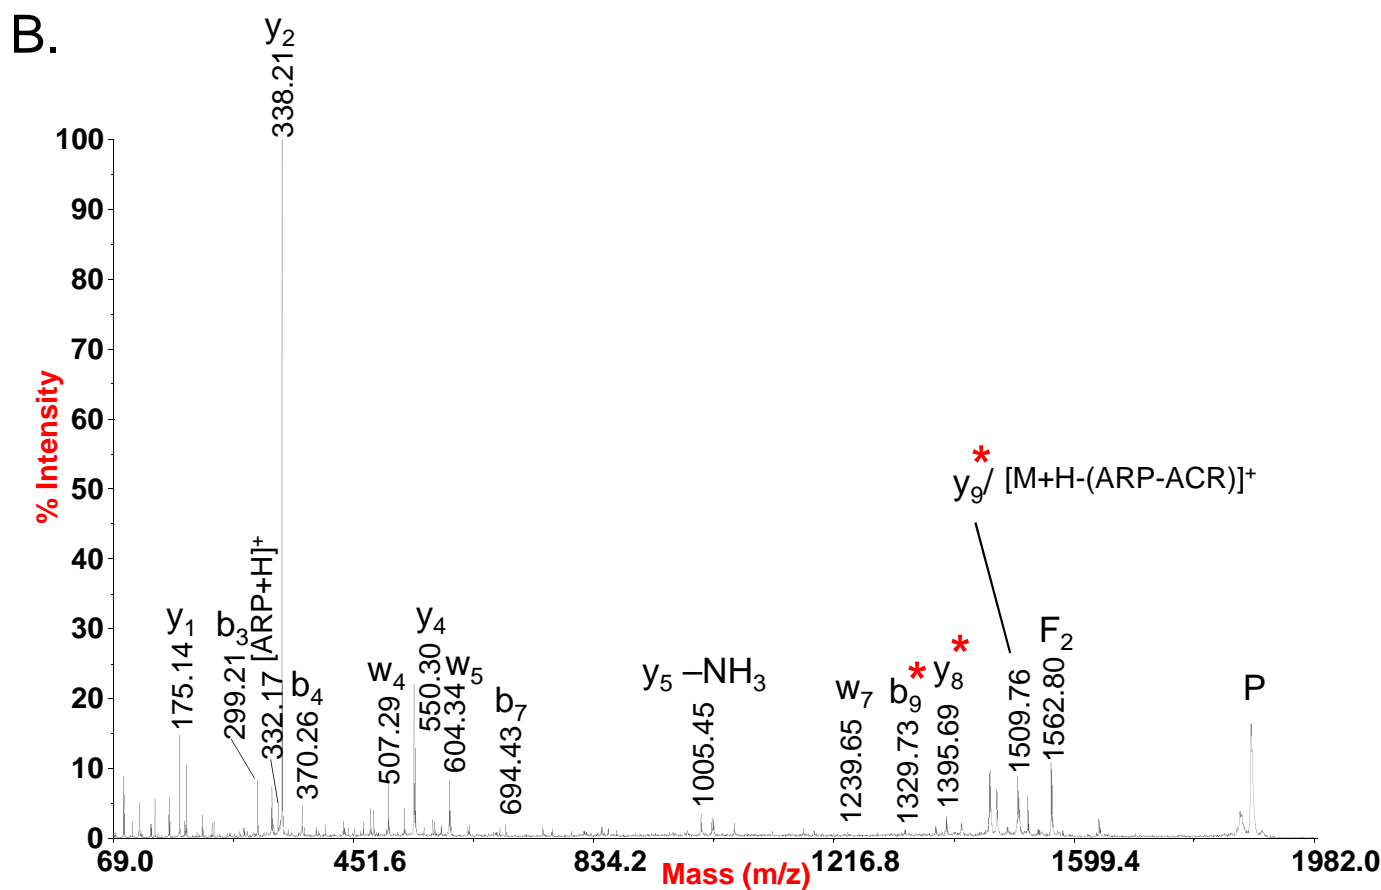

**Figure S26.** (A) Full mass spectrum and (B) MS/MS spectrum acquired by MALDI-TOF/TOF of the  $[M+H]^+$  ion of the ARP labeled, acrolein modified peptide NALANPLYC\*PDYR; monoisotopic  $m/z_{calc}$  1878.86; accuracy  $\Delta(m/z) = 0.00$  Da

# QCR2\_RAT: Ubiquinol-cytochrome-c reductase complex core protein 2

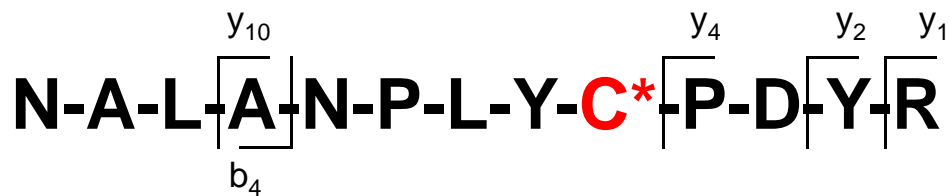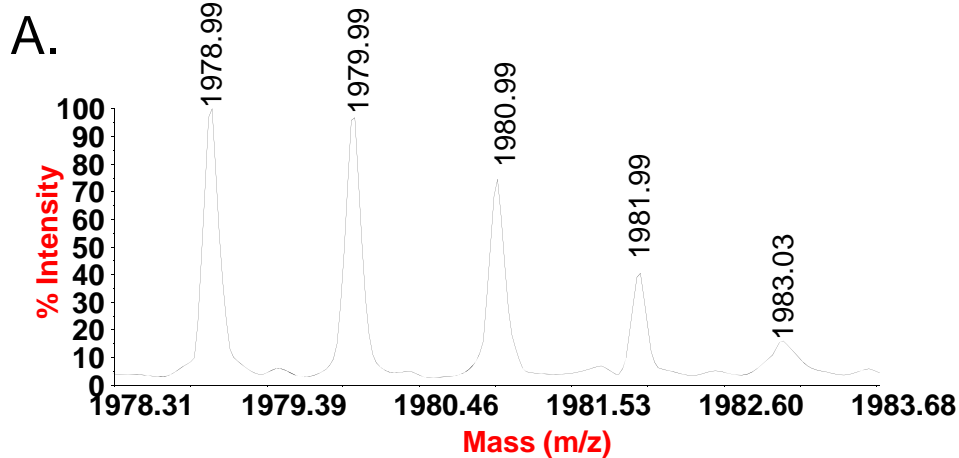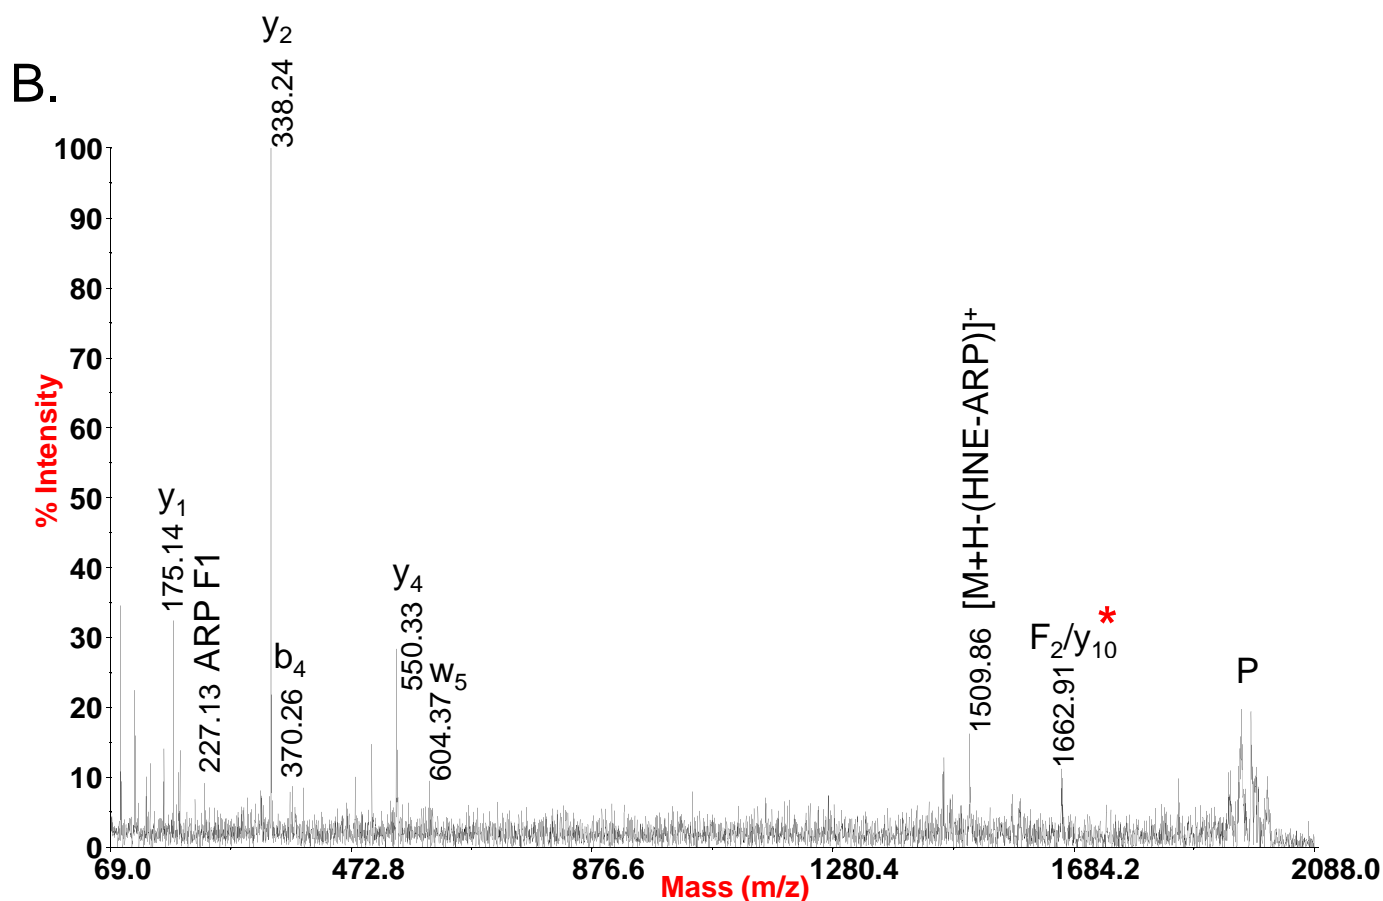

**Figure S27.** (A) Full mass spectrum and (B) MS/MS spectrum acquired by MALDI-TOF/TOF of the  $[M+H]^+$  ion of the ARP labeled, HNE modified peptide NALANPLYC\*PDYR; monoisotopic  $m/z_{\text{calc}}$  1978.95; accuracy  $\Delta(m/z) = 0.04$  Da

# QCR2\_RAT: Ubiquinol-cytochrome-c reductase complex core protein 2

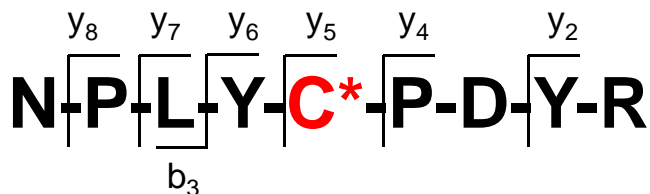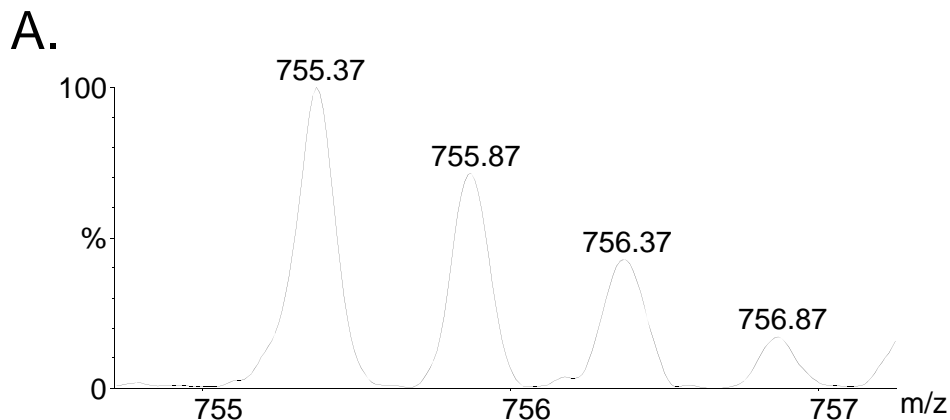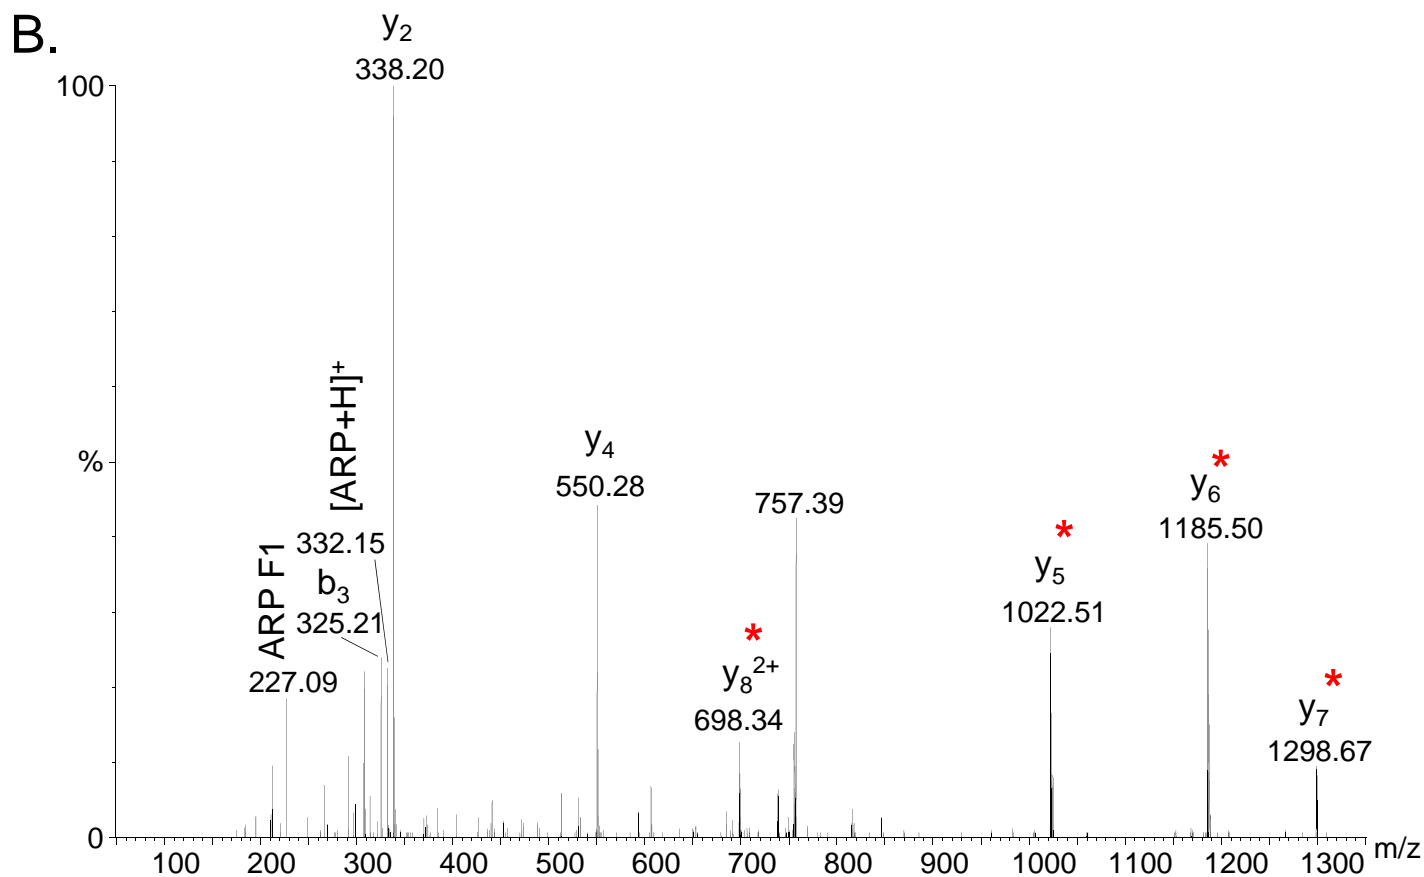

**Figure S28.** (A) Full mass spectrum and (B) MS/MS spectrum acquired by ESI-Q-TOF of the  $[M+2H]^{2+}$  ion of the ARP labeled, acrolein modified peptide NPLYC\*PDYR; monoisotopic  $m/z_{calc}$  755.33; accuracy  $\Delta(m/z) = 0.04$  Da

# DHSA\_RAT: Succinate dehydrogenase [ubiquinone] flavoprotein subunit

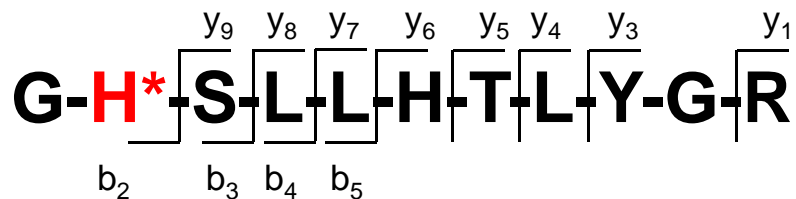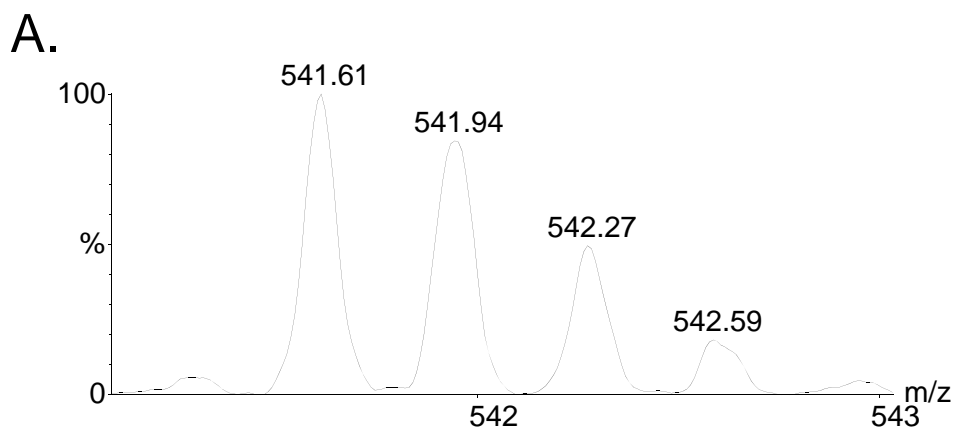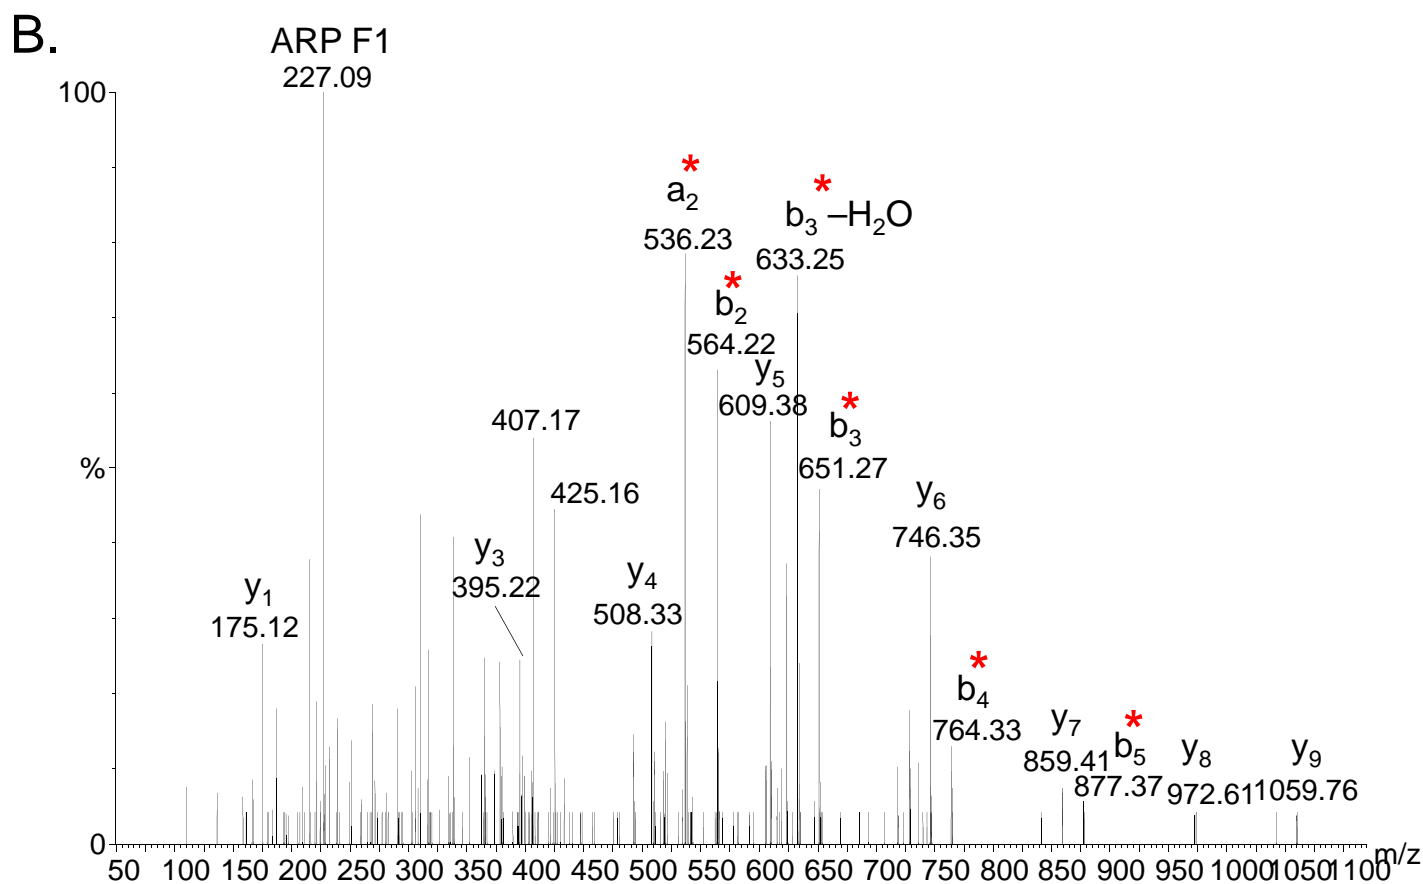

**Figure S29.** (A) Full mass spectrum and (B) MS/MS spectrum acquired by ESI-Q-TOF of the  $[M+3H]^{3+}$  ion of the ARP labeled, acrolein modified peptide GH\***S**LLHTLYGR; monoisotopic  $m/z_{\text{calc}}$  541.61; accuracy  $\Delta(m/z) = 0.00$  Da

# DHSA\_RAT: Succinate dehydrogenase [ubiquinone] flavoprotein subunit

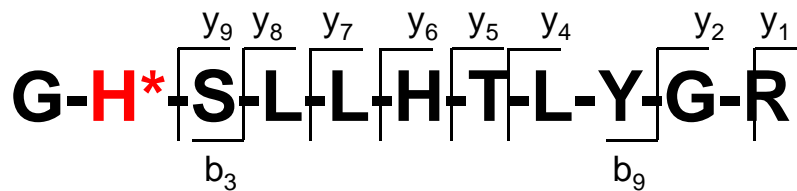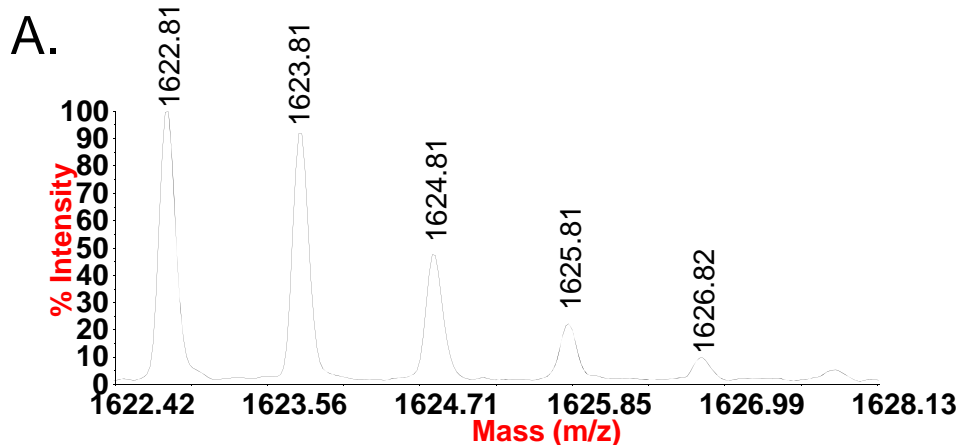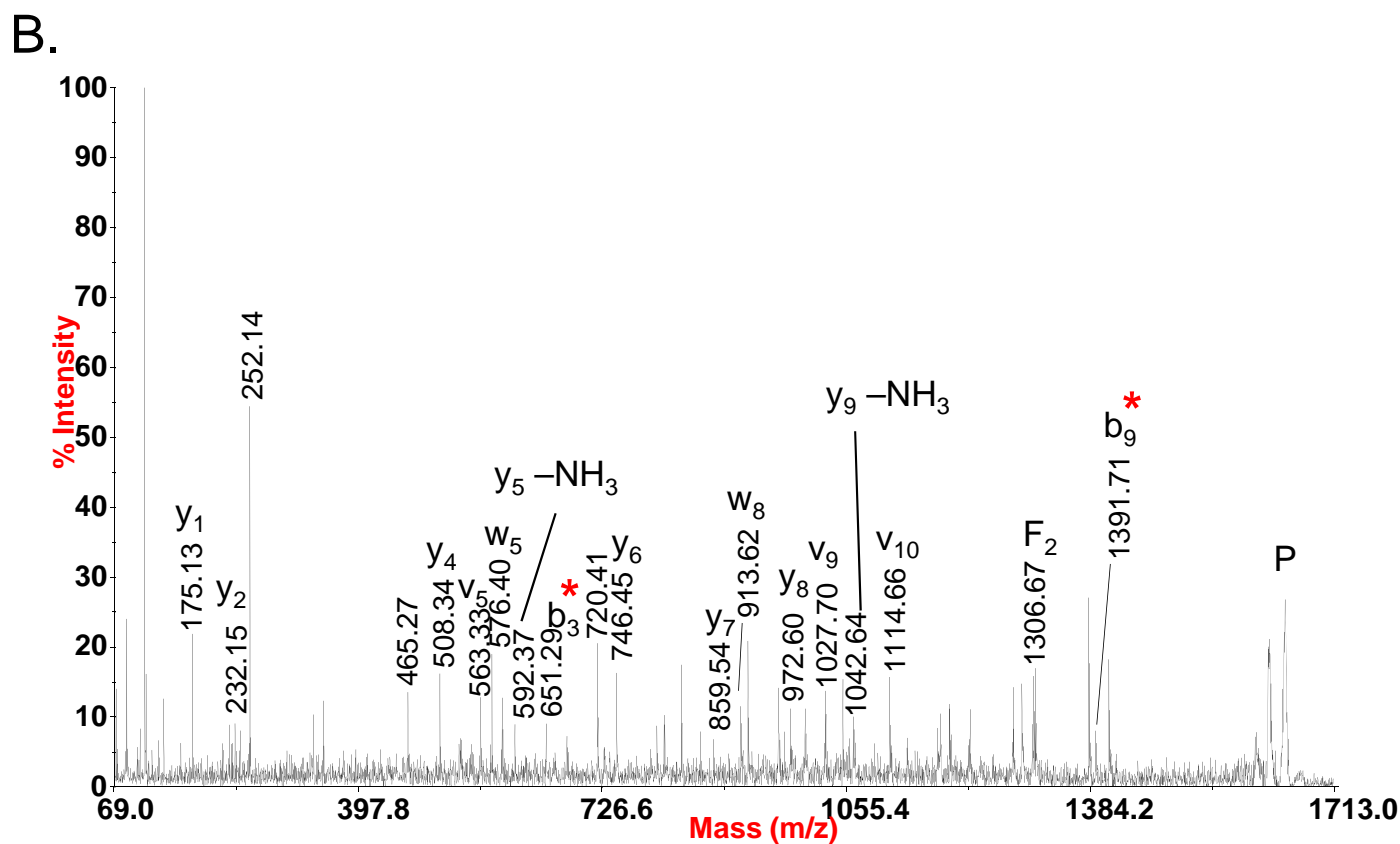

**Figure S30.** (A) Full mass spectrum and (B) MS/MS spectrum acquired by MALDI-TOF/TOF of the  $[M+H]^+$  ion of the ARP labeled, acrolein modified peptide GH\***S**LLHTLYGR; monoisotopic  $m/z_{\text{calc}}$  1622.82; accuracy  $\Delta(m/z) = -0.01$  Da

# Q6IRH6\_RAT: Slc25a3 protein

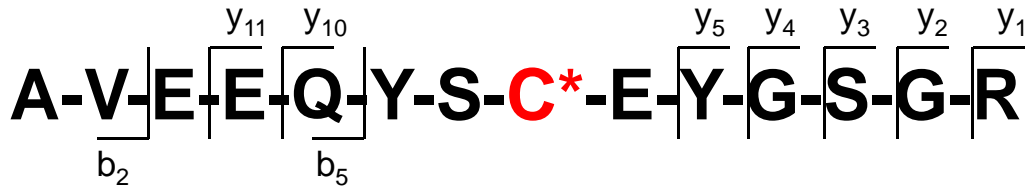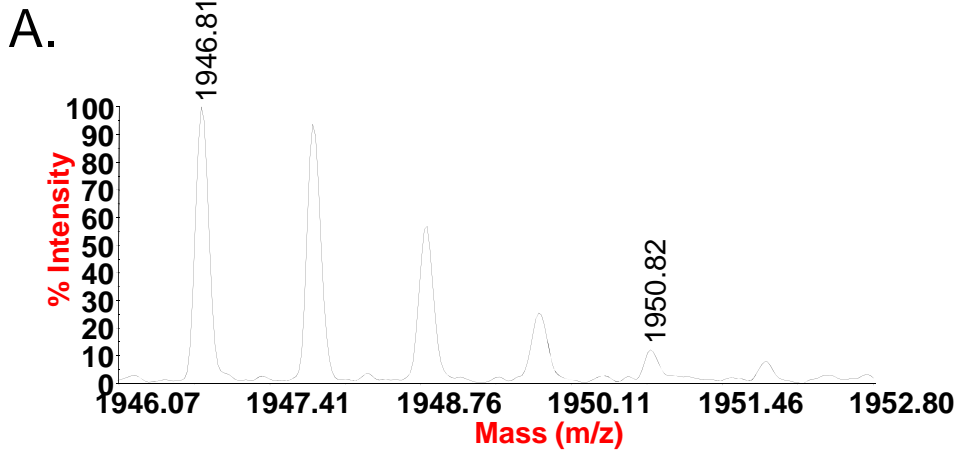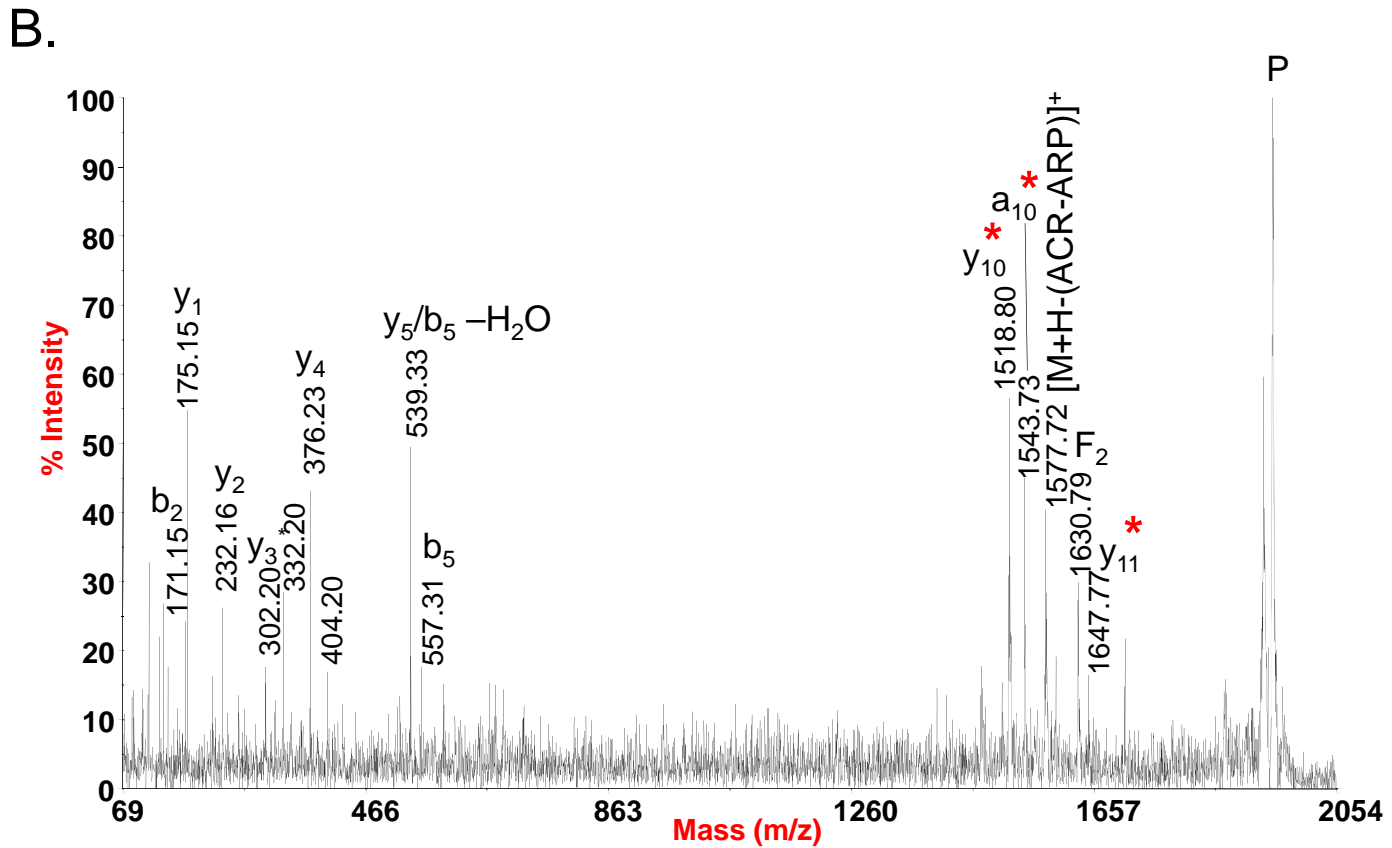

**Figure S31.** (A) Full mass spectrum and (B) MS/MS spectrum acquired by MALDI-TOF/TOF of the  $[M+H]^+$  ion of the ARP labeled, acrolein modified peptide AVEEQYSC\*EYGSGR; monoisotopic  $m/z_{calc}$  1946.80; accuracy  $\Delta(m/z) = 0.01$  Da



# ADT1\_RAT: ADP/ATP translocase 1

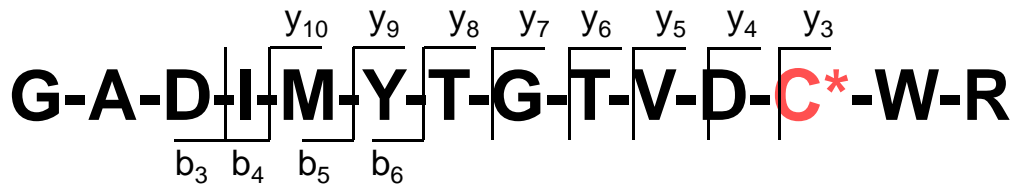

A.

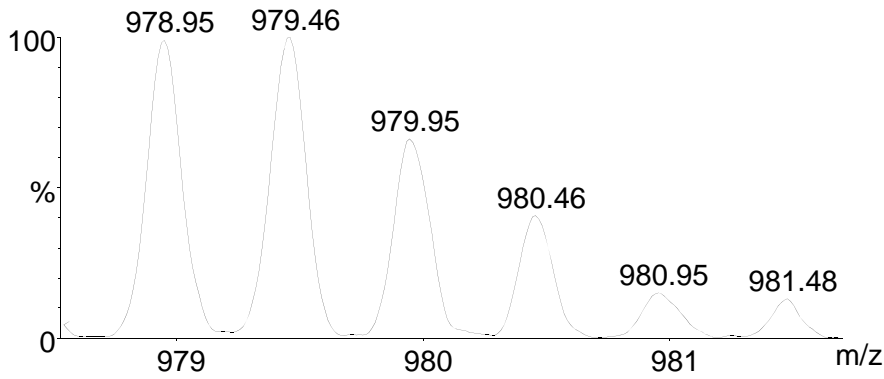

B.

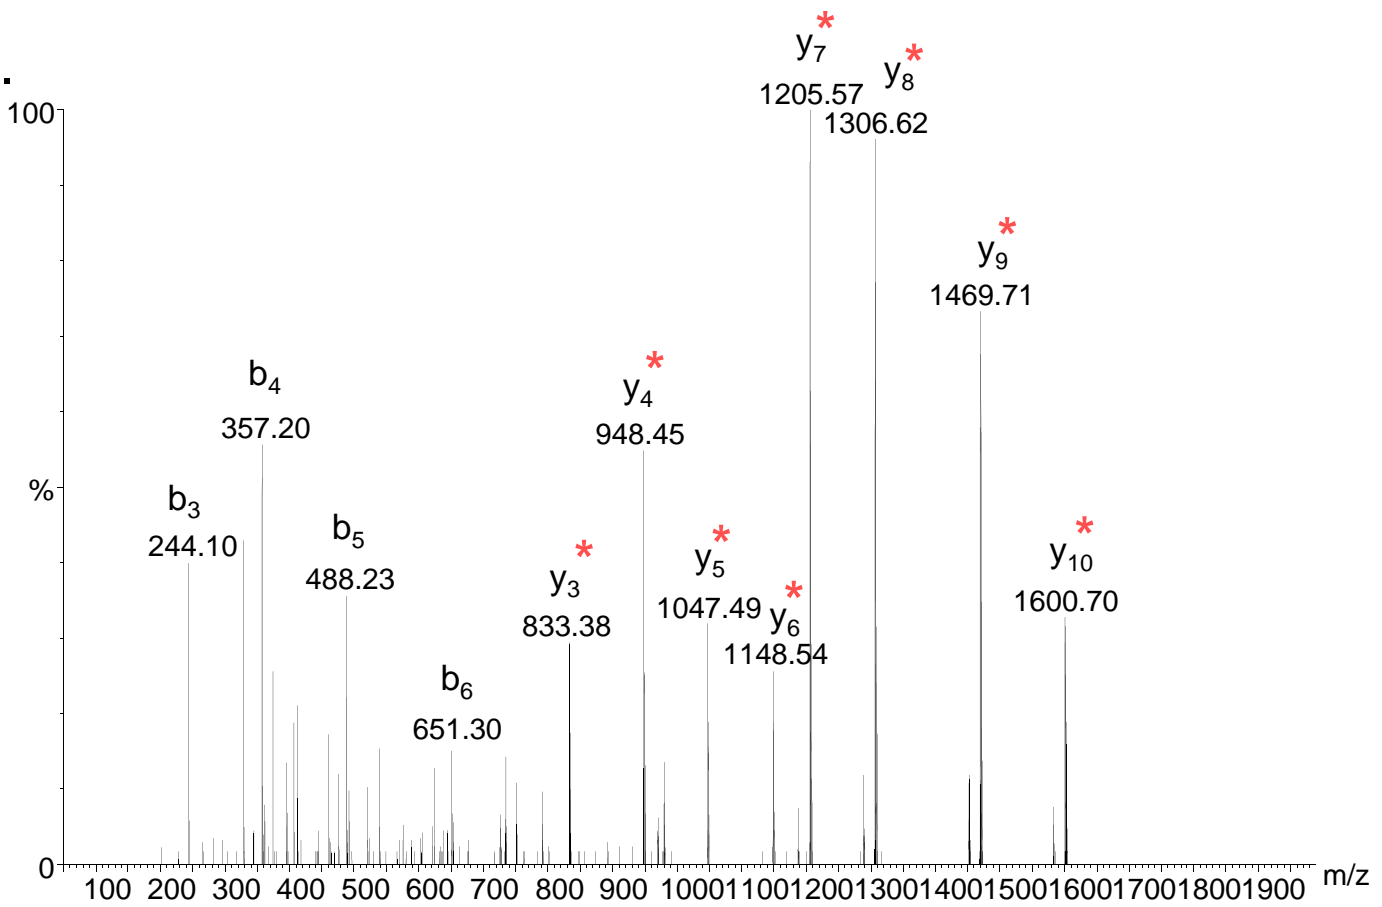

**Figure S32.** (A) Full mass spectrum and (B) MS/MS spectrum acquired by ESI-Q-TOF of the  $[M+2H]^{2+}$  ion of the ARP labeled, acrolein modified peptide GADIMYTGTVD-C\*WR; monoisotopic  $m/z_{\text{calc}}$  978.92; accuracy  $\Delta(m/z) = 0.03$  Da

# ADT1\_RAT: ADP/ATP translocase 1

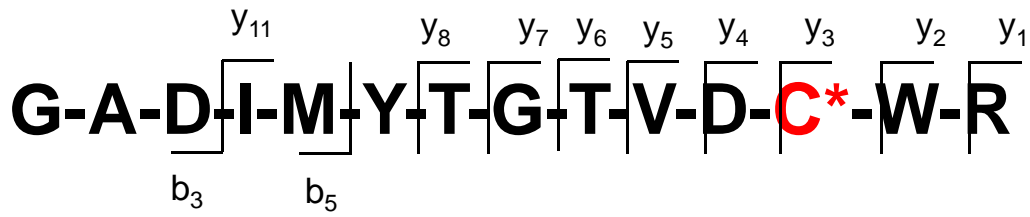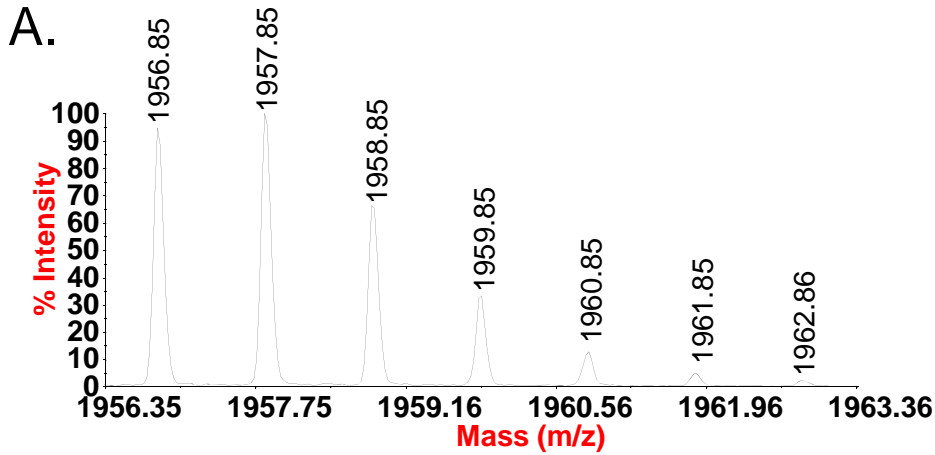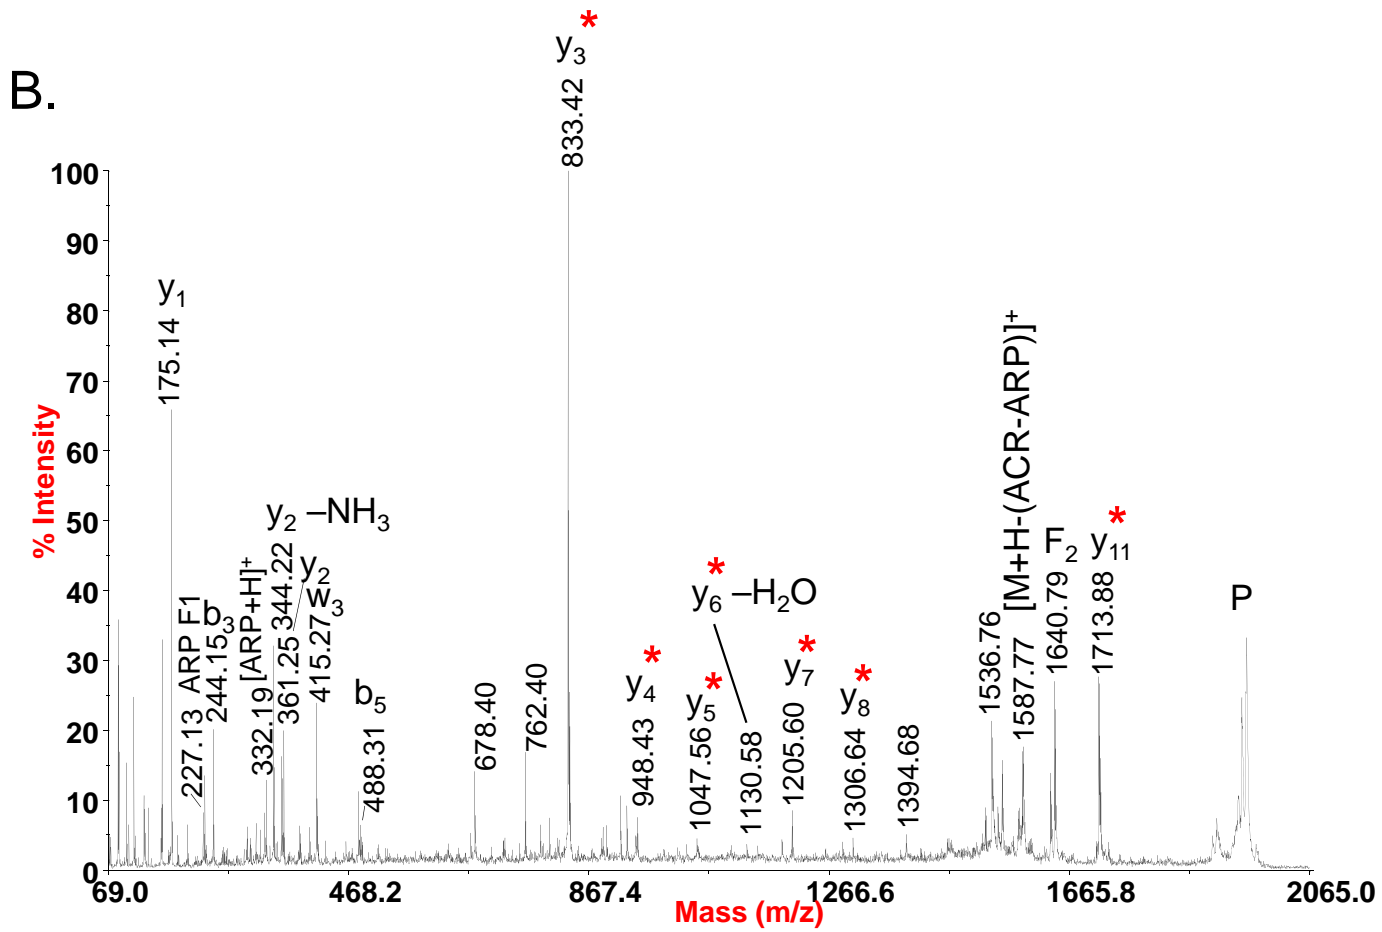

**Figure S33.** (A) Full mass spectrum and (B) MS/MS spectrum acquired by MALDI-TOF/TOF of the  $[M+H]^+$  ion of the ARP labeled, acrolein modified peptide GADIMYTGTVDC\*WR; monoisotopic  $m/z_{\text{calc}}$  1956.84; accuracy  $\Delta(m/z) = 0.01$  Da

# ADT1\_RAT: ADP/ATP translocase 1

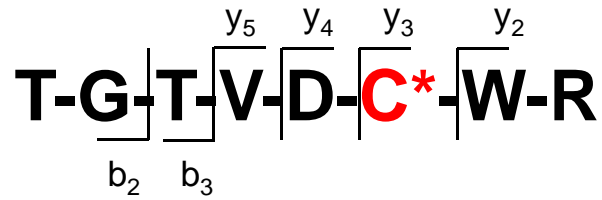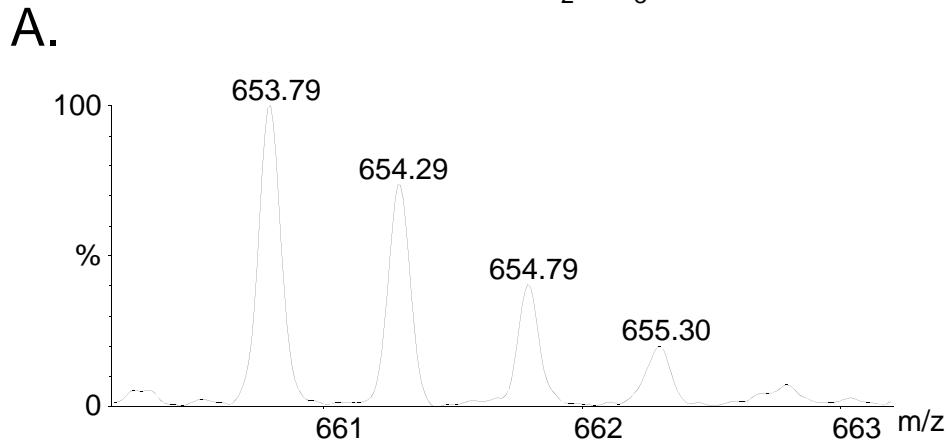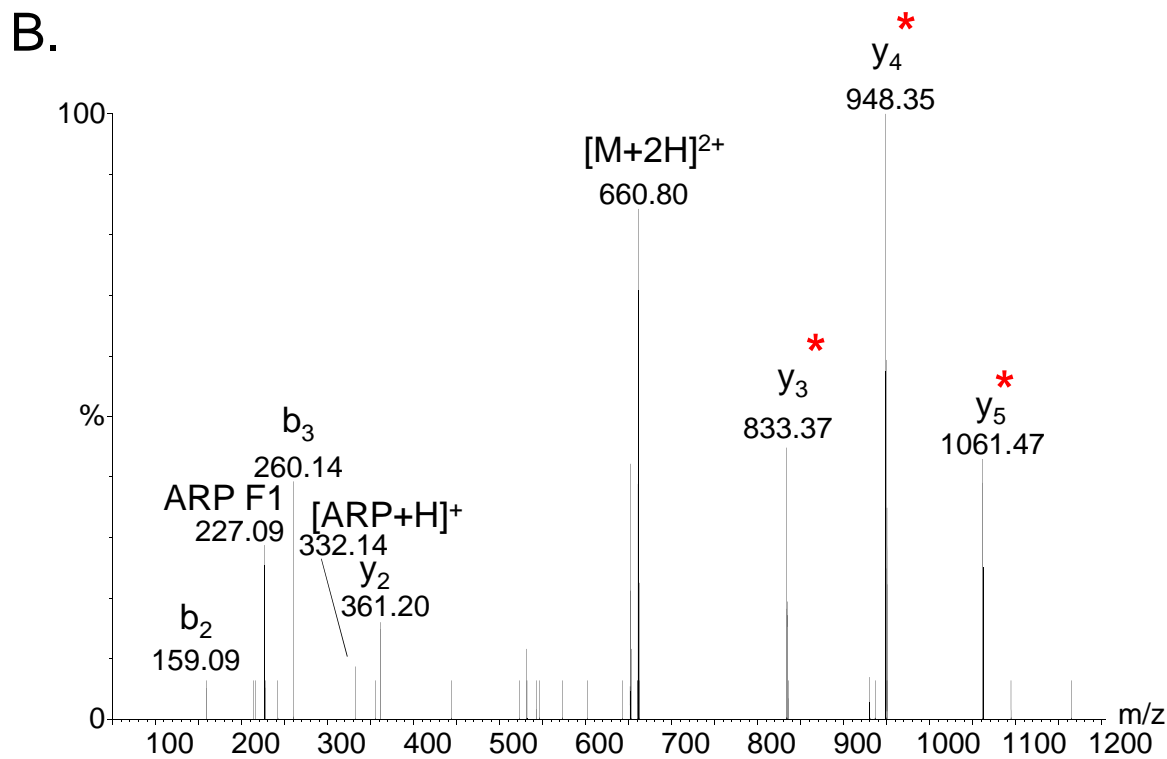

**Figure S34.** (A) Full mass spectrum and (B) MS/MS spectrum acquired by ESI-Q-TOF of the  $[M+2H]^{2+}$  ion of the ARP labeled, acrolein modified peptide TGTVD $C^*$ WR; monoisotopic  $m/z_{calc}$  653.79; accuracy  $\Delta(m/z) = 0.00$  Da

# ADT1\_RAT: ADP/ATP translocase 1

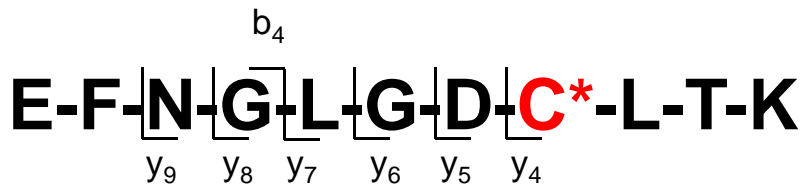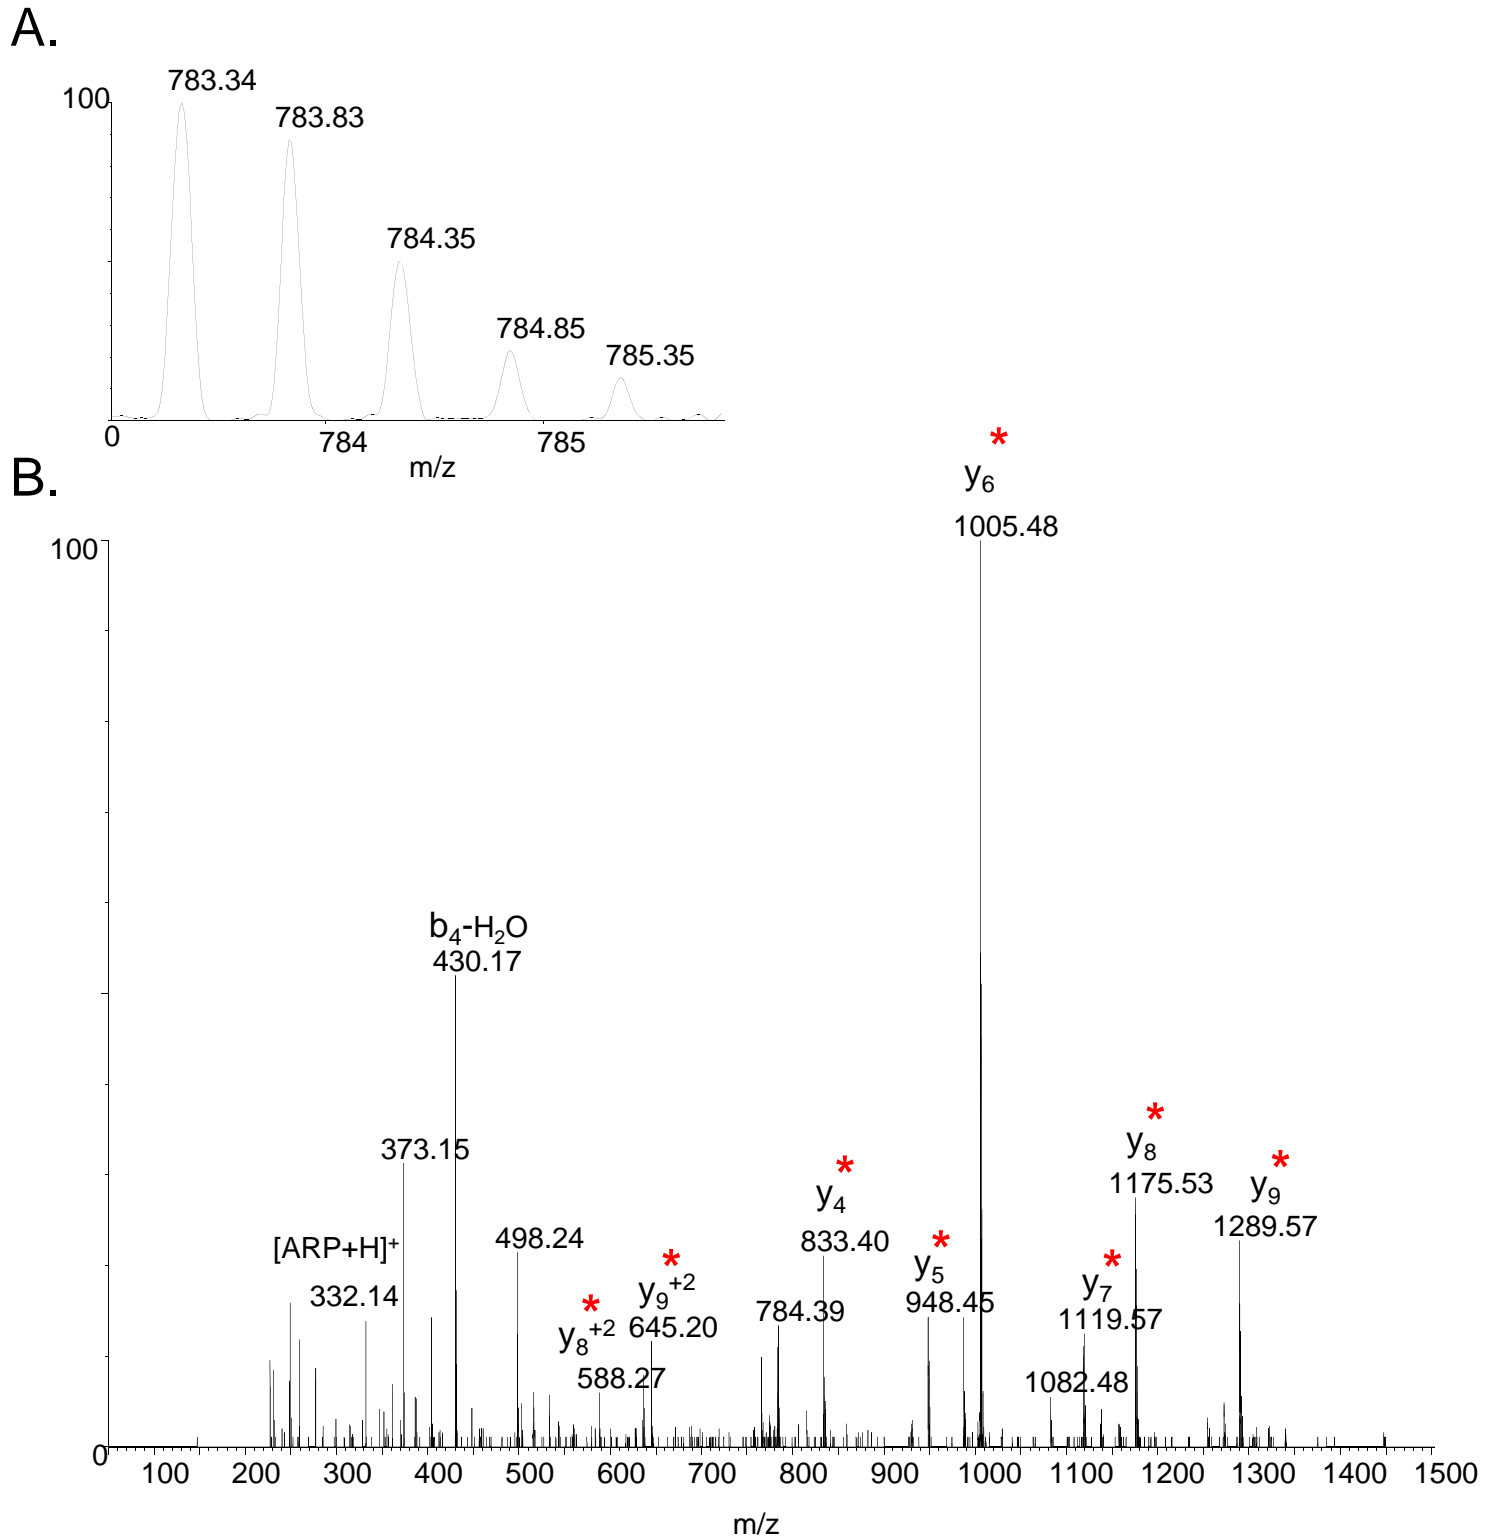

**Figure S35.** (A) Full mass spectrum and (B) MS/MS spectrum acquired by ESI-Q-TOF of the  $[M+2H]^{2+}$  ion of the ARP labeled, acrolein modified peptide EFNGLGDC\*LTK; monoisotopic  $m/z_{calc}$  783.36; accuracy  $\Delta(m/z) = -0.02$  Da

# ADT1\_RAT: ADP/ATP translocase 1

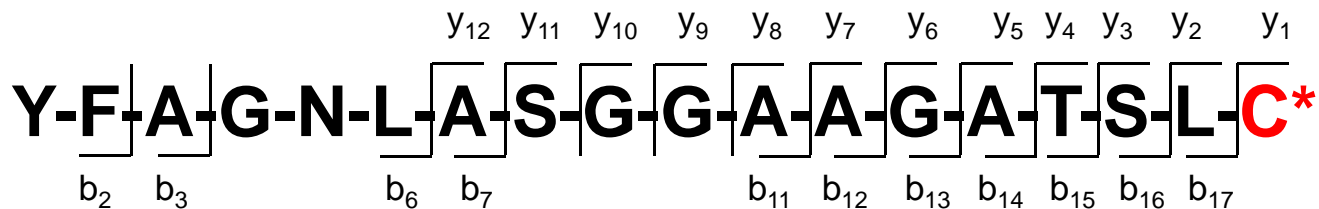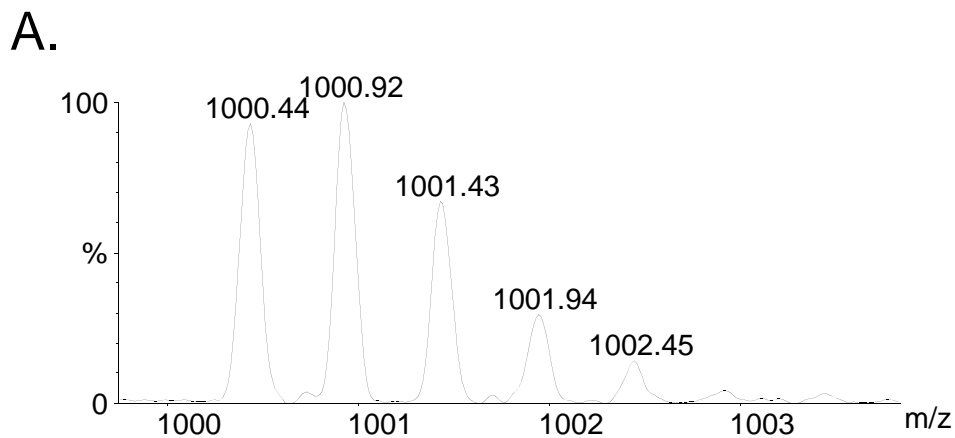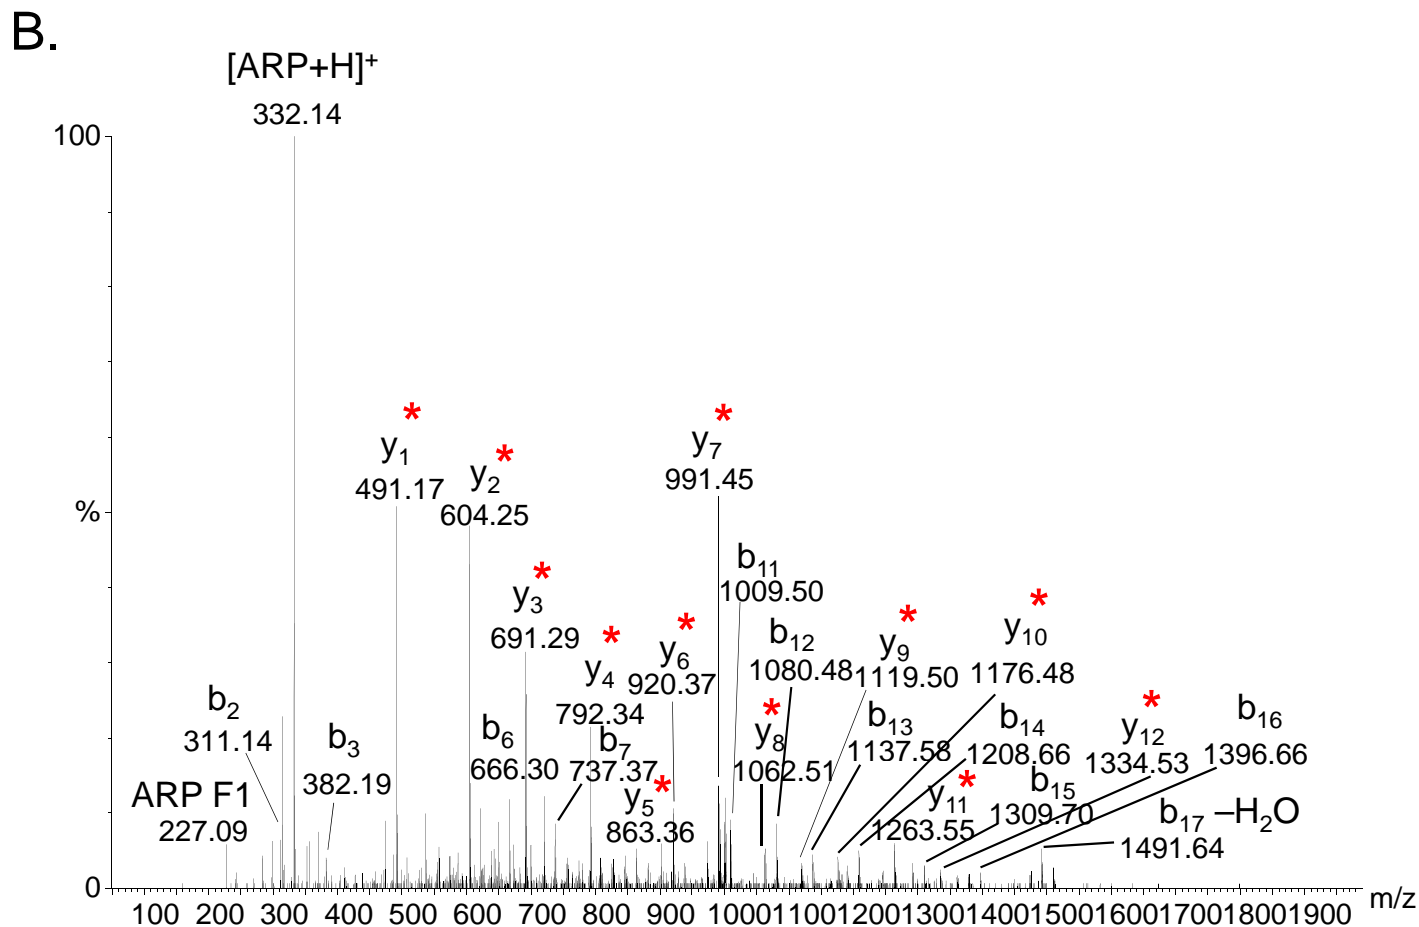

**Figure S36.** (A) Full mass spectrum and (B) MS/MS spectrum acquired by ESI-Q-TOF of the  $[M+2H]^{2+}$  ion of the ARP labeled, acrolein modified peptide YFAGNLSGGAAGATSLC\*; monoisotopic  $m/z_{\text{calc}}$  1000.45; accuracy  $\Delta(m/z) = -0.01$  Da

# ADT2\_RAT: ADP/ATP translocase 2

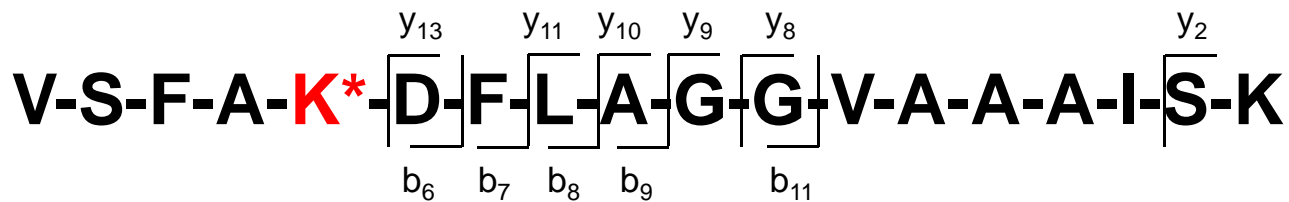

A.

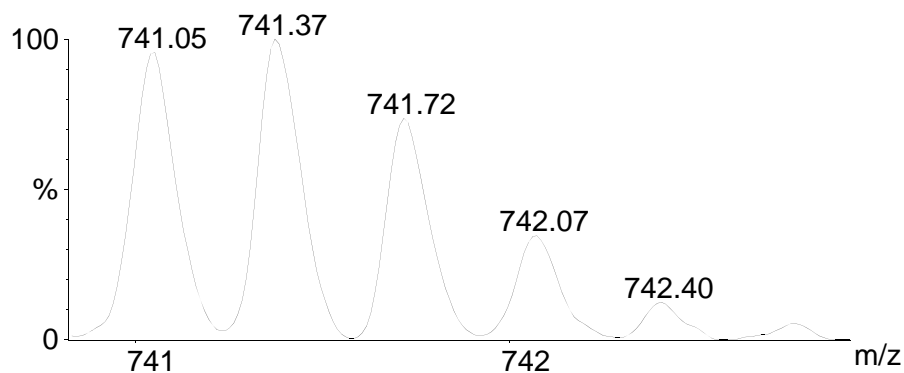

B.

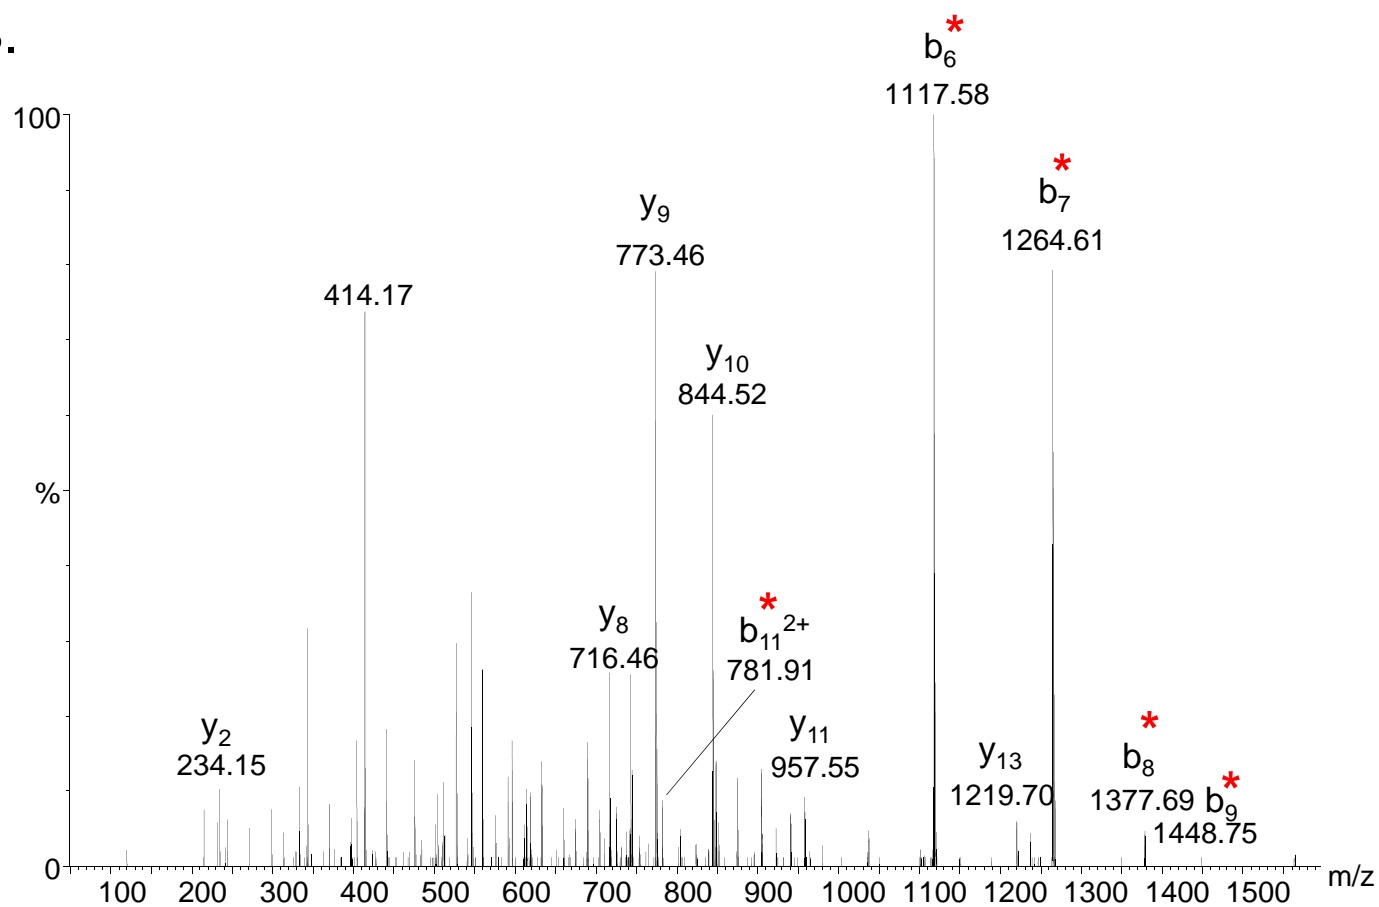

**Figure S37.** (A) Full mass spectrum and (B) MS/MS spectrum acquired by ESI-Q-TOF of the  $[M+3H]^{3+}$  ion of the ARP labeled, HNE modified peptide V-S-F-A-K\*DFLAGGVA-A-I-S-K; monoisotopic  $m/z_{\text{calc}}$  741.07; accuracy  $\Delta(m/z) = -0.02$  Da

# ADT1\_RAT: ADP/ATP translocase 1

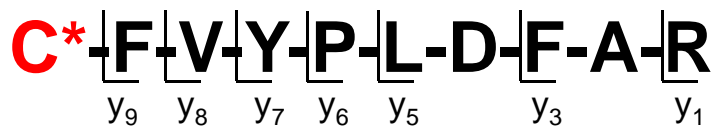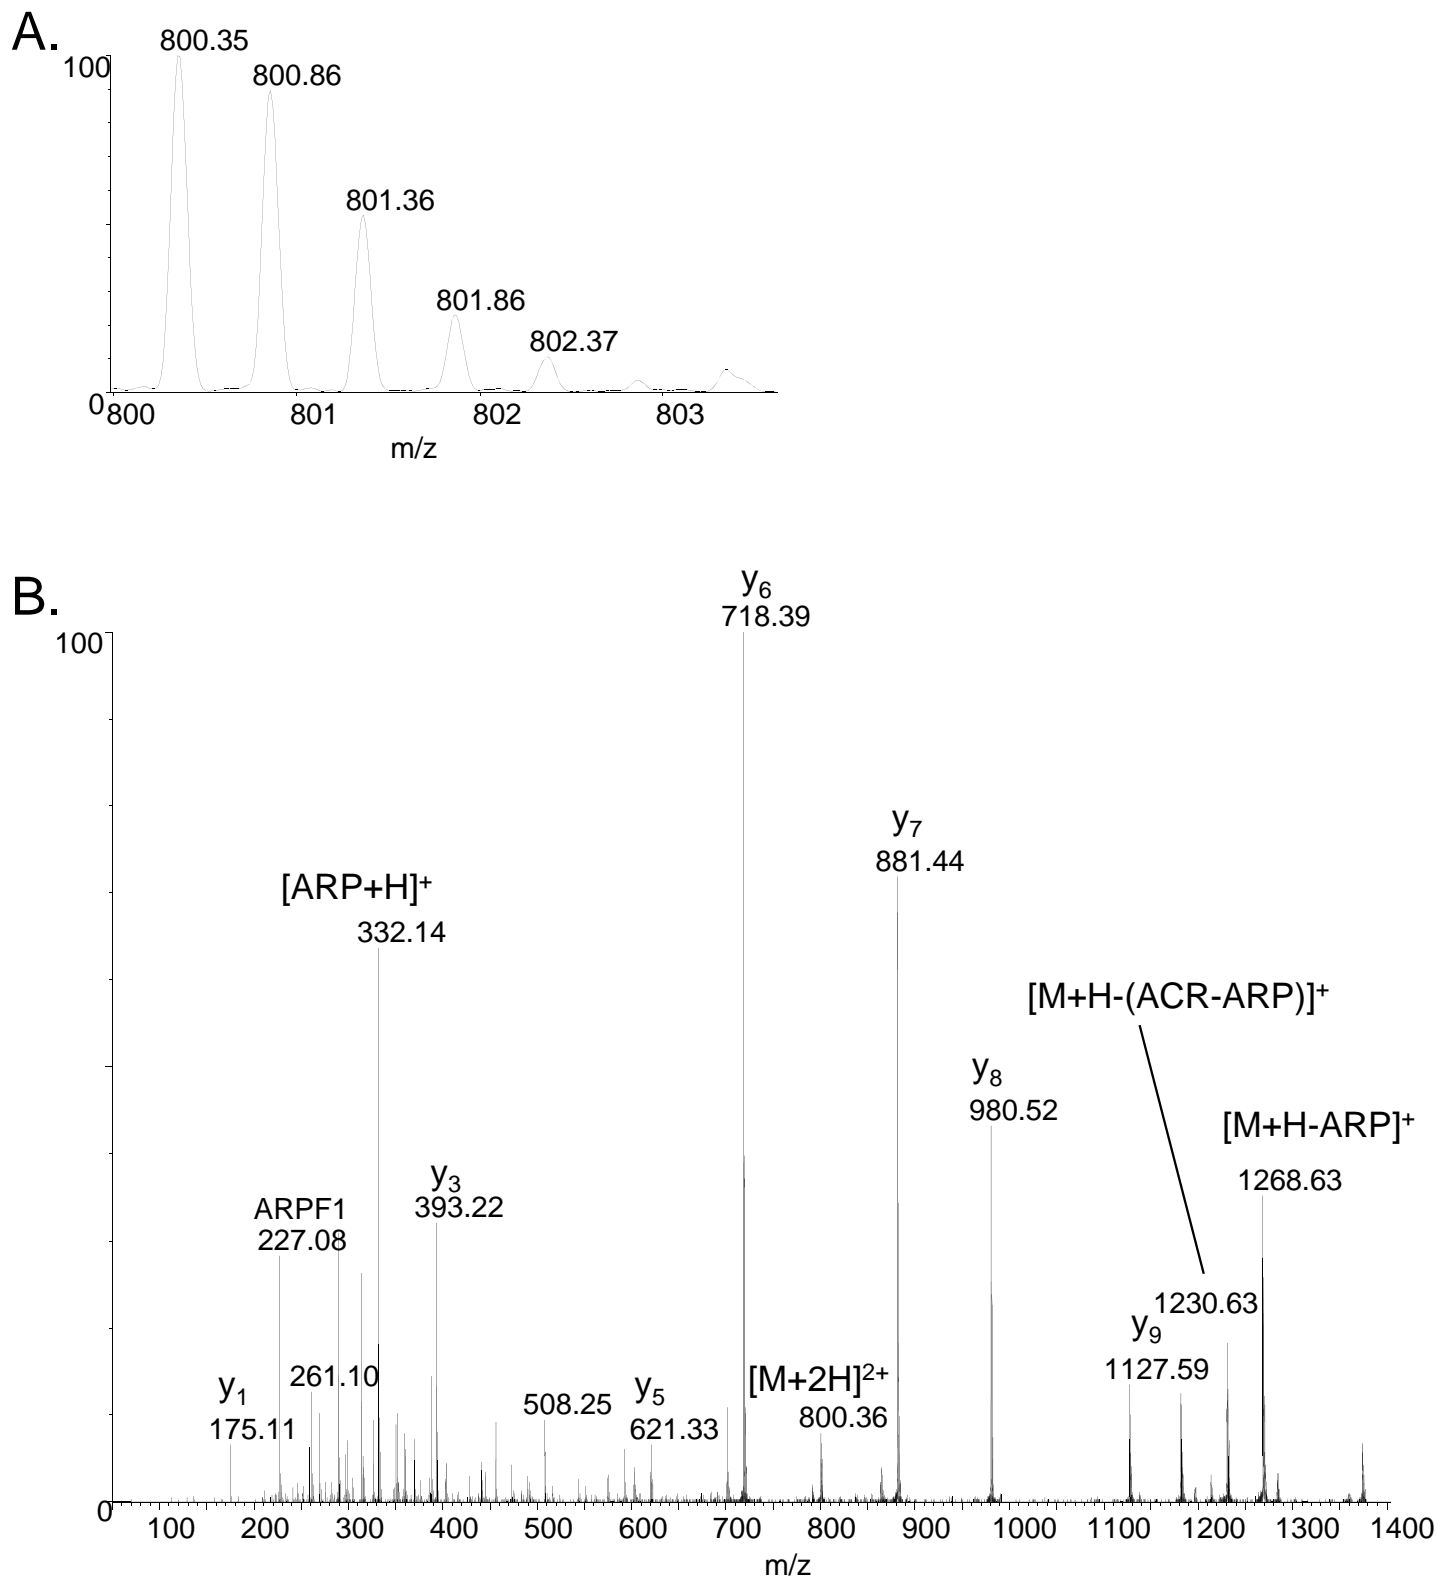

**Figure S38.** (A) Full mass spectrum and (B) MS/MS spectrum acquired by ESI-Q-TOF of the  $[M+2H]^{2+}$  ion of the ARP labeled, acrolein modified peptide C\*FVYPLDFAR; monoisotopic  $m/z_{\text{calc}}$  800.38; accuracy  $\Delta(m/z) = -0.03$  Da

# ADT1\_RAT: ADP/ATP translocase 1

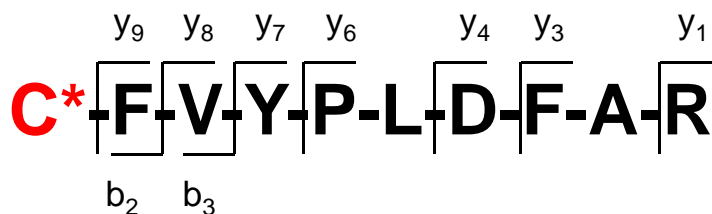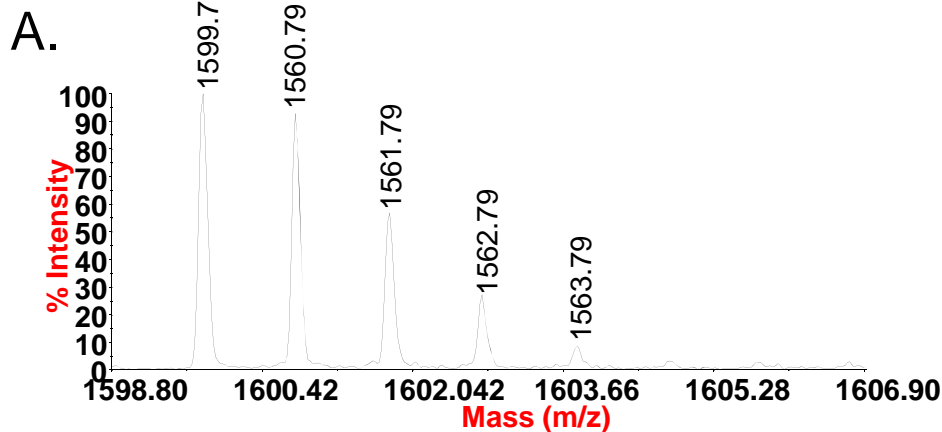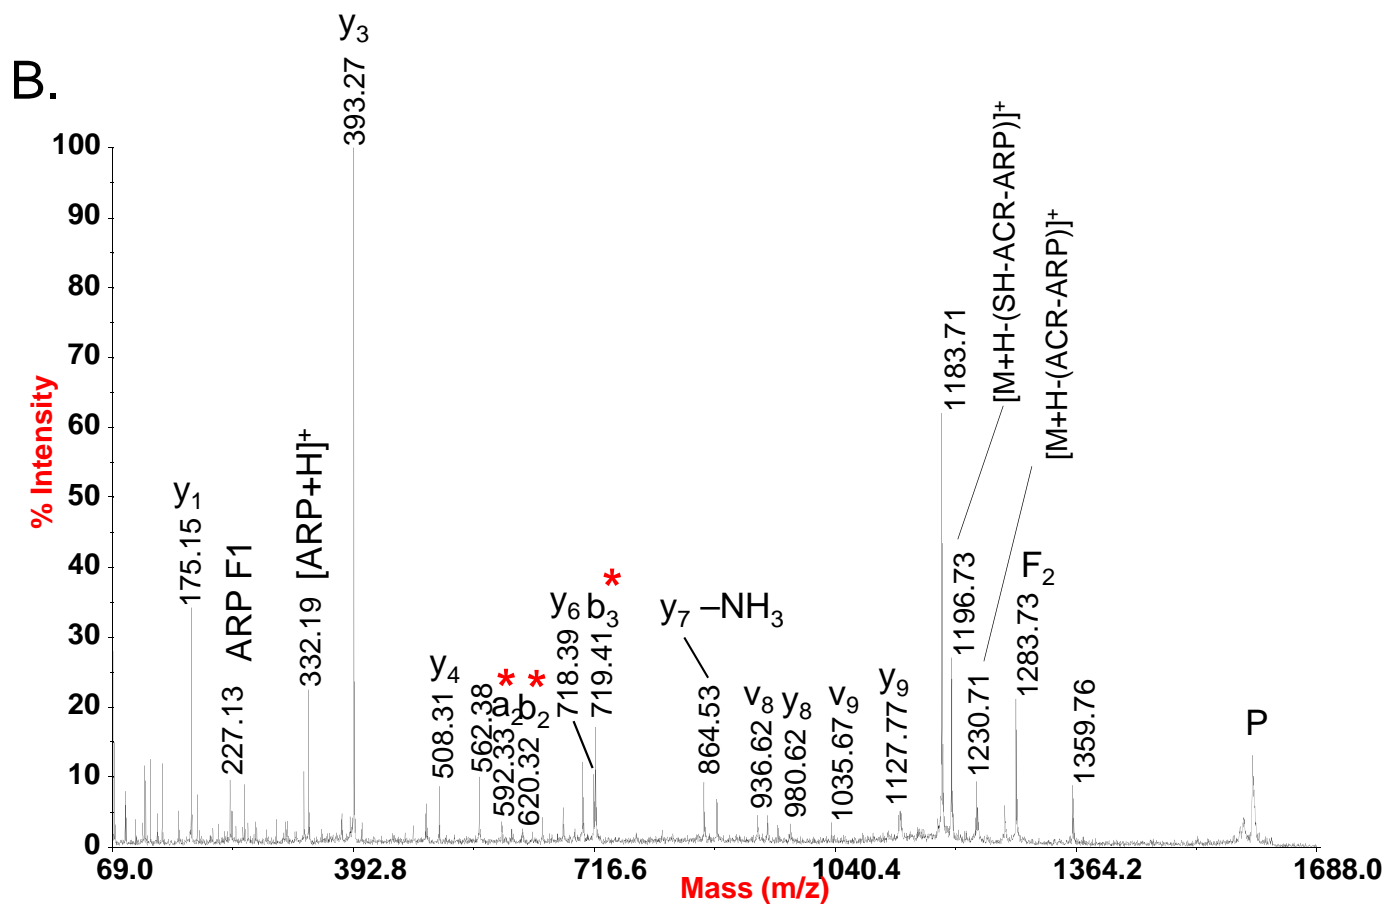

**Figure S39.** (A) Full mass spectrum and (B) MS/MS spectrum acquired by MALDI-TOF/TOF of the [M+H]<sup>+</sup> ion of the ARP labeled, acrolein modified peptide C\*FVYPLDFAR; monoisotopic  $m/z_{calc}$  1599.74; accuracy  $\Delta(m/z) = 0.05$  Da



# ADT1\_RAT: ADP/ATP translocase 1

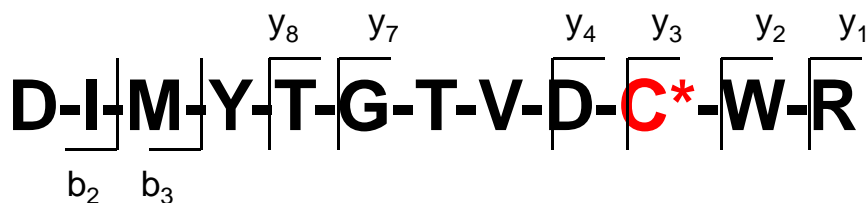

A.

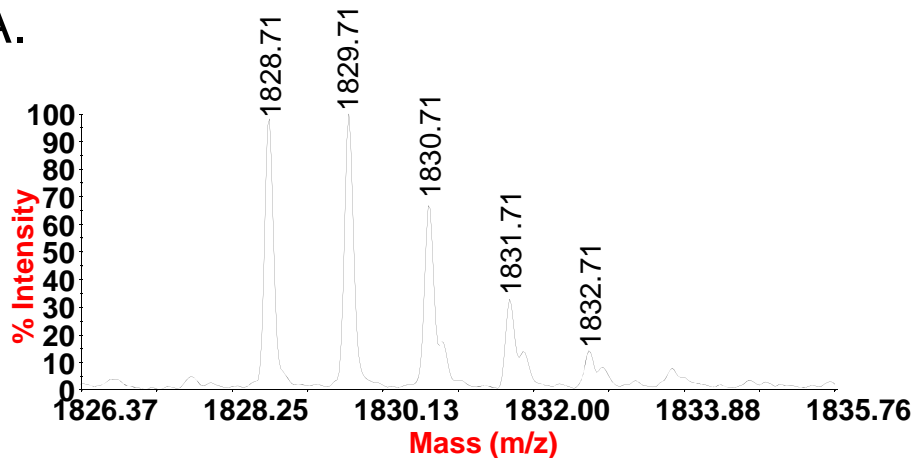

B.

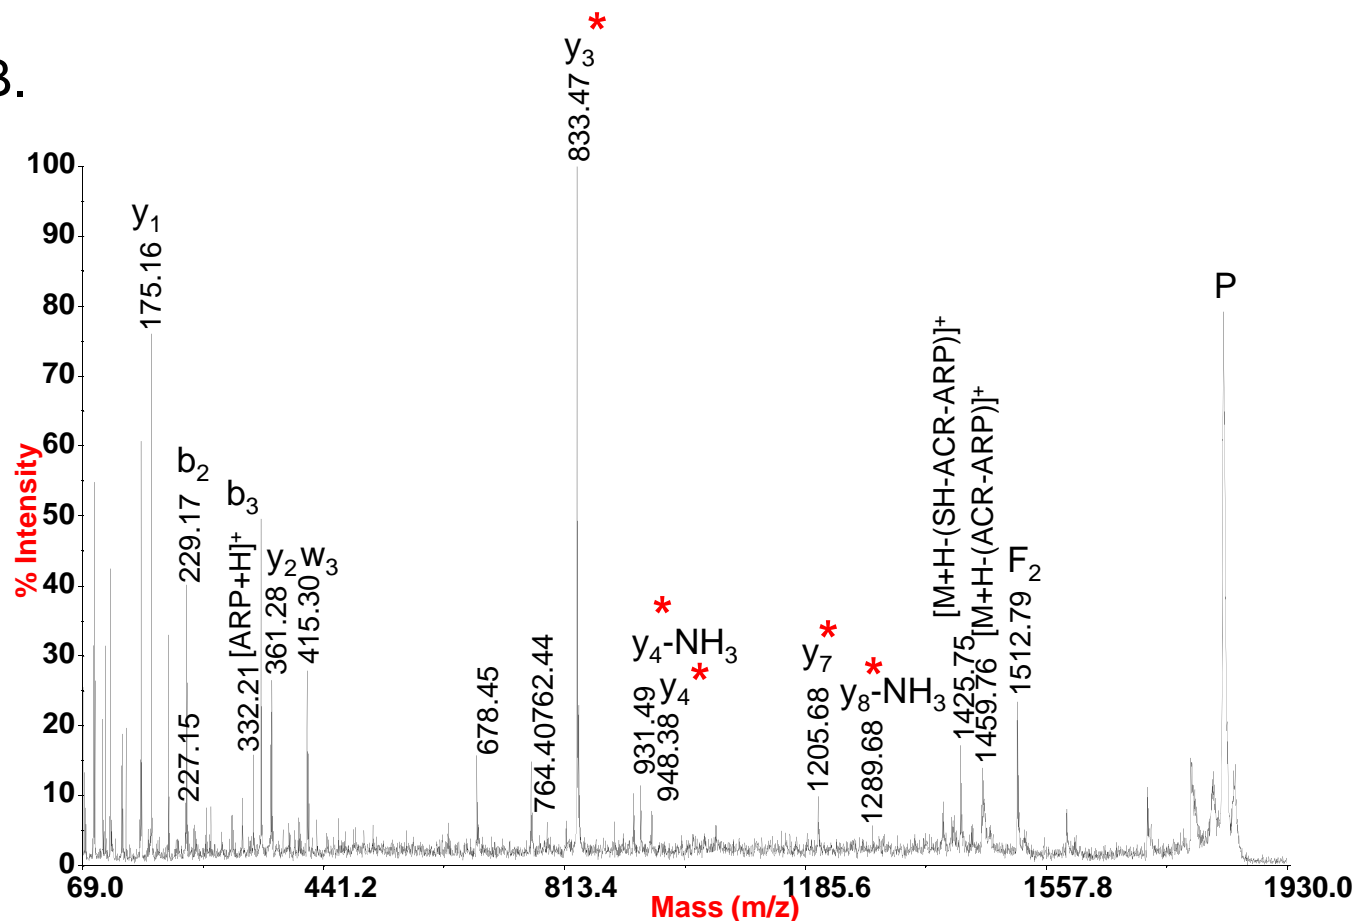

**Figure S40.** (A) Full mass spectrum and (B) MS/MS spectrum acquired by MALDI-TOF/TOF of the  $[M+H]^+$  ion of the ARP labeled, acrolein modified peptide DIMYTGTVDC\*WR; monoisotopic  $m/z_{calc}$  1828.78; accuracy  $\Delta(m/z) = -0.07$  Da

# ADT1\_RAT: ADP/ATP translocase 1

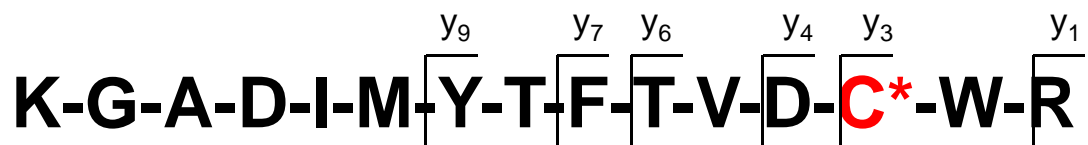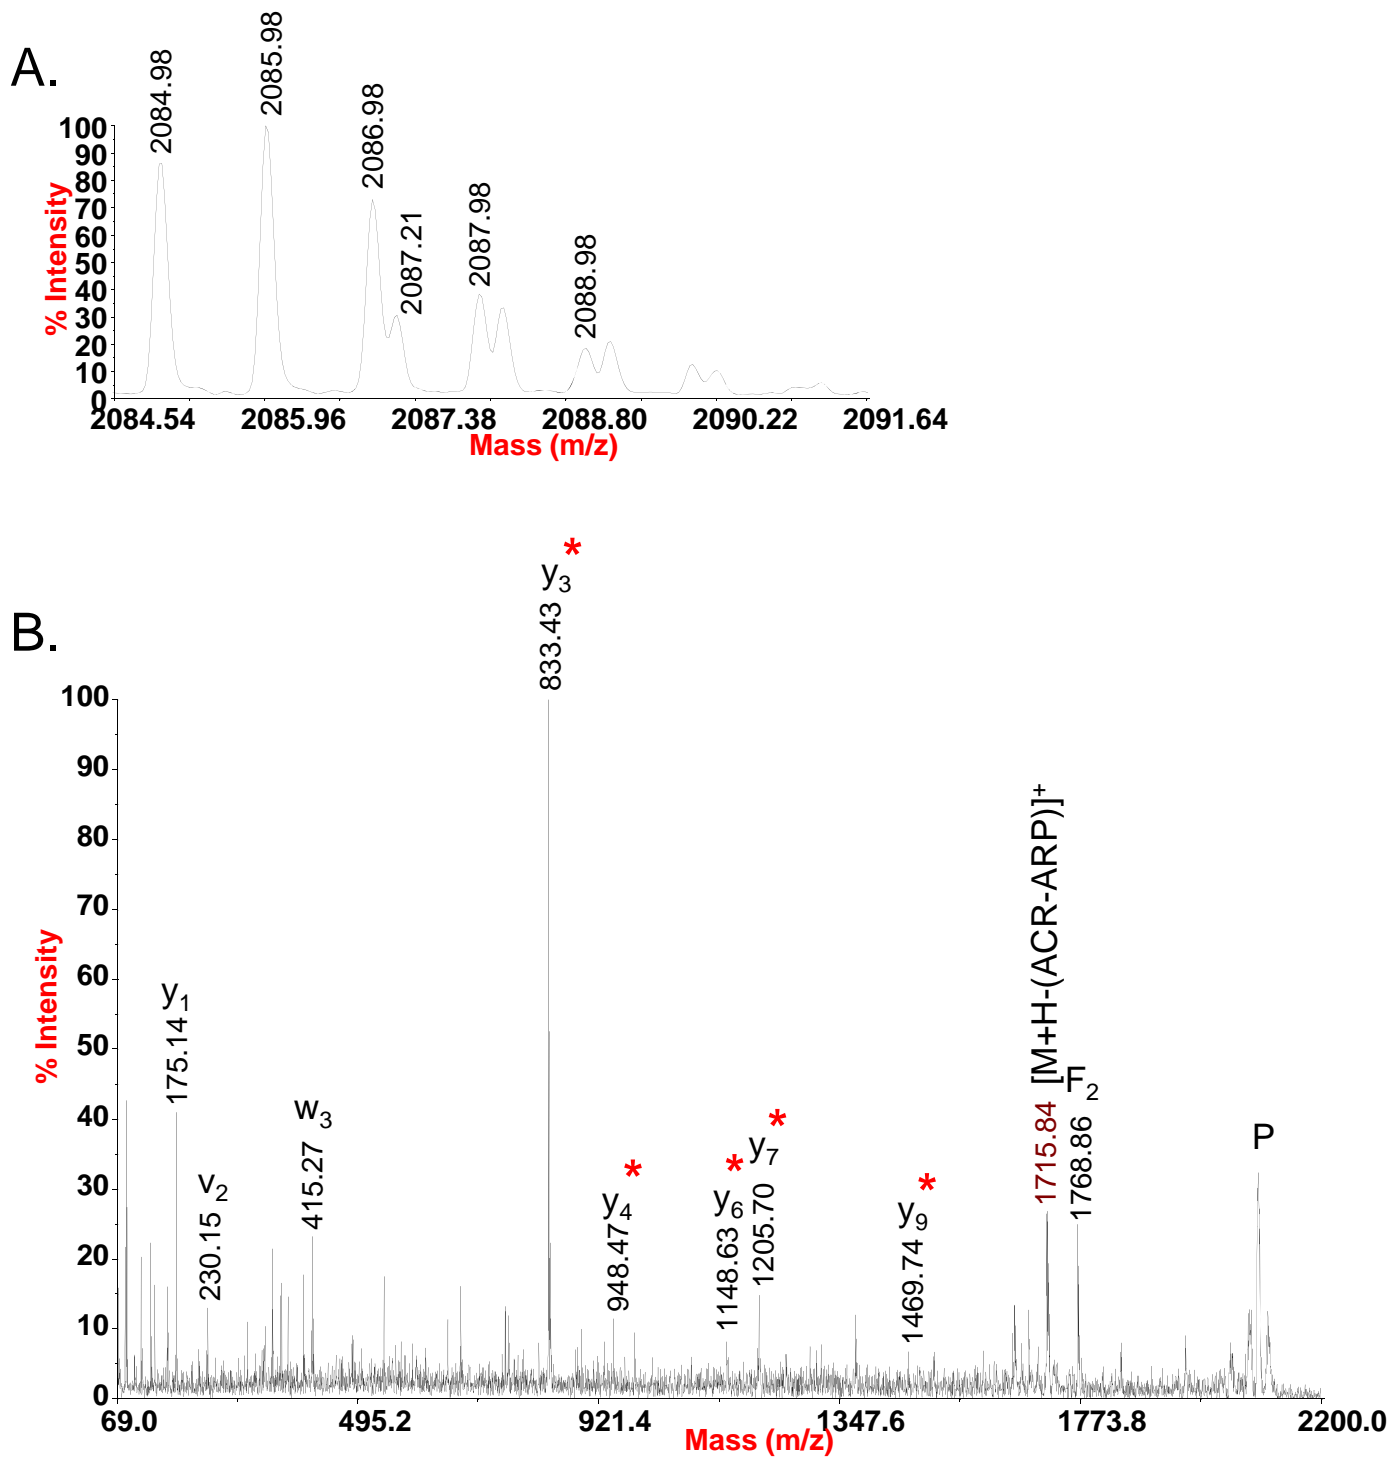

**Figure S41.** (A) Full mass spectrum and (B) MS/MS spectrum acquired by MALDI-TOF/TOF of the  $[M+H]^+$  ion of the ARP labeled, acrolein modified peptide KGADIMYTGTVDC\*WR; monoisotopic  $m/z_{\text{calc}}$  2084.94; accuracy  $\Delta(m/z) = 0.04$  Da

# ADT2\_RAT: ADP/ATP translocase 2

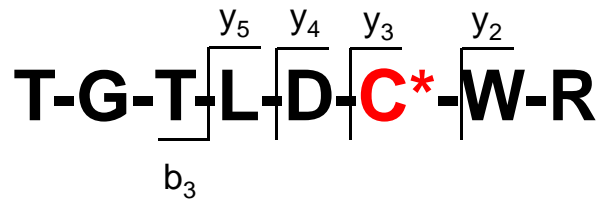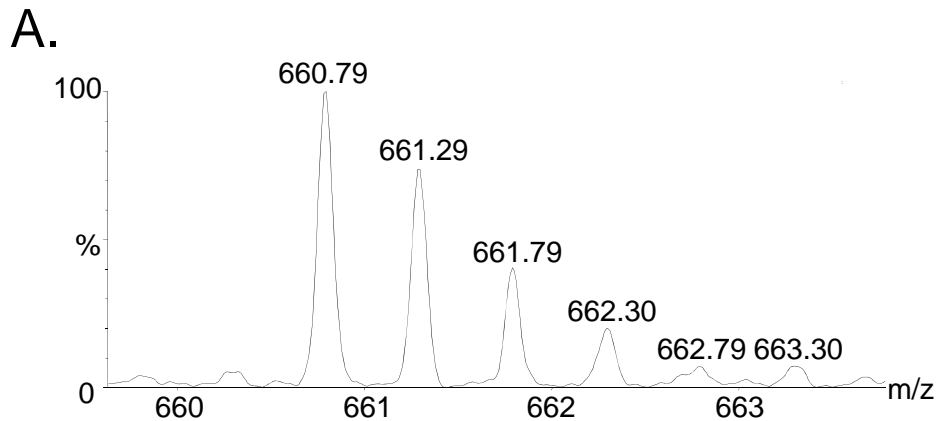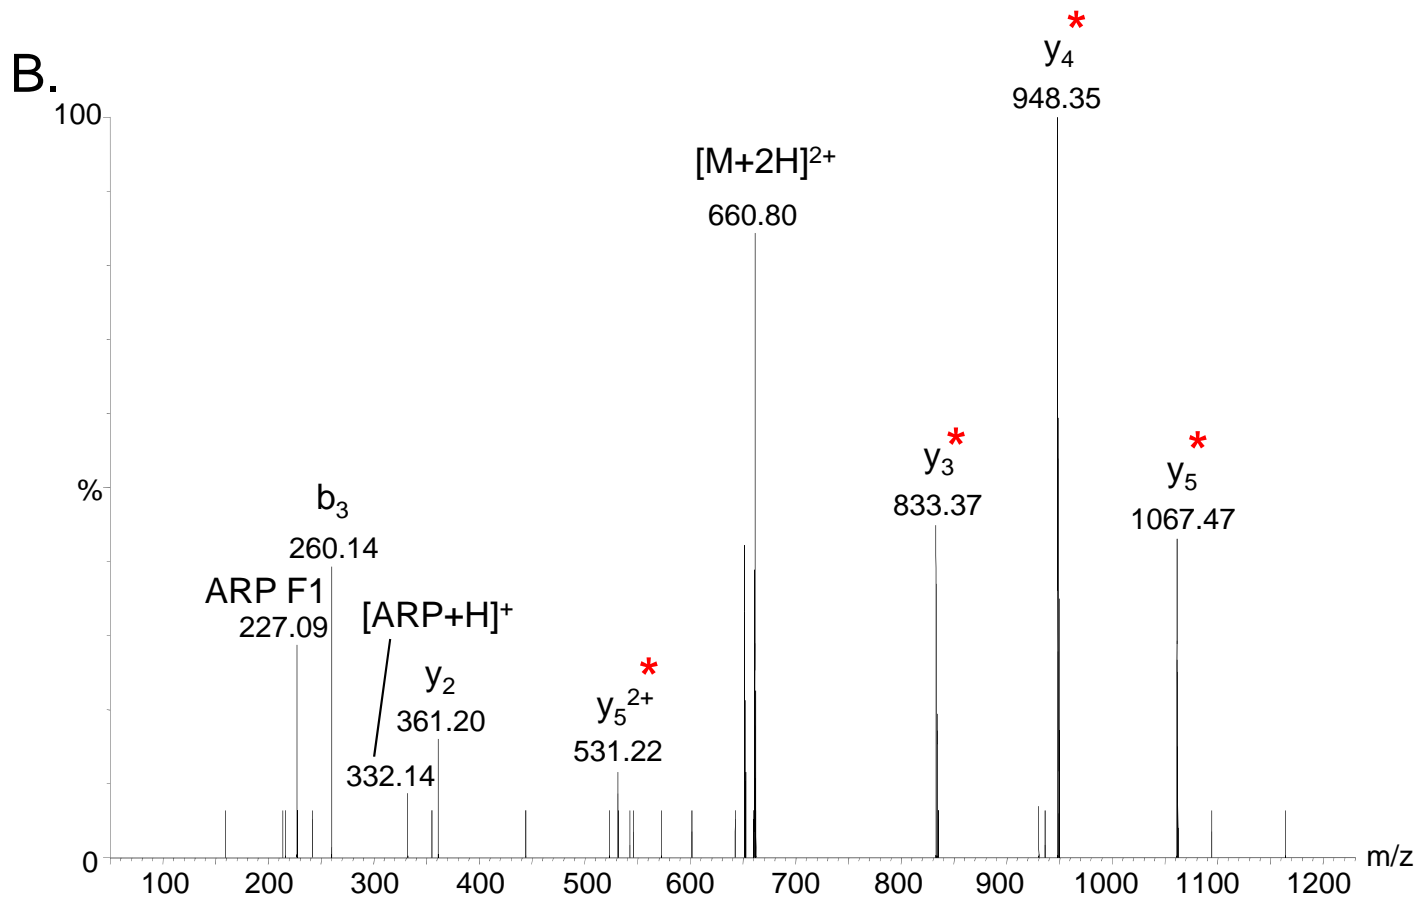

**Figure S42.** (A) Full mass spectrum and (B) MS/MS spectrum acquired by ESI-Q-TOF of the  $[M+2H]^{2+}$  ion of the ARP labeled, acrolein modified peptide TGTLD $C^*$ WR; monoisotopic  $m/z_{calc}$  660.79; accuracy  $\Delta(m/z) = 0.00$  Da

# VDAC1\_RAT: Voltage-dependent anion-selective channel protein 1

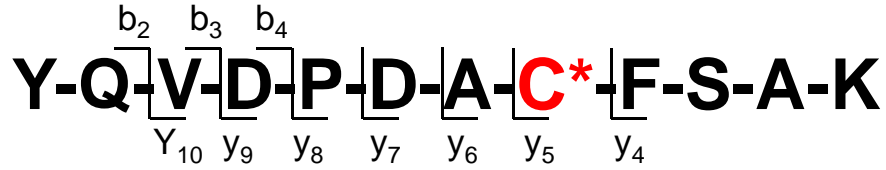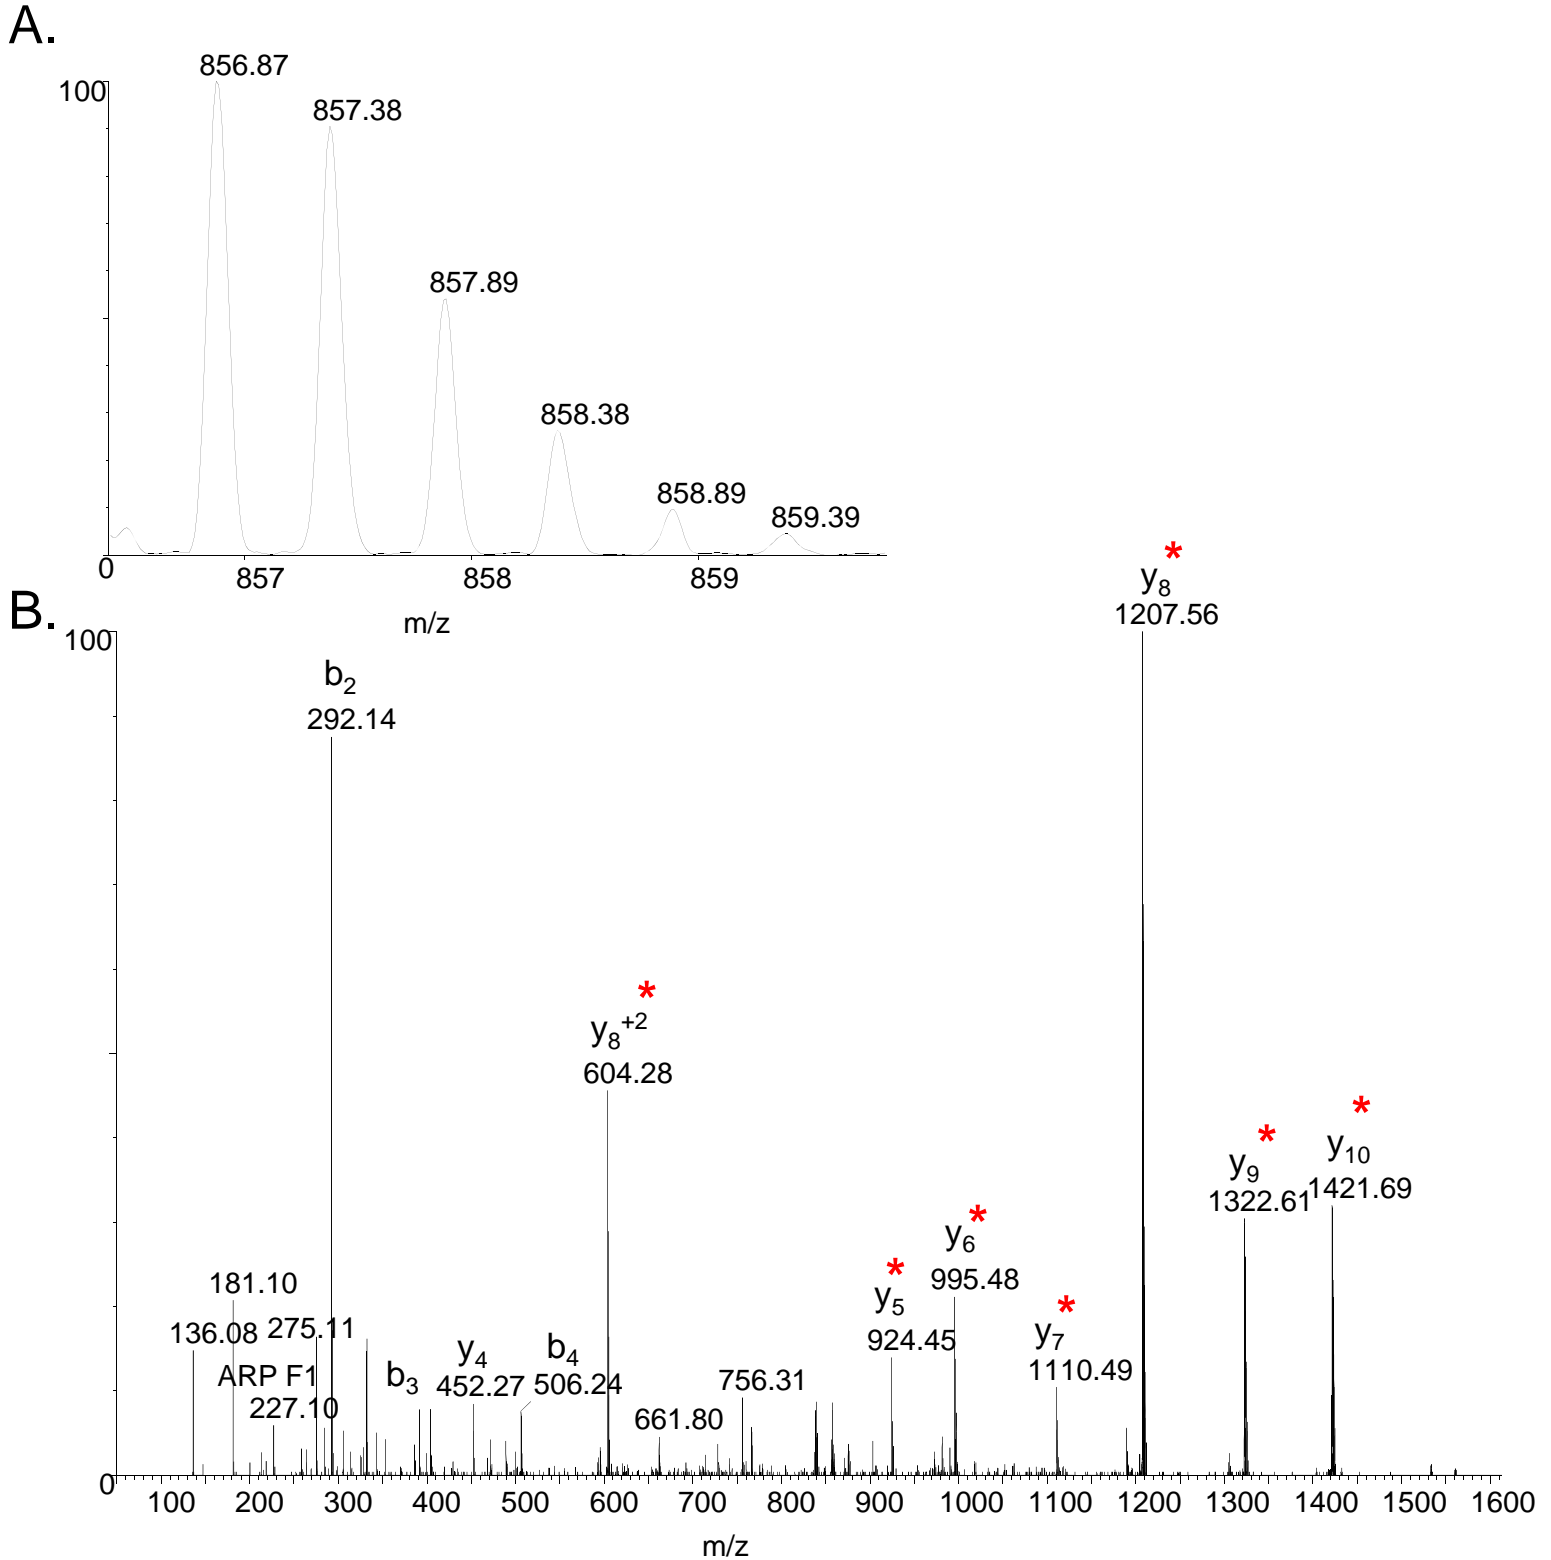

**Figure S43.** (A) Full mass spectrum and (B) MS/MS spectrum acquired by ESI-Q-TOF of the  $[M+2H]^{2+}$  ion of the ARP labeled, acrolein modified peptide YQVDPDAC\*FSAK; monoisotopic  $m/z_{calc}$  856.87; accuracy  $\Delta(m/z) = 0.00$  Da

# VDAC1\_RAT: Voltage-dependent anion-selective channel protein 1

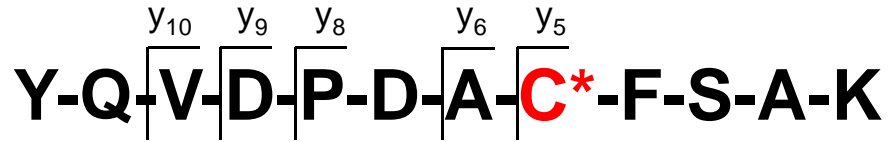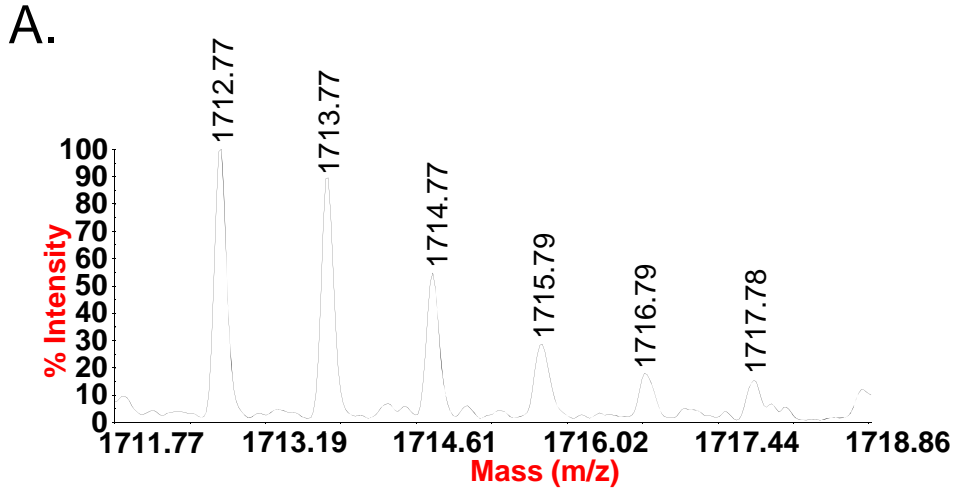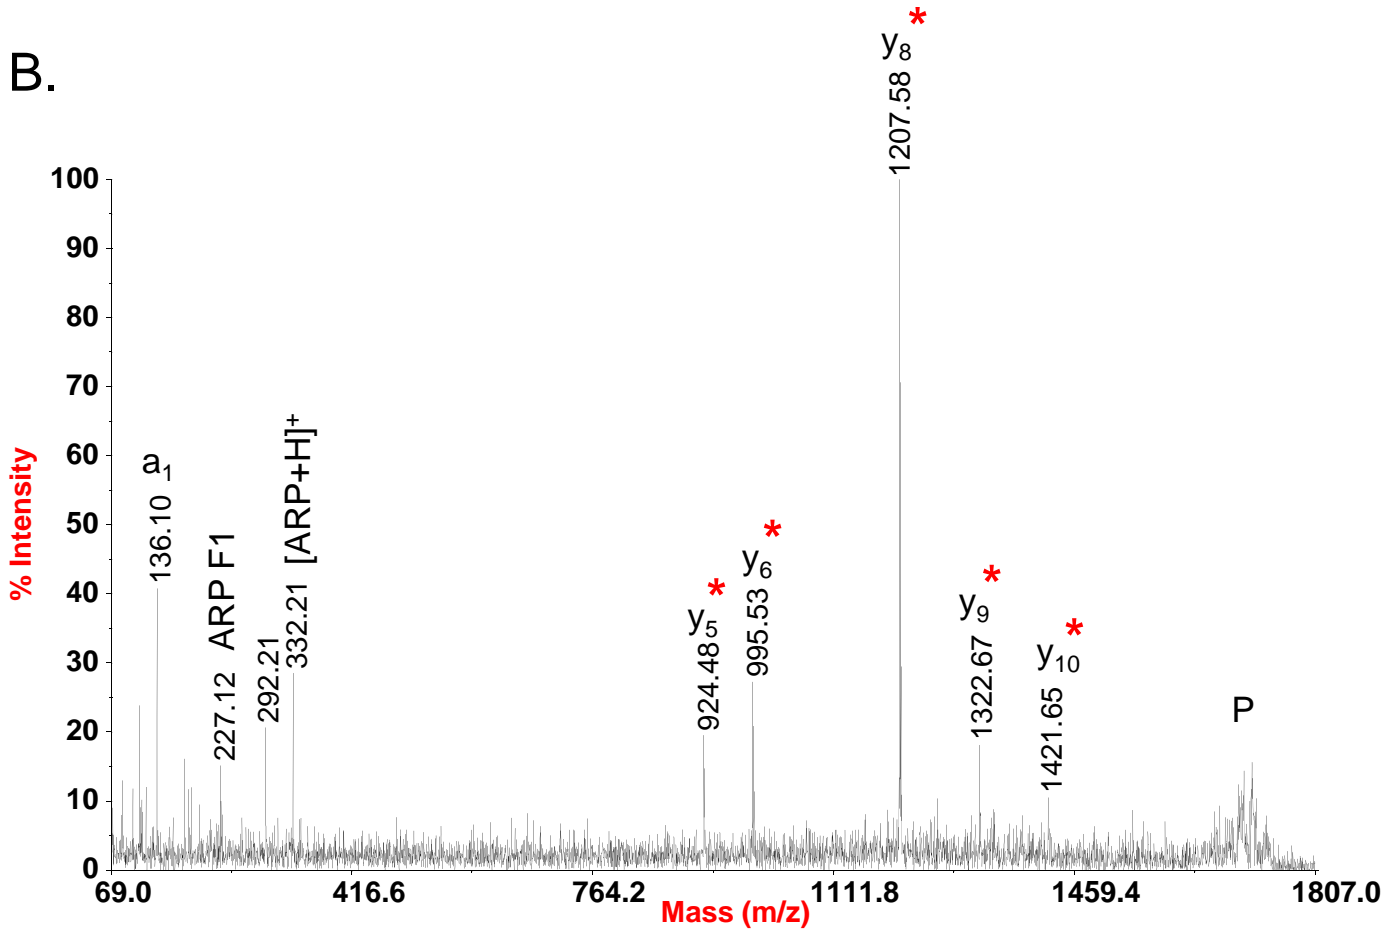

**Figure S44.** (A) Full mass spectrum and (B) MS/MS spectrum acquired by MALDI-TOF/TOF of the [M+H]<sup>+</sup> ion of the ARP labeled, acrolein modified peptide YQVDPDAC\*FSAK; monoisotopic m/z<sub>calc</sub> 1712.74; accuracy Δ(m/z) = 0.03 Da

# VDAC3\_RAT: Voltage-dependent anion-selective channel protein 3

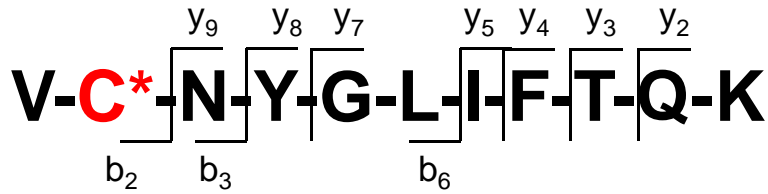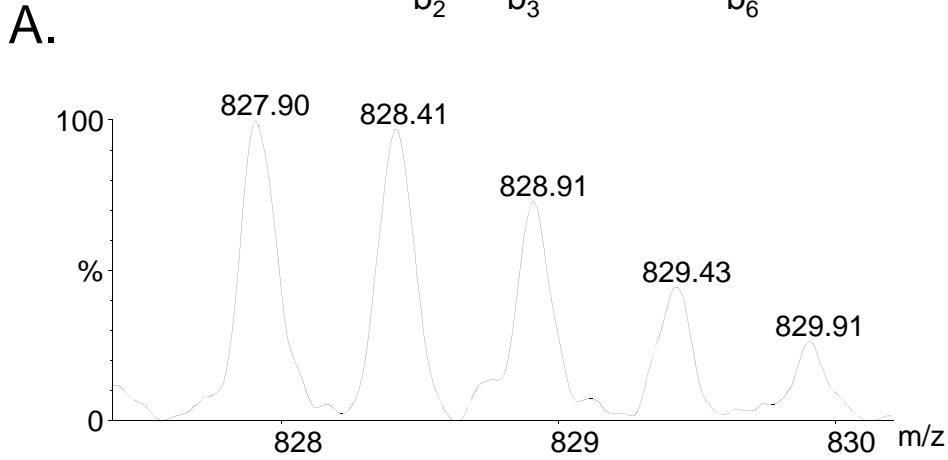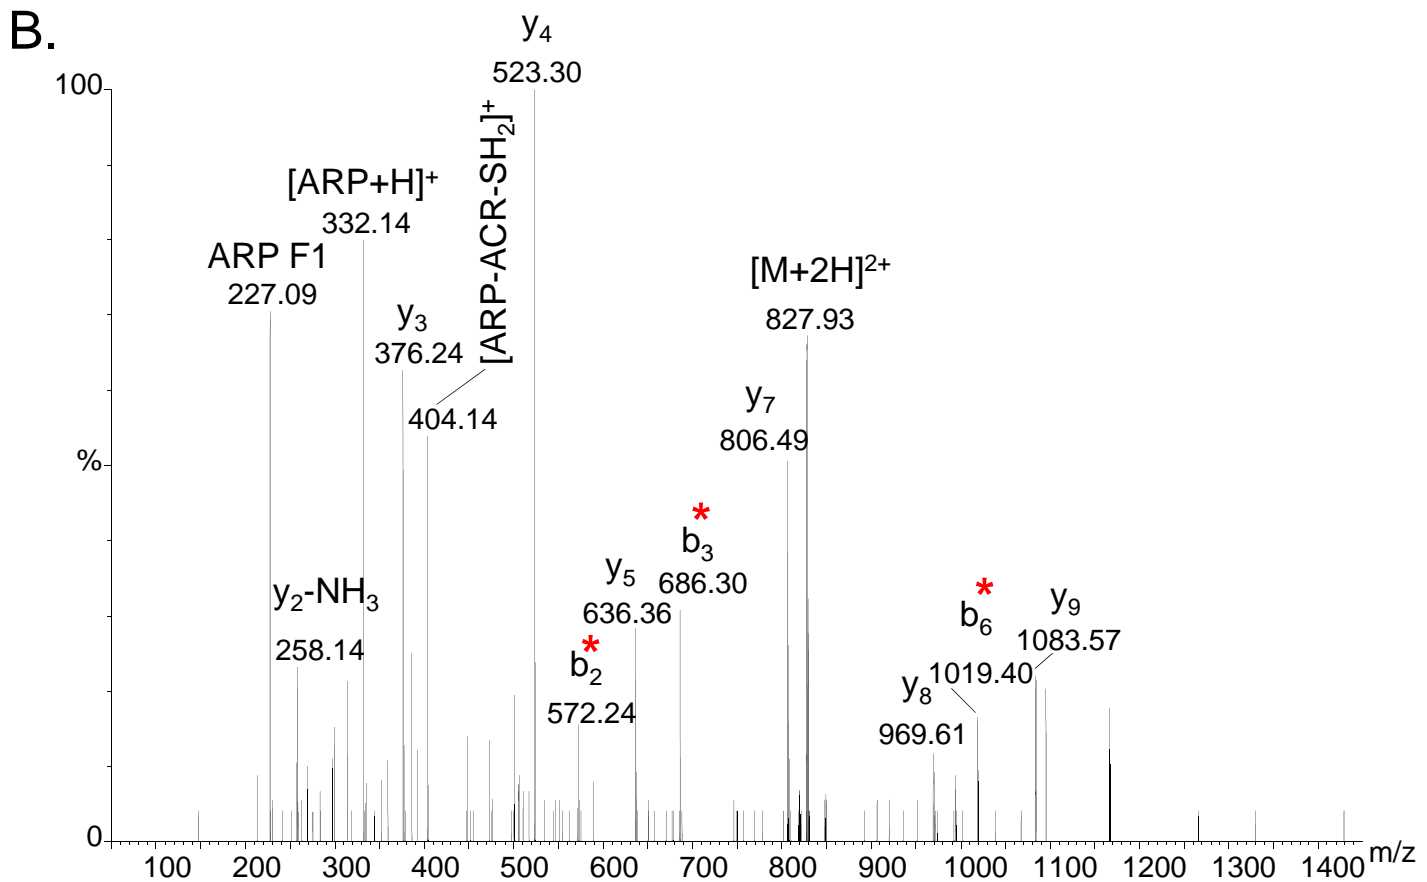

**Figure S45.** (A) Full mass spectrum and (B) MS/MS spectrum acquired by ESI-Q-TOF of the  $[M+2H]^{2+}$  ion of the ARP labeled, acrolein modified peptide VC\*NYGLIFTQK; monoisotopic  $m/z_{\text{calc}}$  827.91; accuracy  $\Delta(m/z) = -0.01$  Da

# ACON\_RAT:Aconitate hydratase

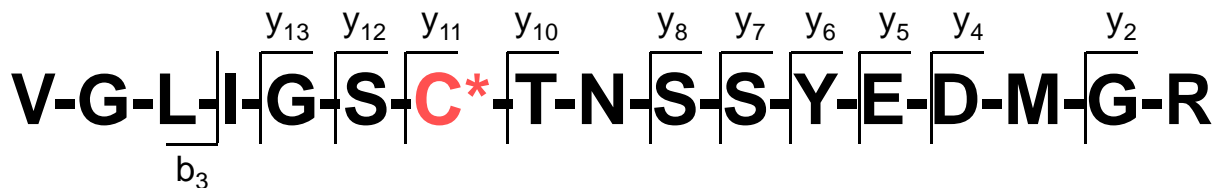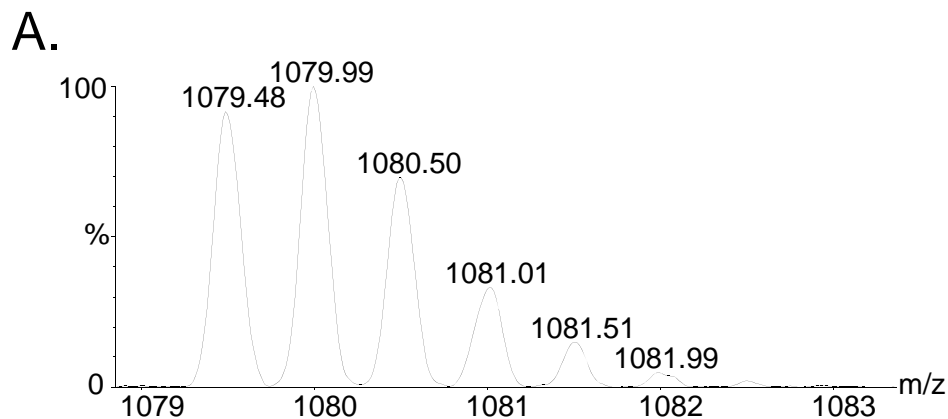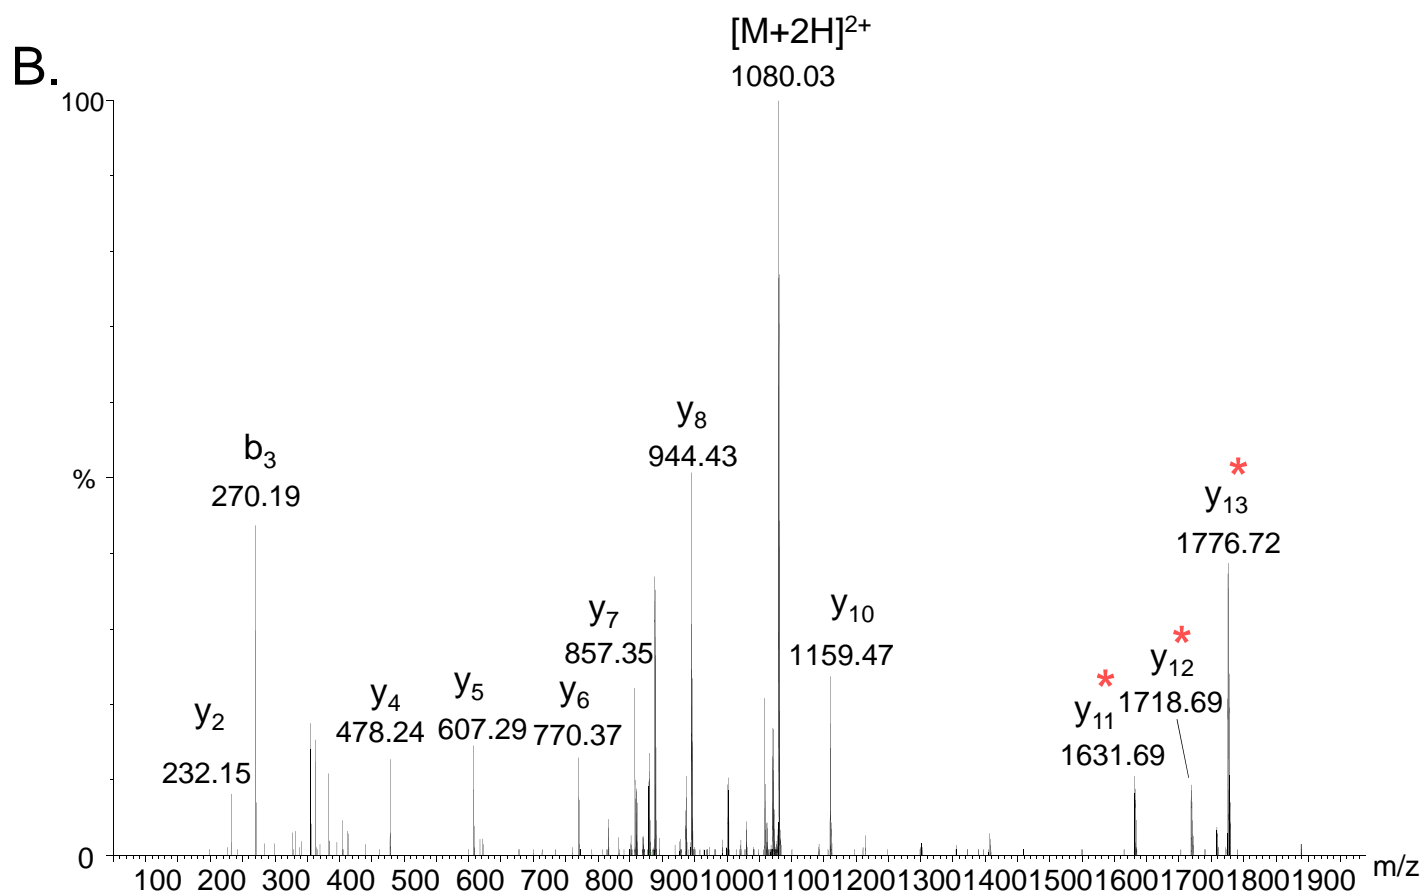

**Figure S46.** (A) Full mass spectrum and (B) MS/MS spectrum acquired by ESI-Q-TOF of the  $[M+2H]^{2+}$  ion of the ARP labeled, acrolein modified peptide VGLIGSC\*TNSSYEDMGR; monoisotopic  $m/z_{calc}$  1079.47; accuracy  $\Delta(m/z) = 0.01$  Da

# ACON\_RAT:Aconitate hydratase

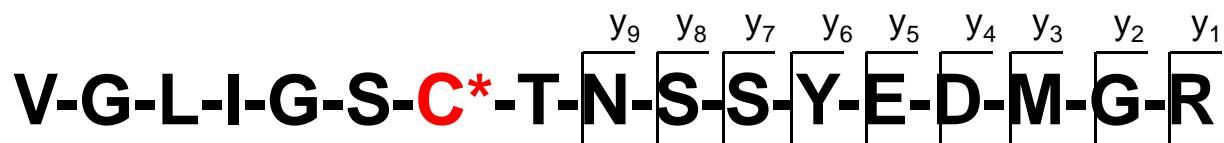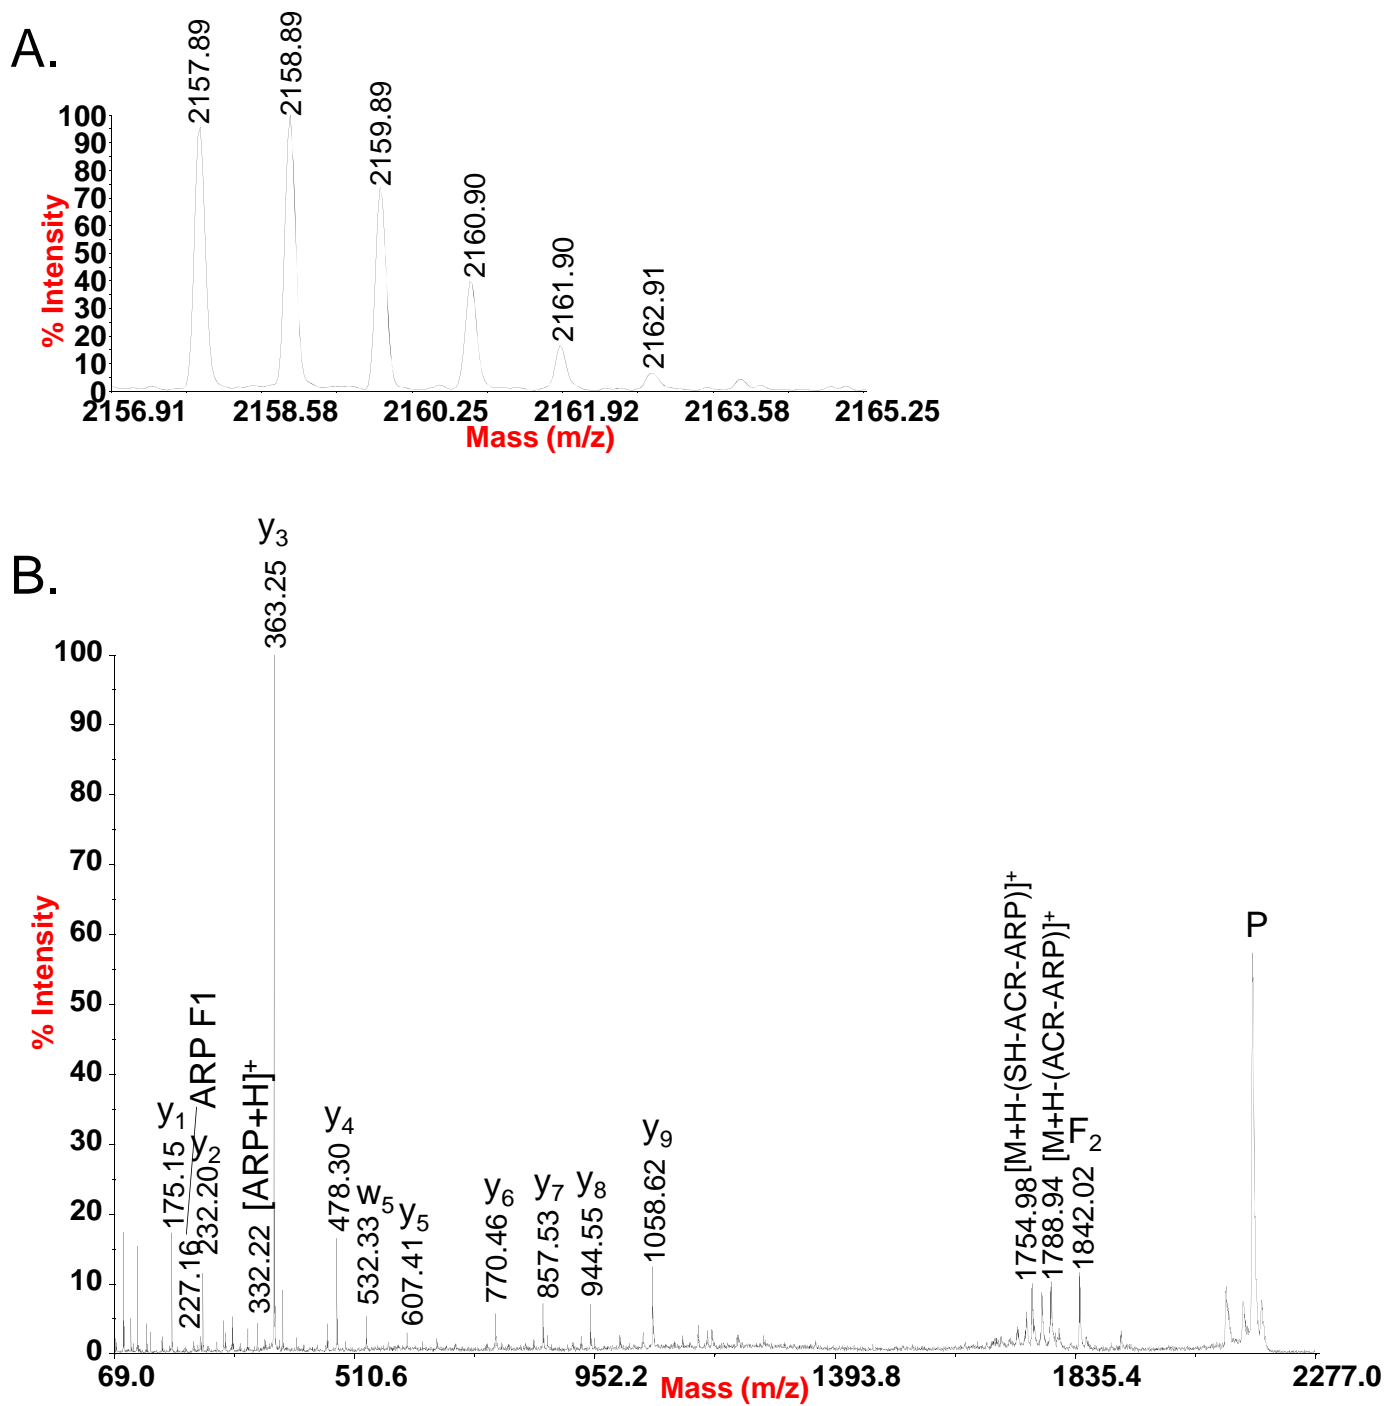

**Figure S47.** (A) Full mass spectrum and (B) MS/MS spectrum acquired by MALDI-TOF/TOF of the  $[M+H]^+$  ion of the ARP labeled, acrolein modified peptide VGLIGSC\*TNSSYEDMGR; monoisotopic  $m/z_{\text{calc}}$  2157.94; accuracy  $\Delta(m/z) = -0.05$  Da



# ACON\_RAT:Aconitate hydratase

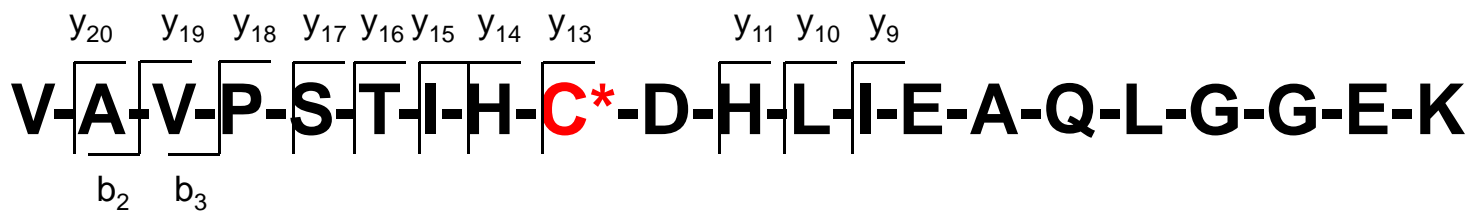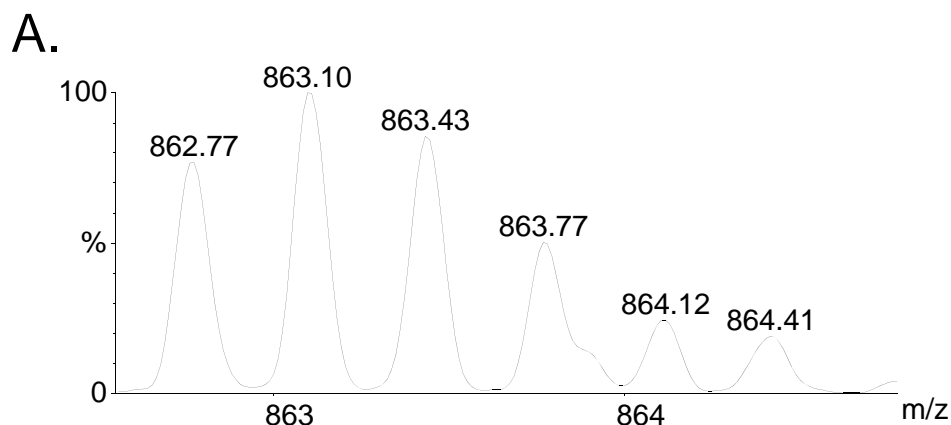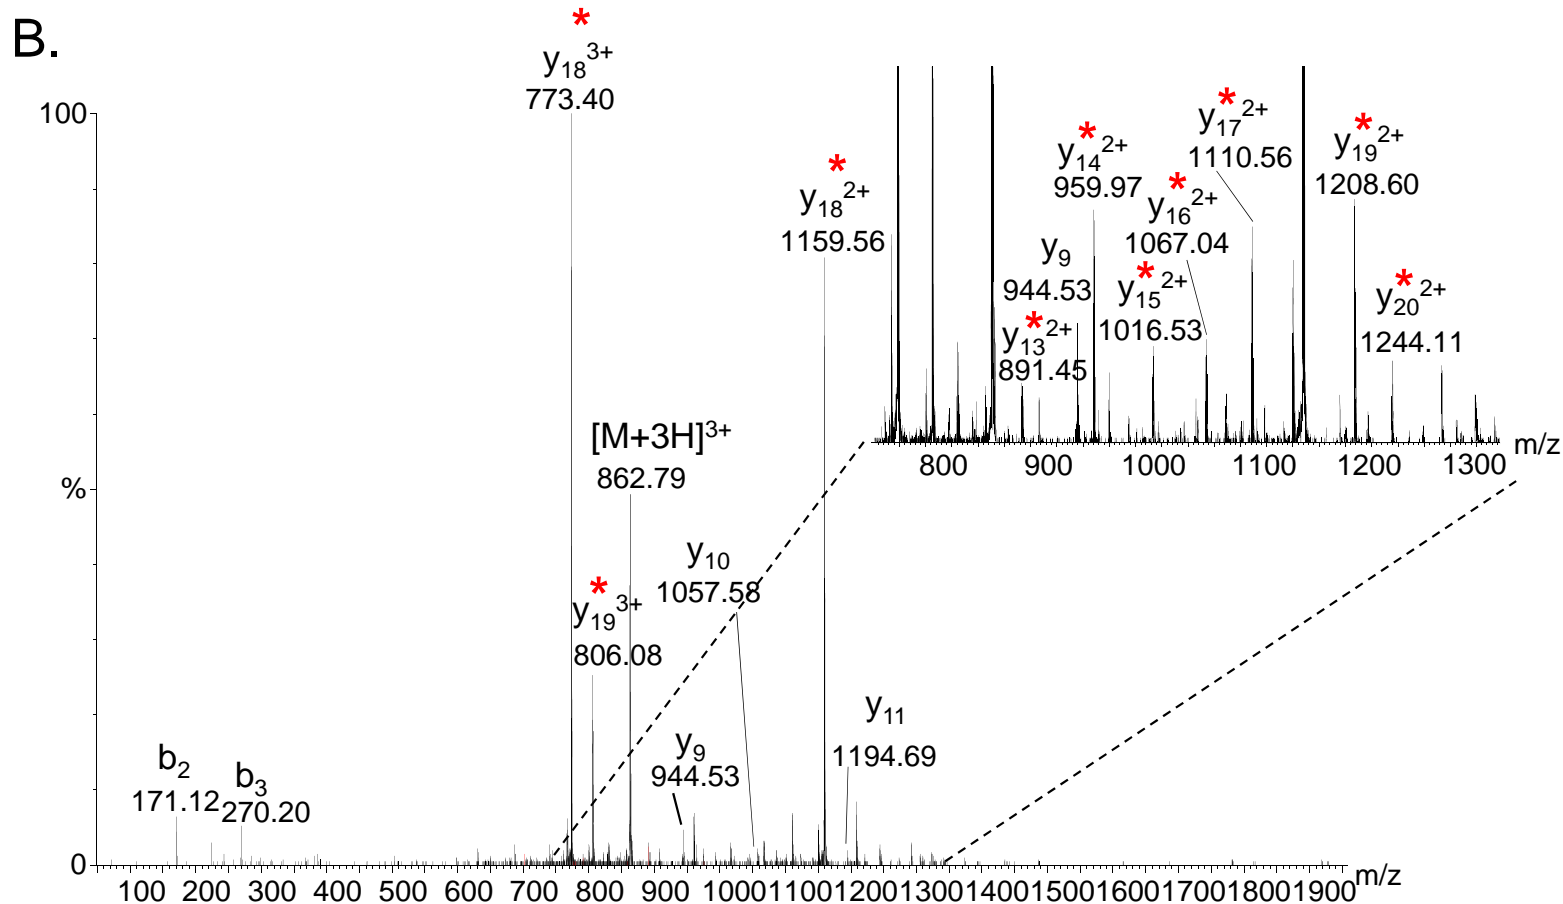

**Figure S48.** (A) Full mass spectrum and (B) MS/MS spectrum acquired by ESI-Q-TOF of the  $[M+3H]^{3+}$  ion of the ARP labeled, acrolein modified peptide VAVPSTIHC\*DHLIEAQLGGEK; monoisotopic  $m/z_{calc}$  862.77; accuracy  $\Delta(m/z) = 0.00$  Da

# IDHP\_RAT: Isocitrate dehydrogenase [NADP]

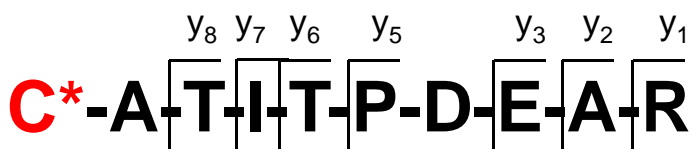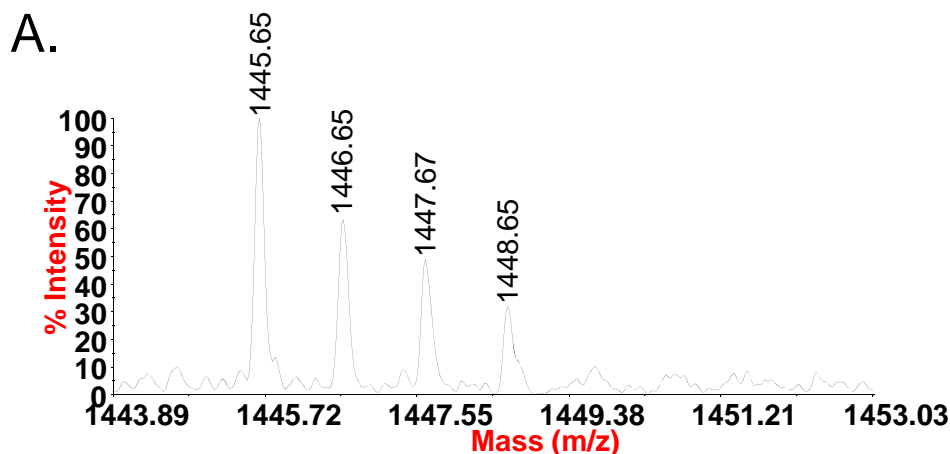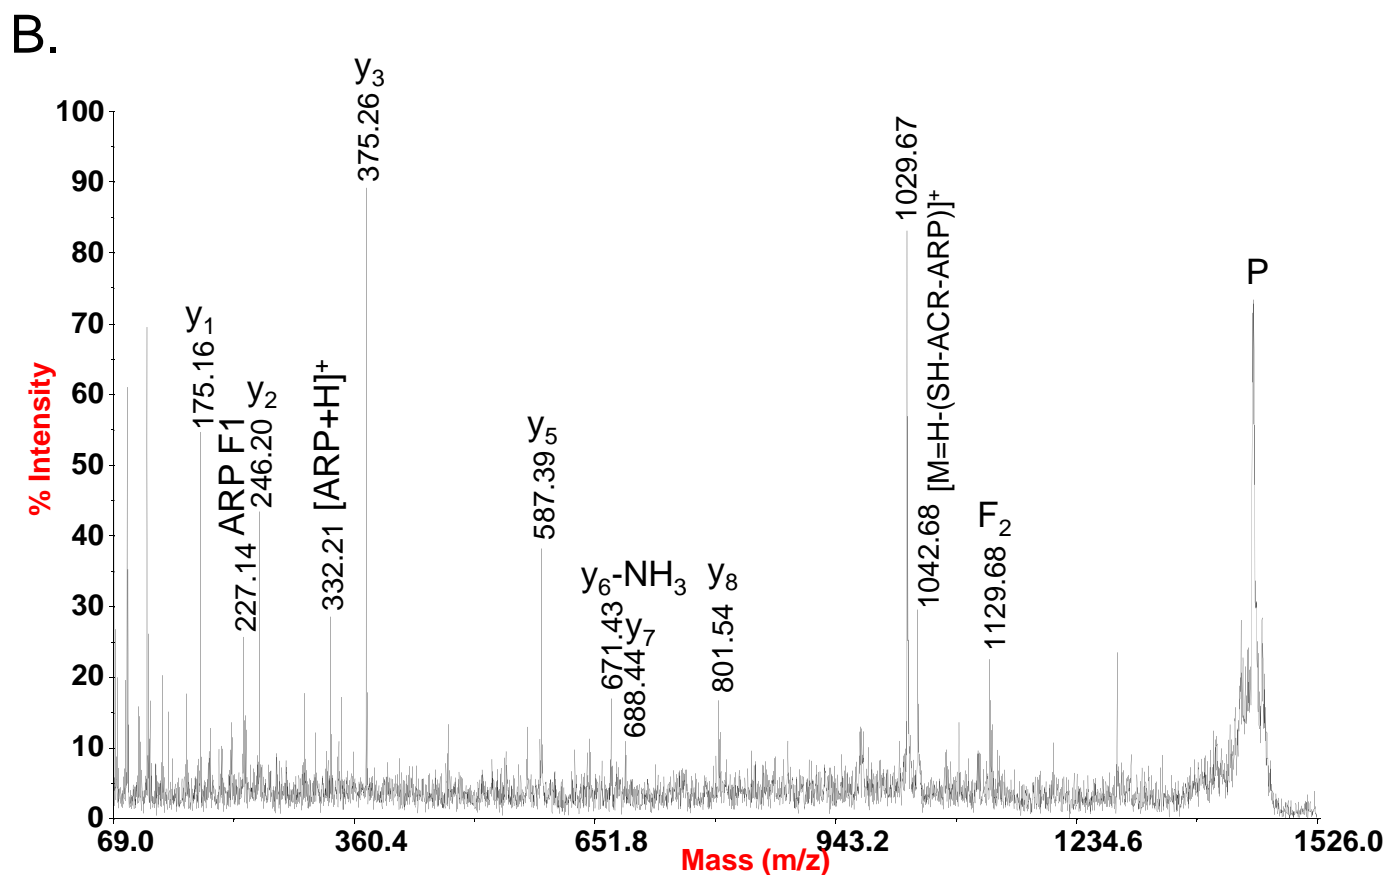

**Figure S49.** (A) Full mass spectrum and (B) MS/MS spectrum acquired by MALDI-TOF/TOF of the [M+H]<sup>+</sup> ion of the ARP labeled, acrolein modified peptide C\*ATITPDEAR; monoisotopic m/z<sub>calc</sub> 1445.65; accuracy Δ(m/z) = 0.00 Da

# IDHP\_RAT: Isocitrate dehydrogenase [NADP]

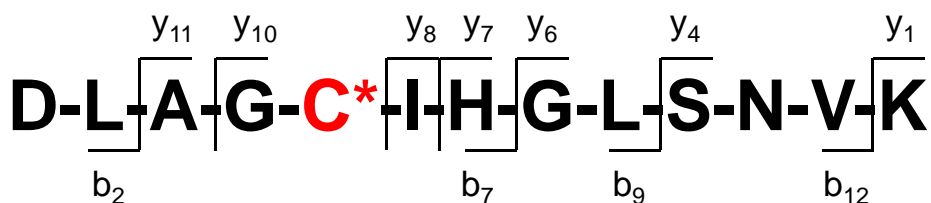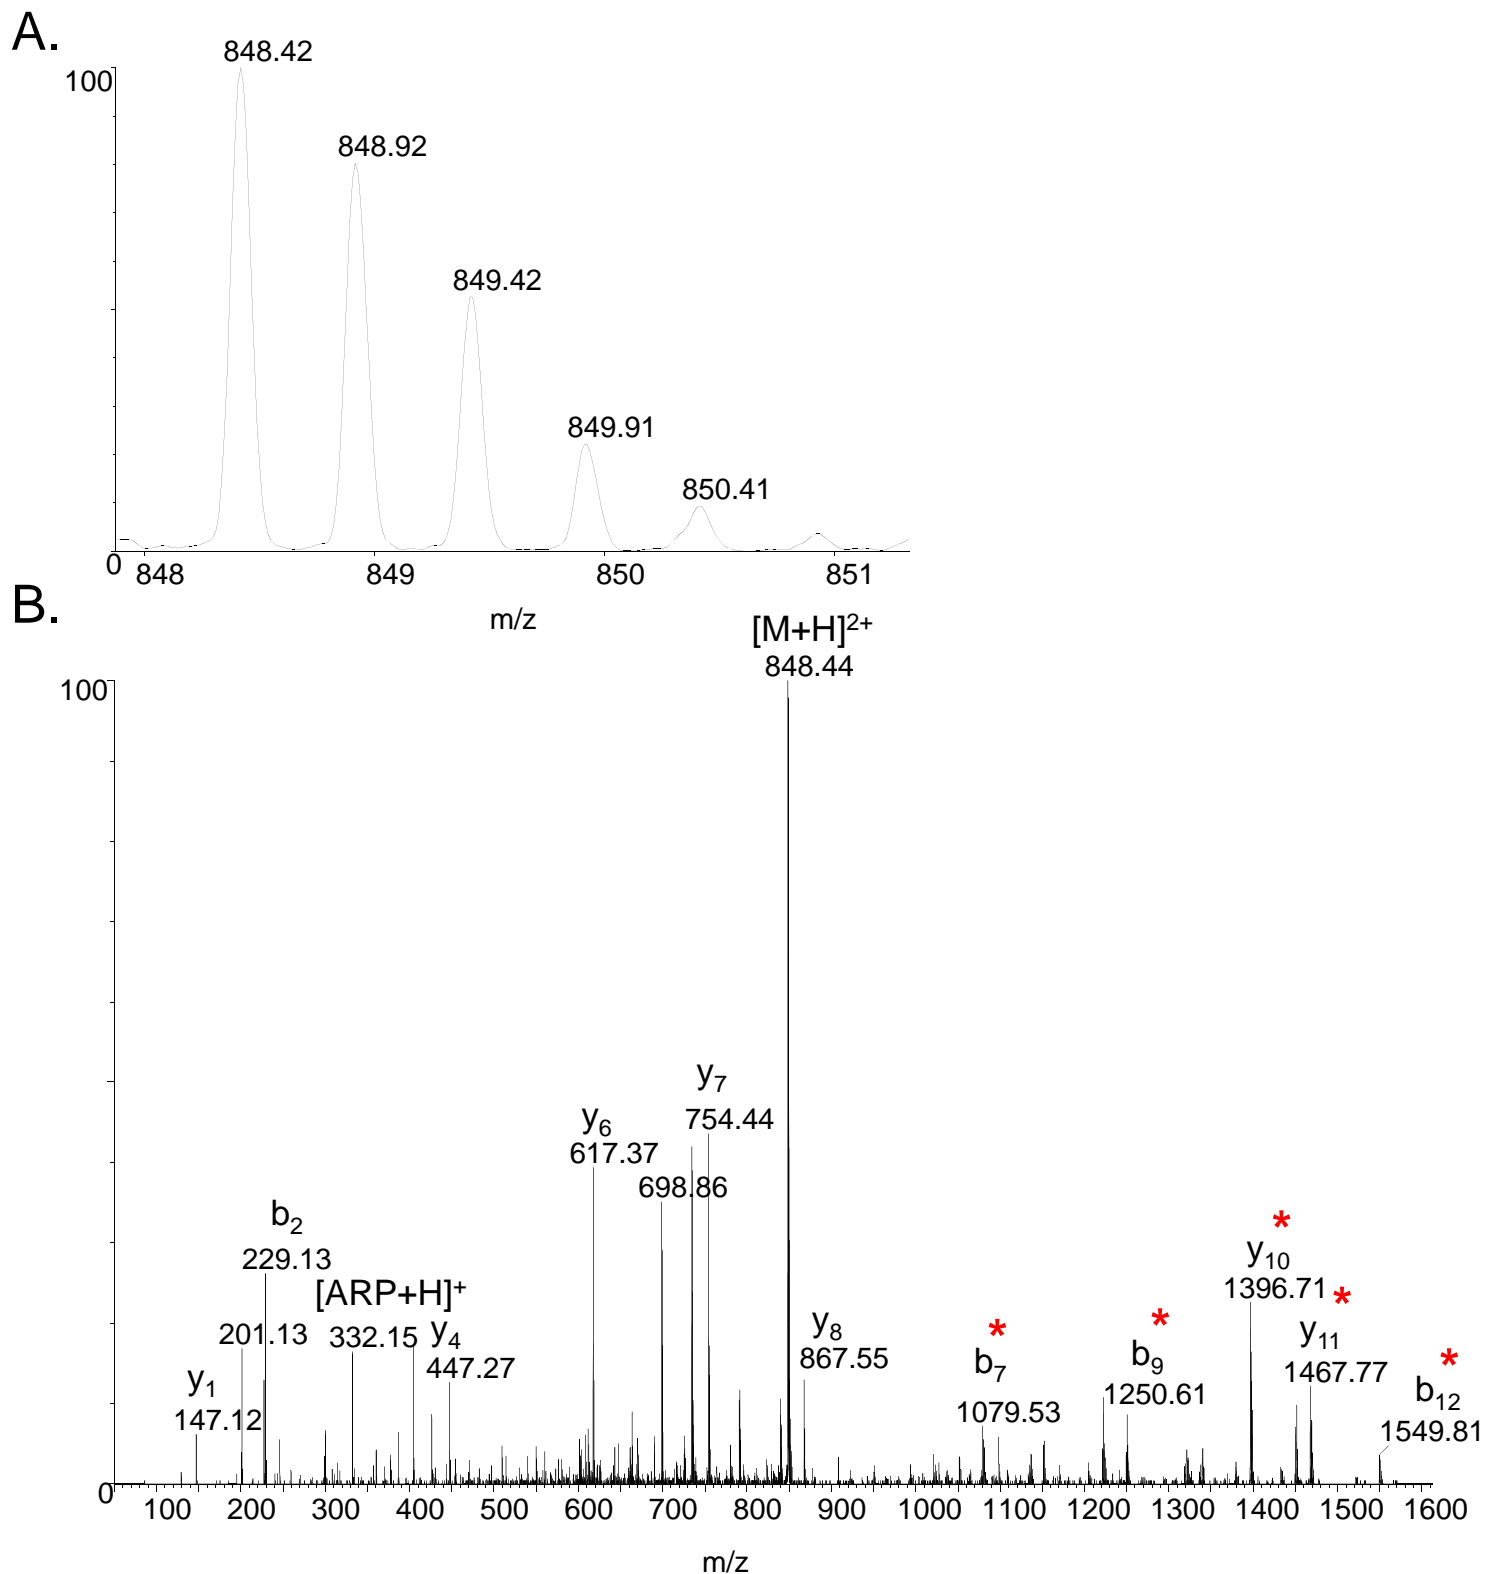

**Figure S50.** (A) Full mass spectrum and (B) MS/MS spectrum acquired by ESI-Q-TOF of the  $[M+2H]^{2+}$  ion of the ARP labeled, acrolein modified peptide DLAGC\*IHGLSNVK; monoisotopic  $m/z_{calc}$  848.42; accuracy  $\Delta(m/z) = 0.00$  Da

# MDHM\_RAT: Malate dehydrogenase

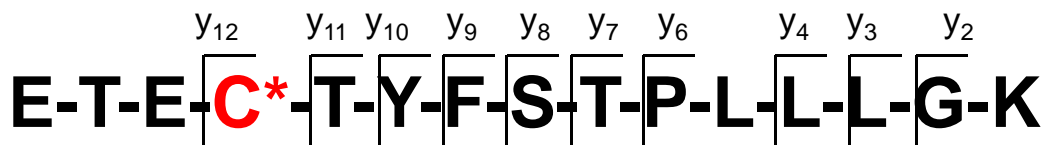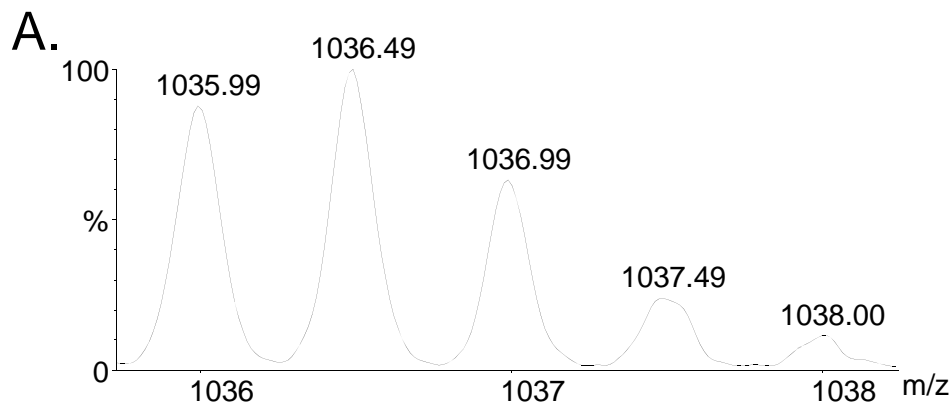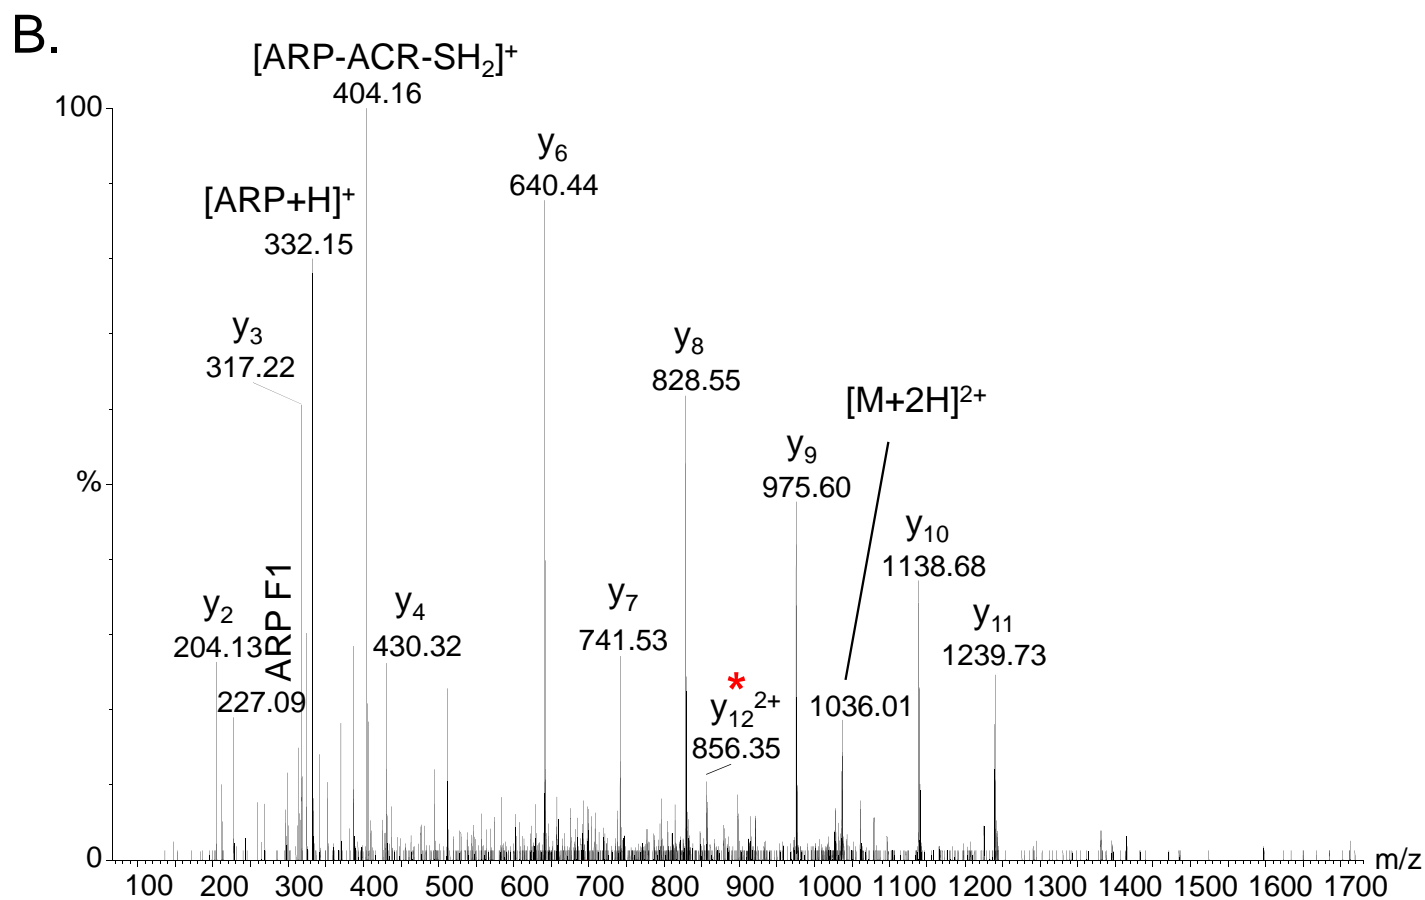

**Figure S51.** (A) Full mass spectrum and (B) MS/MS spectrum acquired by ESI-Q-TOF of the [M+2H]<sup>2+</sup> ion of the ARP labeled, acrolein modified peptide ETEC\*TYFSTPLLLGK; monoisotopic m/z<sub>calc</sub> 1036.00; accuracy Δ(m/z) = -0.01 Da

# MDHM\_RAT: Malate dehydrogenase

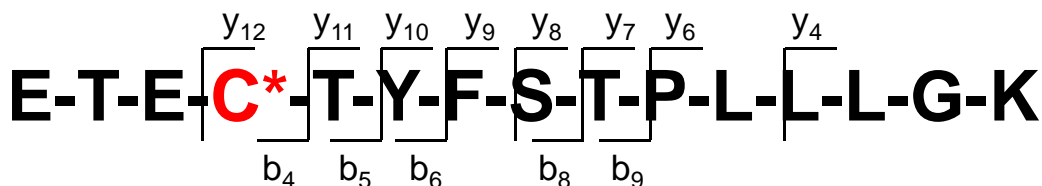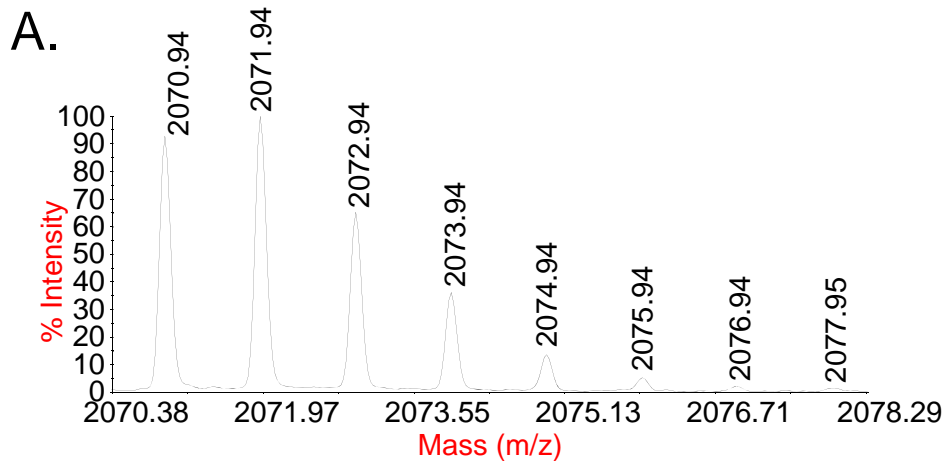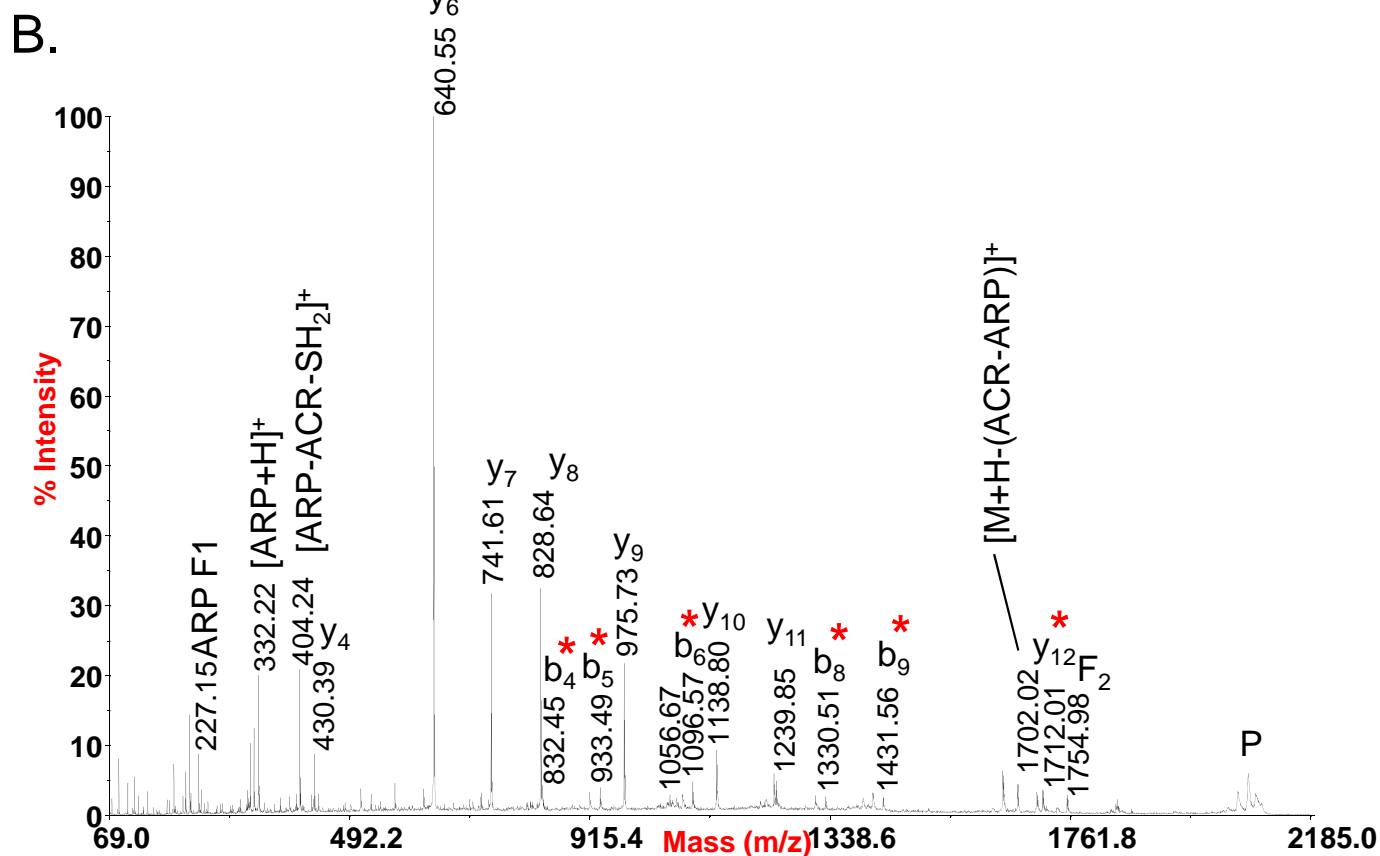

**Figure S52.** (A) Full mass spectrum and (B) MS/MS spectrum acquired by MALDI-TOF/TOF of the [M+H]<sup>+</sup> ion of the ARP labeled, acrolein modified peptide ETEC\*TYFSTPLLLGK; monoisotopic m/z<sub>calc</sub> 2070.99; accuracy Δ(m/z) = -0.05 Da

# MDHM\_RAT: Malate dehydrogenase

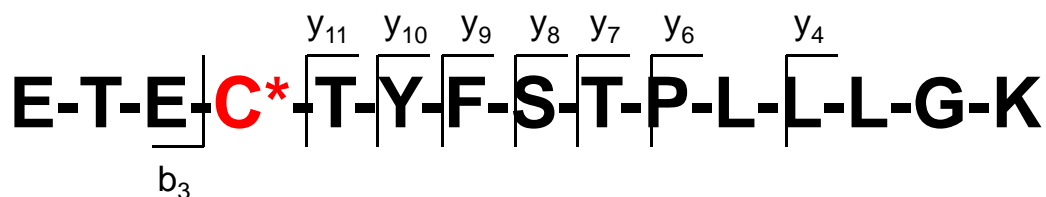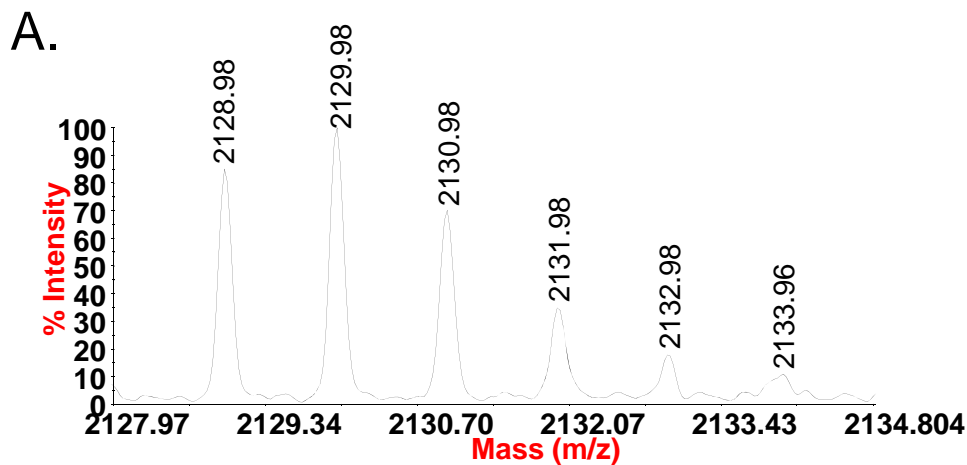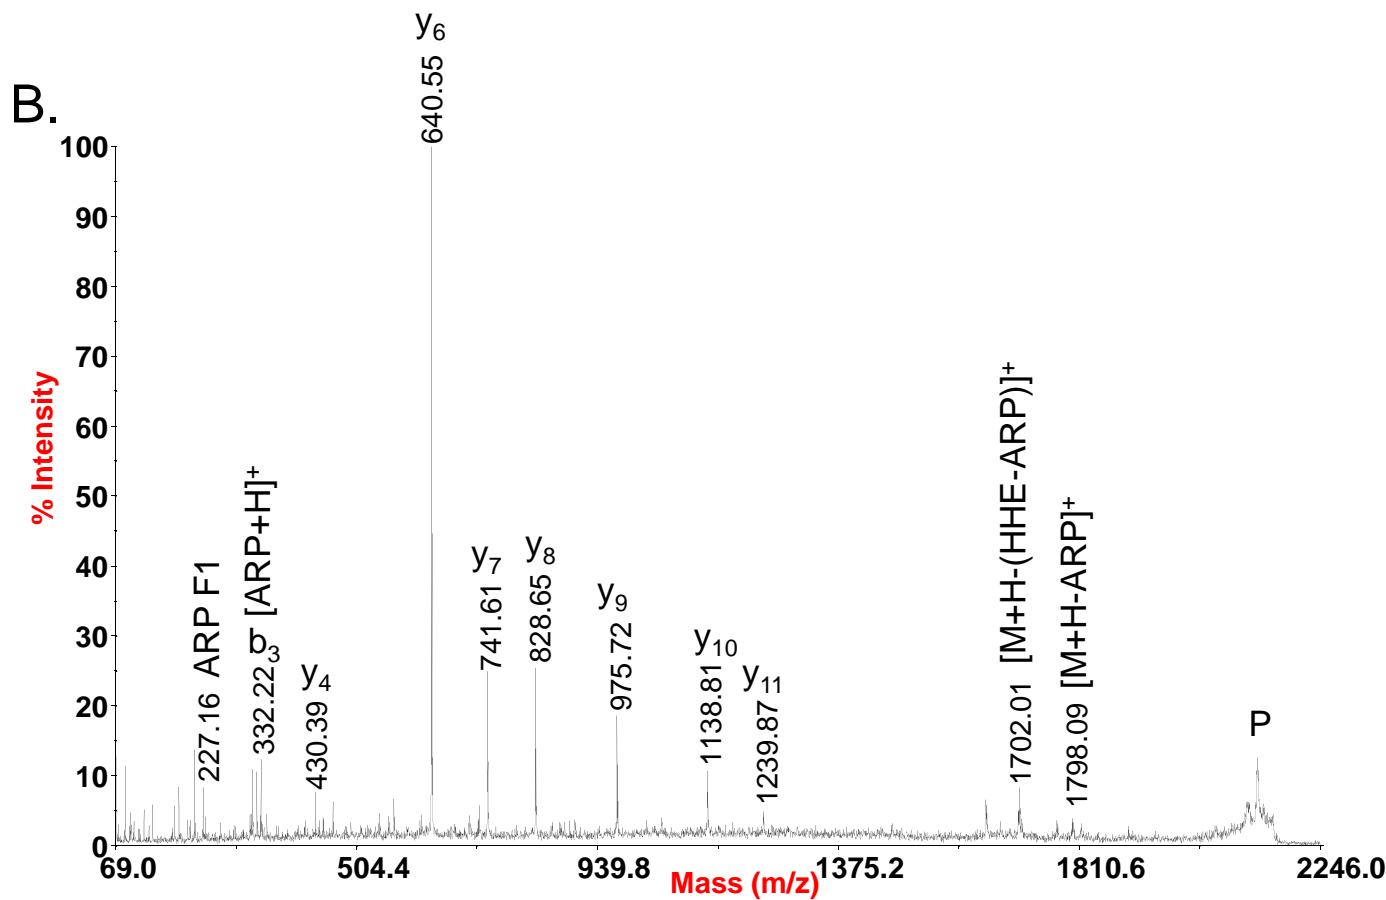

**Figure S53.** (A) Full mass spectrum and (B) MS/MS spectrum acquired by MALDI-TOF/TOF of the  $[M+H]^+$  ion of the ARP labeled, HHE modified peptide ETEC\*TYFSTPLLLGK; monoisotopic  $m/z_{\text{calc}}$  2129.03; accuracy  $\Delta(m/z) = -0.05$  Da

# MDHM\_RAT: Malate dehydrogenase

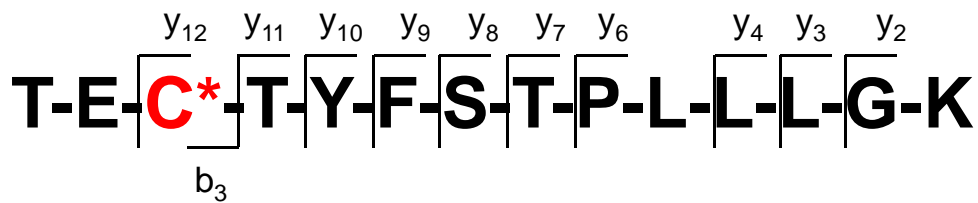

A.

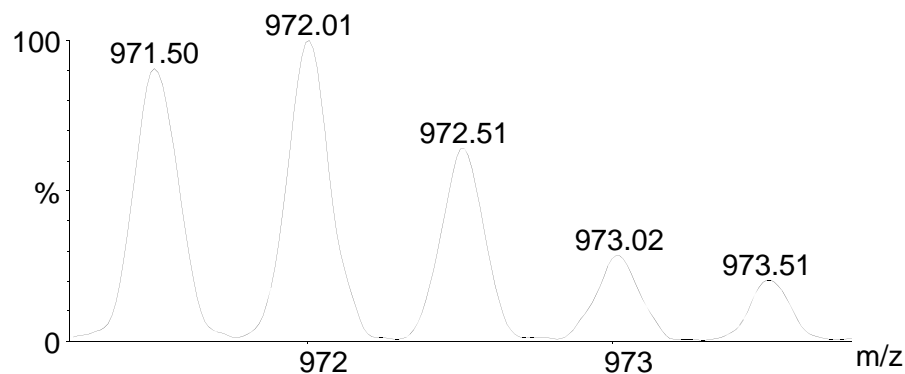

B.

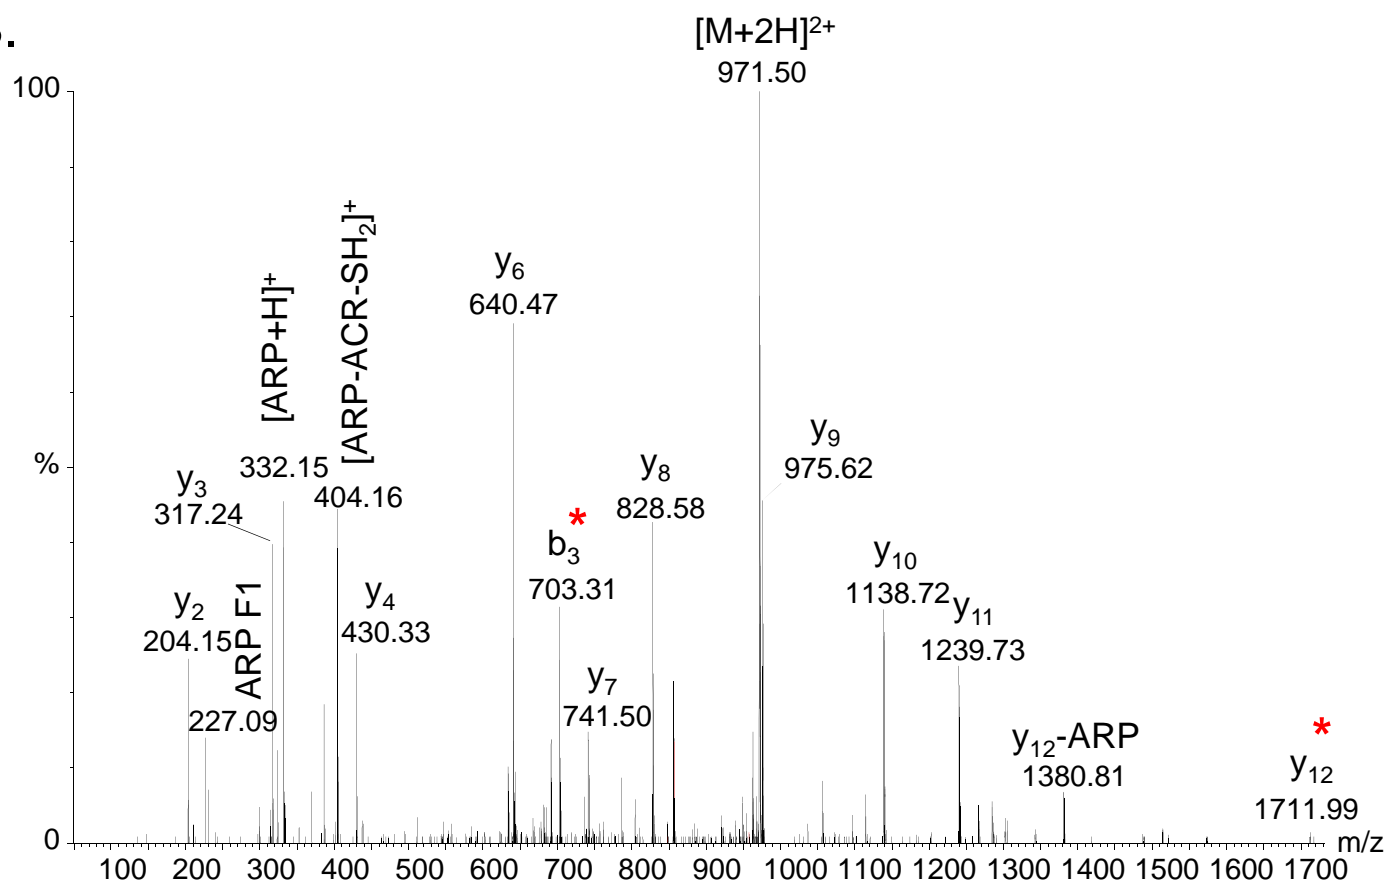

**Figure S54.** (A) Full mass spectrum and (B) MS/MS spectrum acquired by ESI-Q-TOF of the  $[M+2H]^{2+}$  ion of the ARP labeled, acrolein modified peptide TEC\*TYFSTPLLLGK; monoisotopic  $m/z_{calc}$  971.48; accuracy  $\Delta(m/z) = 0.02$  Da

# MDHM\_RAT: Malate dehydrogenase

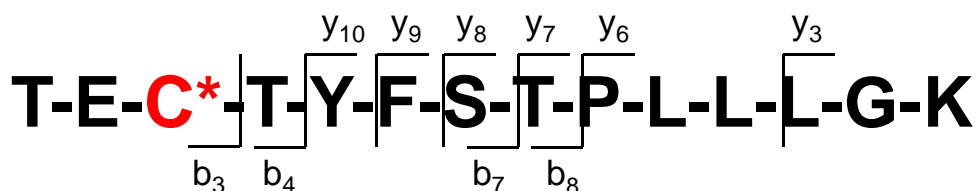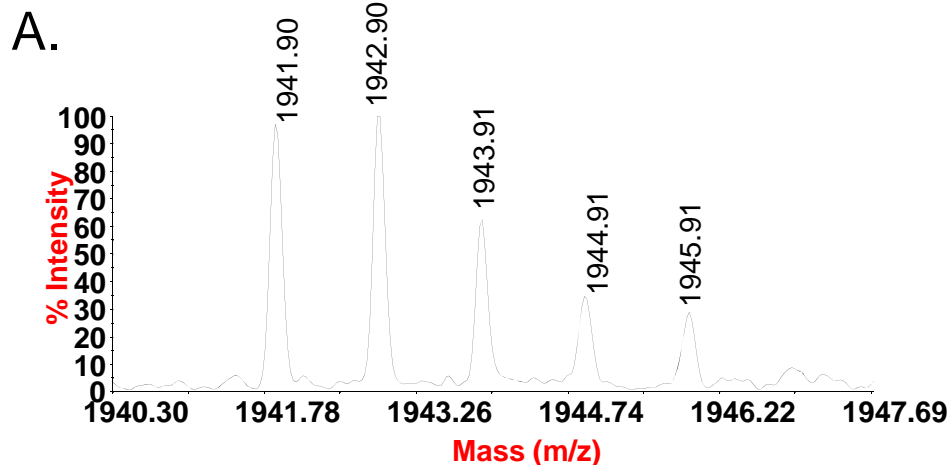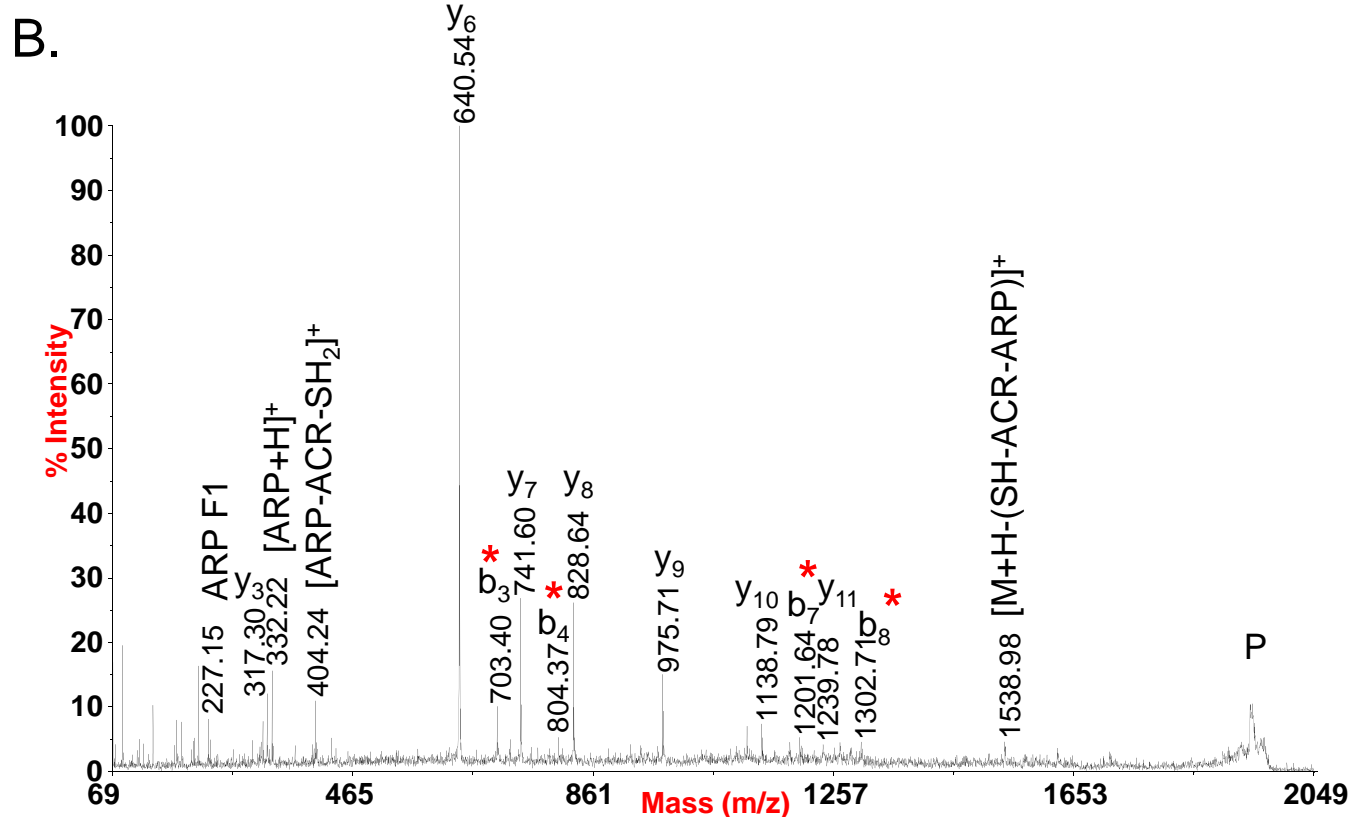

**Figure S55.** (A) Full mass spectrum and (B) MS/MS spectrum acquired by MALDI-TOF/TOF of the  $[M+H]^+$  ion of the ARP labeled, acrolein modified peptide TEC\*TYFSTPLLLGK; monoisotopic  $m/z_{calc}$  1941.94; accuracy  $\Delta(m/z) = -0.04$  Da



# MDHM\_RAT: Malate dehydrogenase

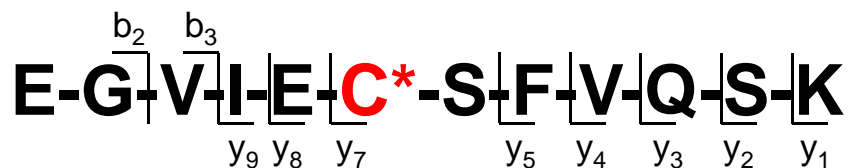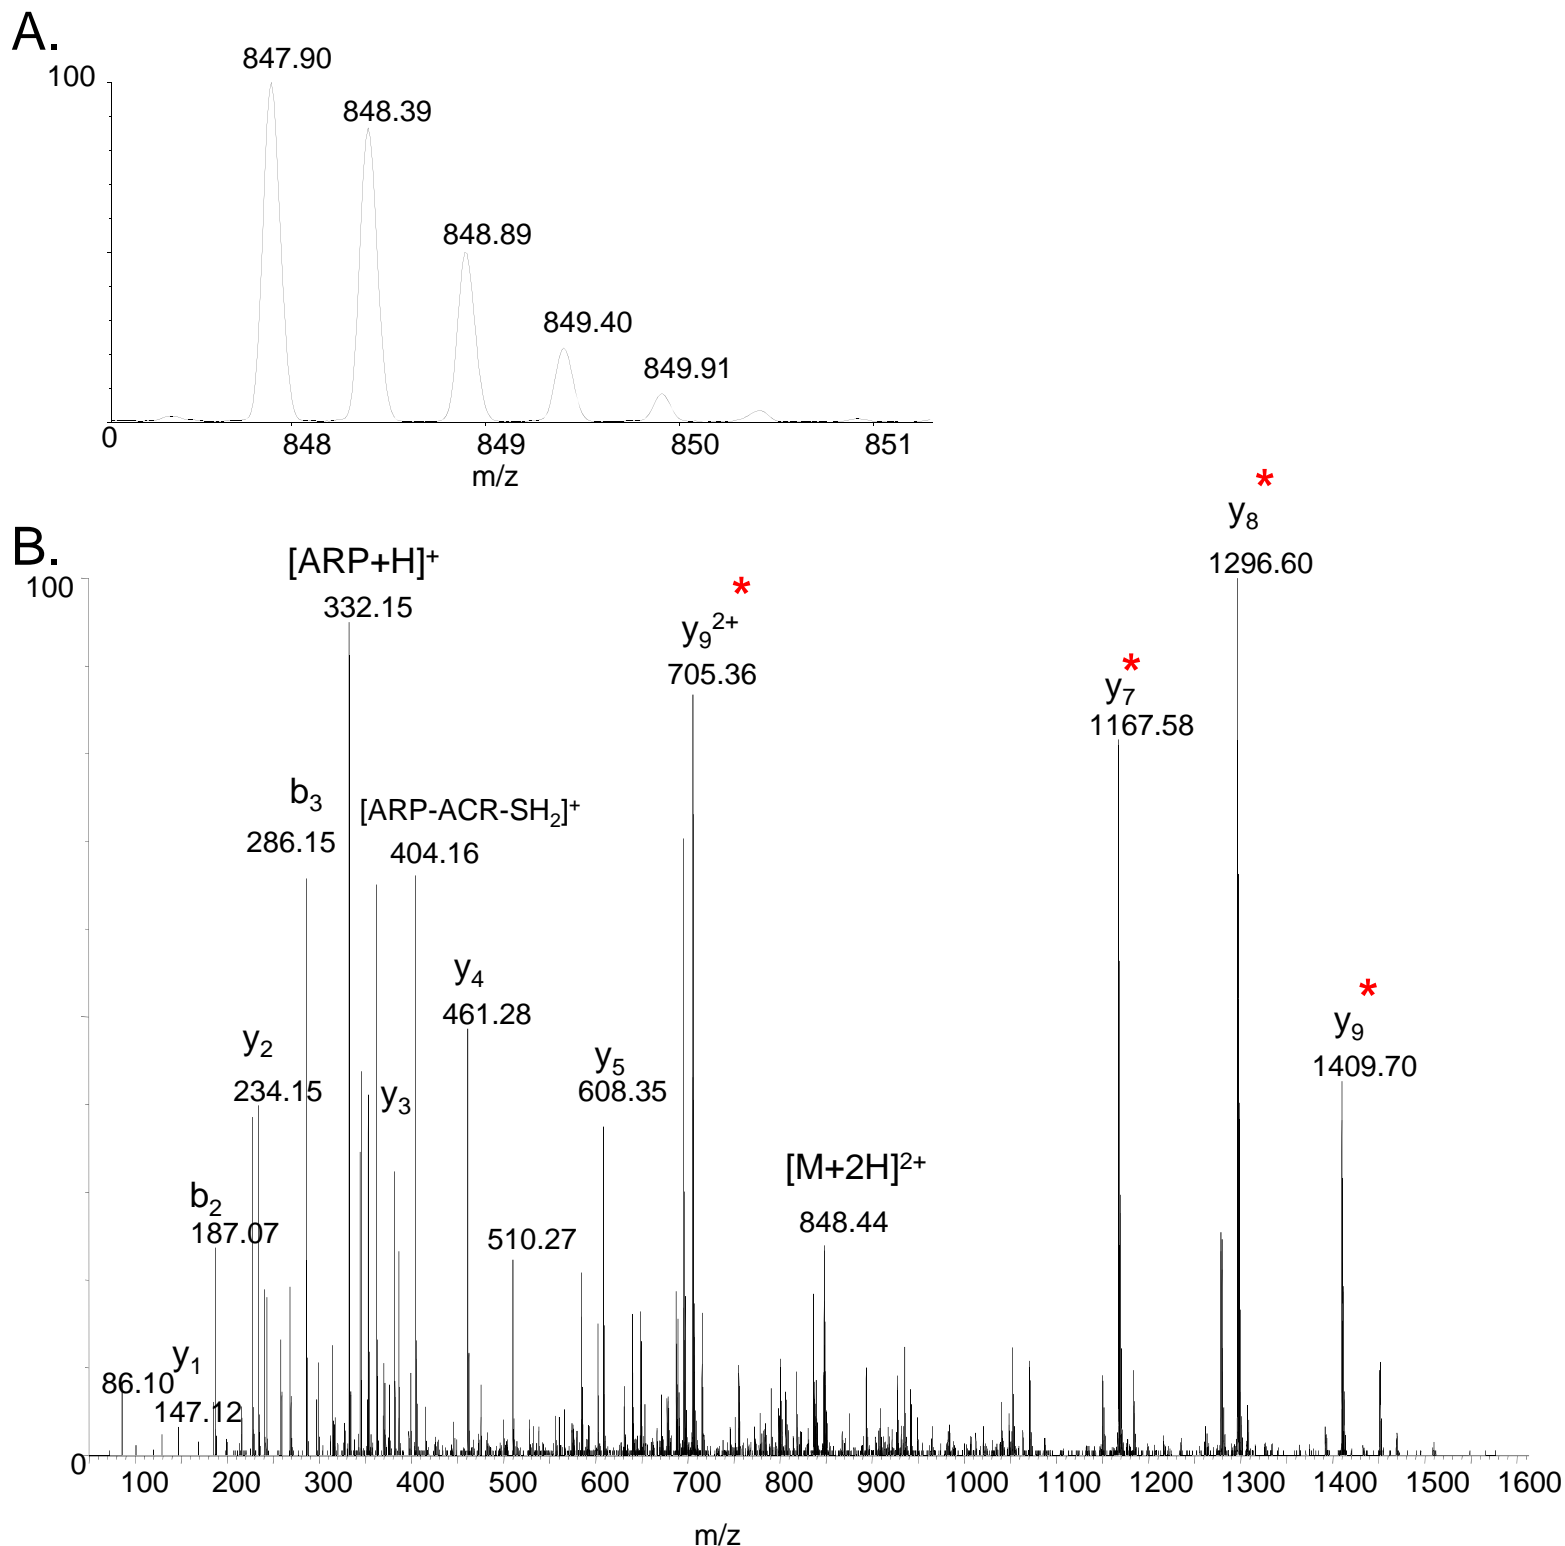

**Figure S56.** (A) Full mass spectrum and (B) MS/MS spectrum acquired by ESI-Q-TOF of the  $[M+2H]^{2+}$  ion of the ARP labeled, acrolein modified peptide EGVIEC\*SFVQSK; monoisotopic  $m/z_{\text{calc}}$  847.90; accuracy  $\Delta(m/z) = 0.00$  Da

# MDHM\_RAT: Malate dehydrogenase

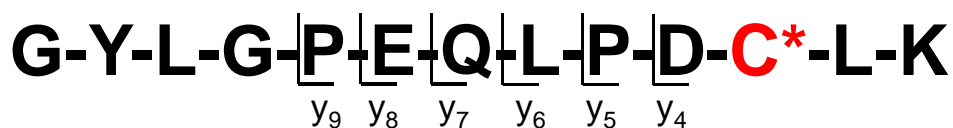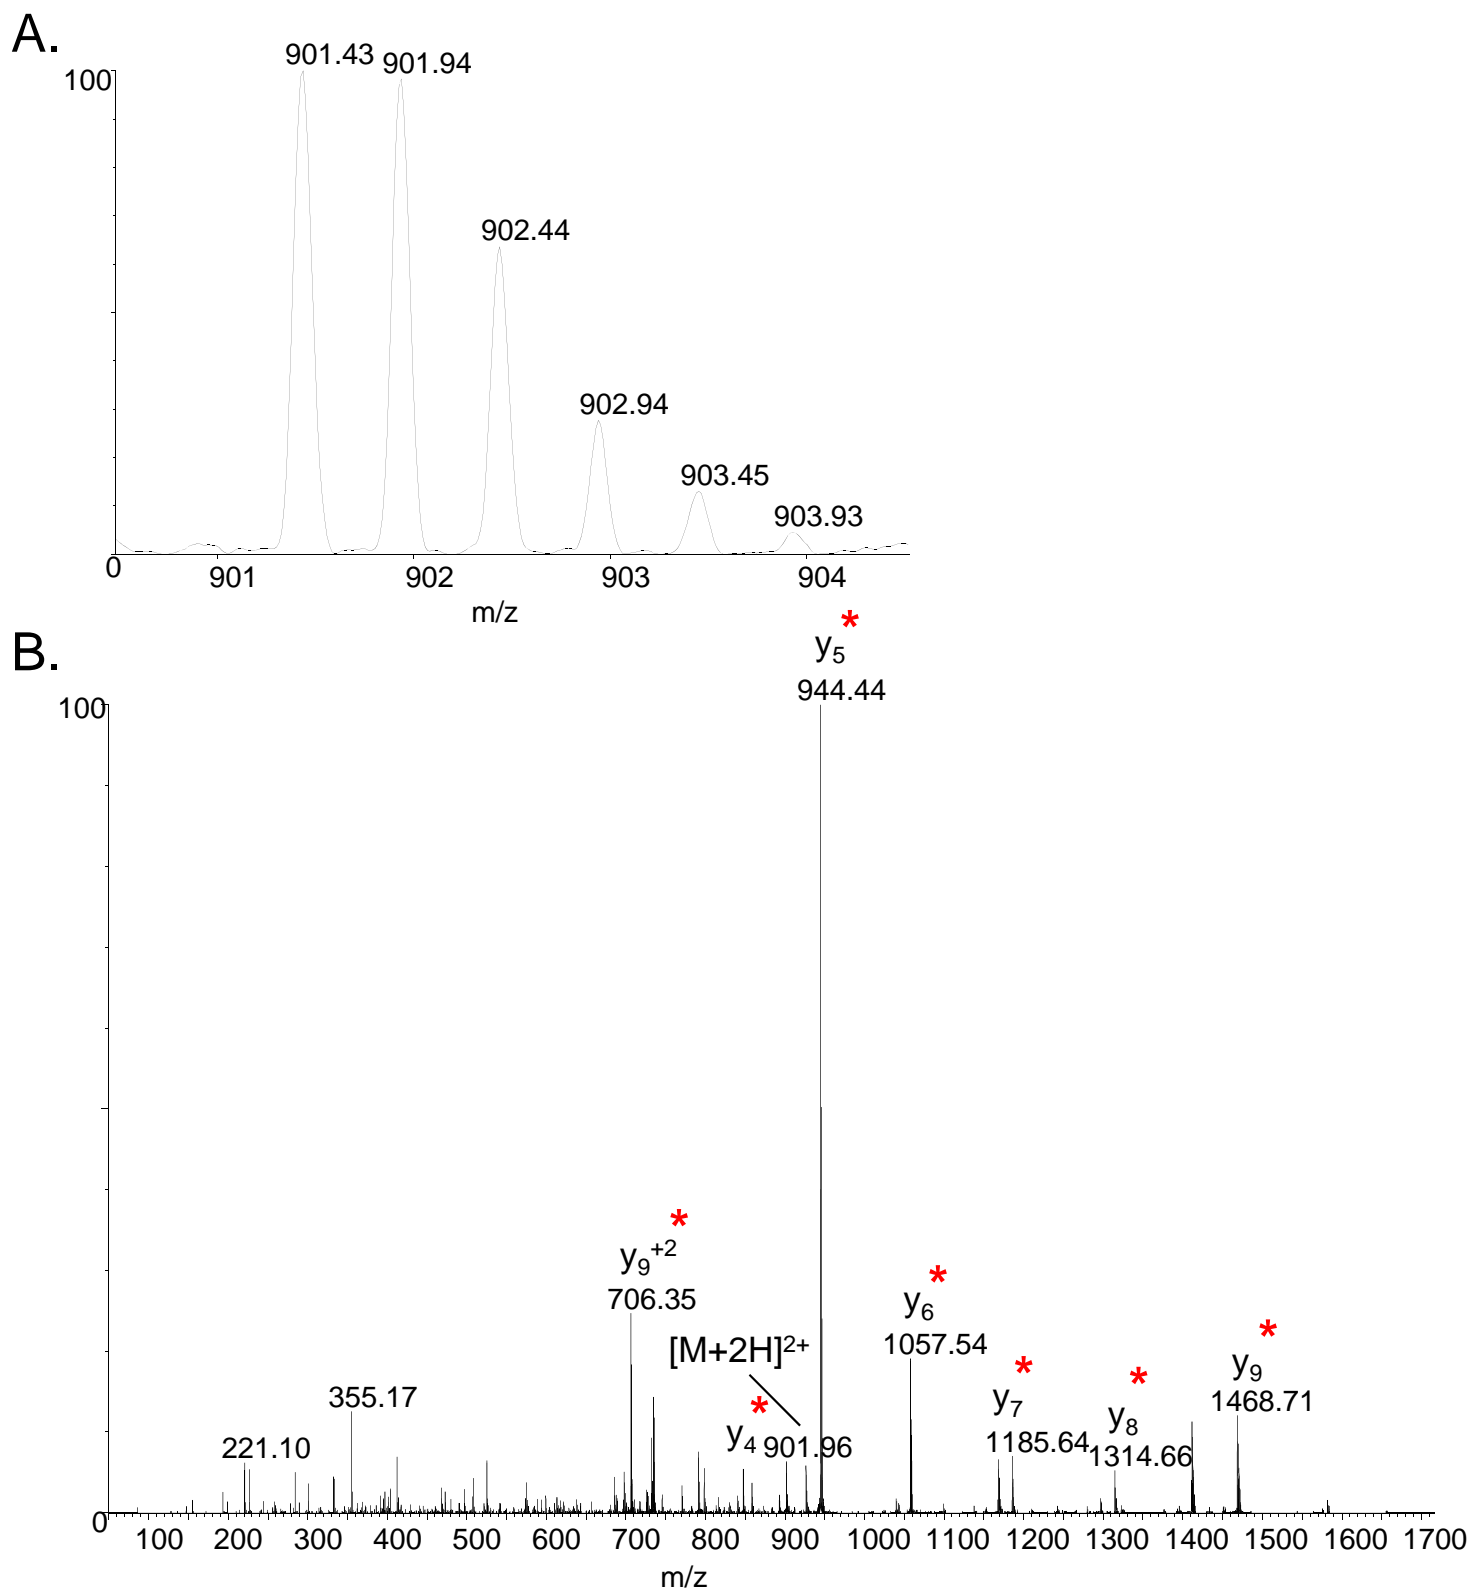

**Figure S57.** (A) Full mass spectrum and (B) MS/MS spectrum acquired by ESI-Q-TOF of the [M+2H]<sup>2+</sup> ion of the ARP labeled, acrolein modified peptide GYLGP-EQLPDC\*-LK; monoisotopic m/z<sub>calc</sub> 901.43; accuracy  $\Delta(m/z) = 0.00$  Da

# MDHM\_RAT: Malate dehydrogenase

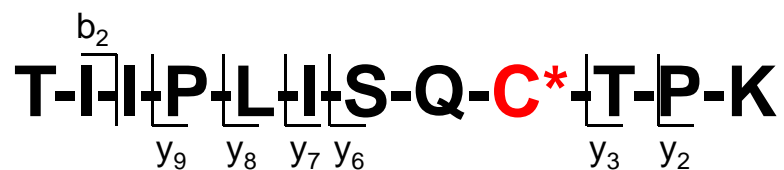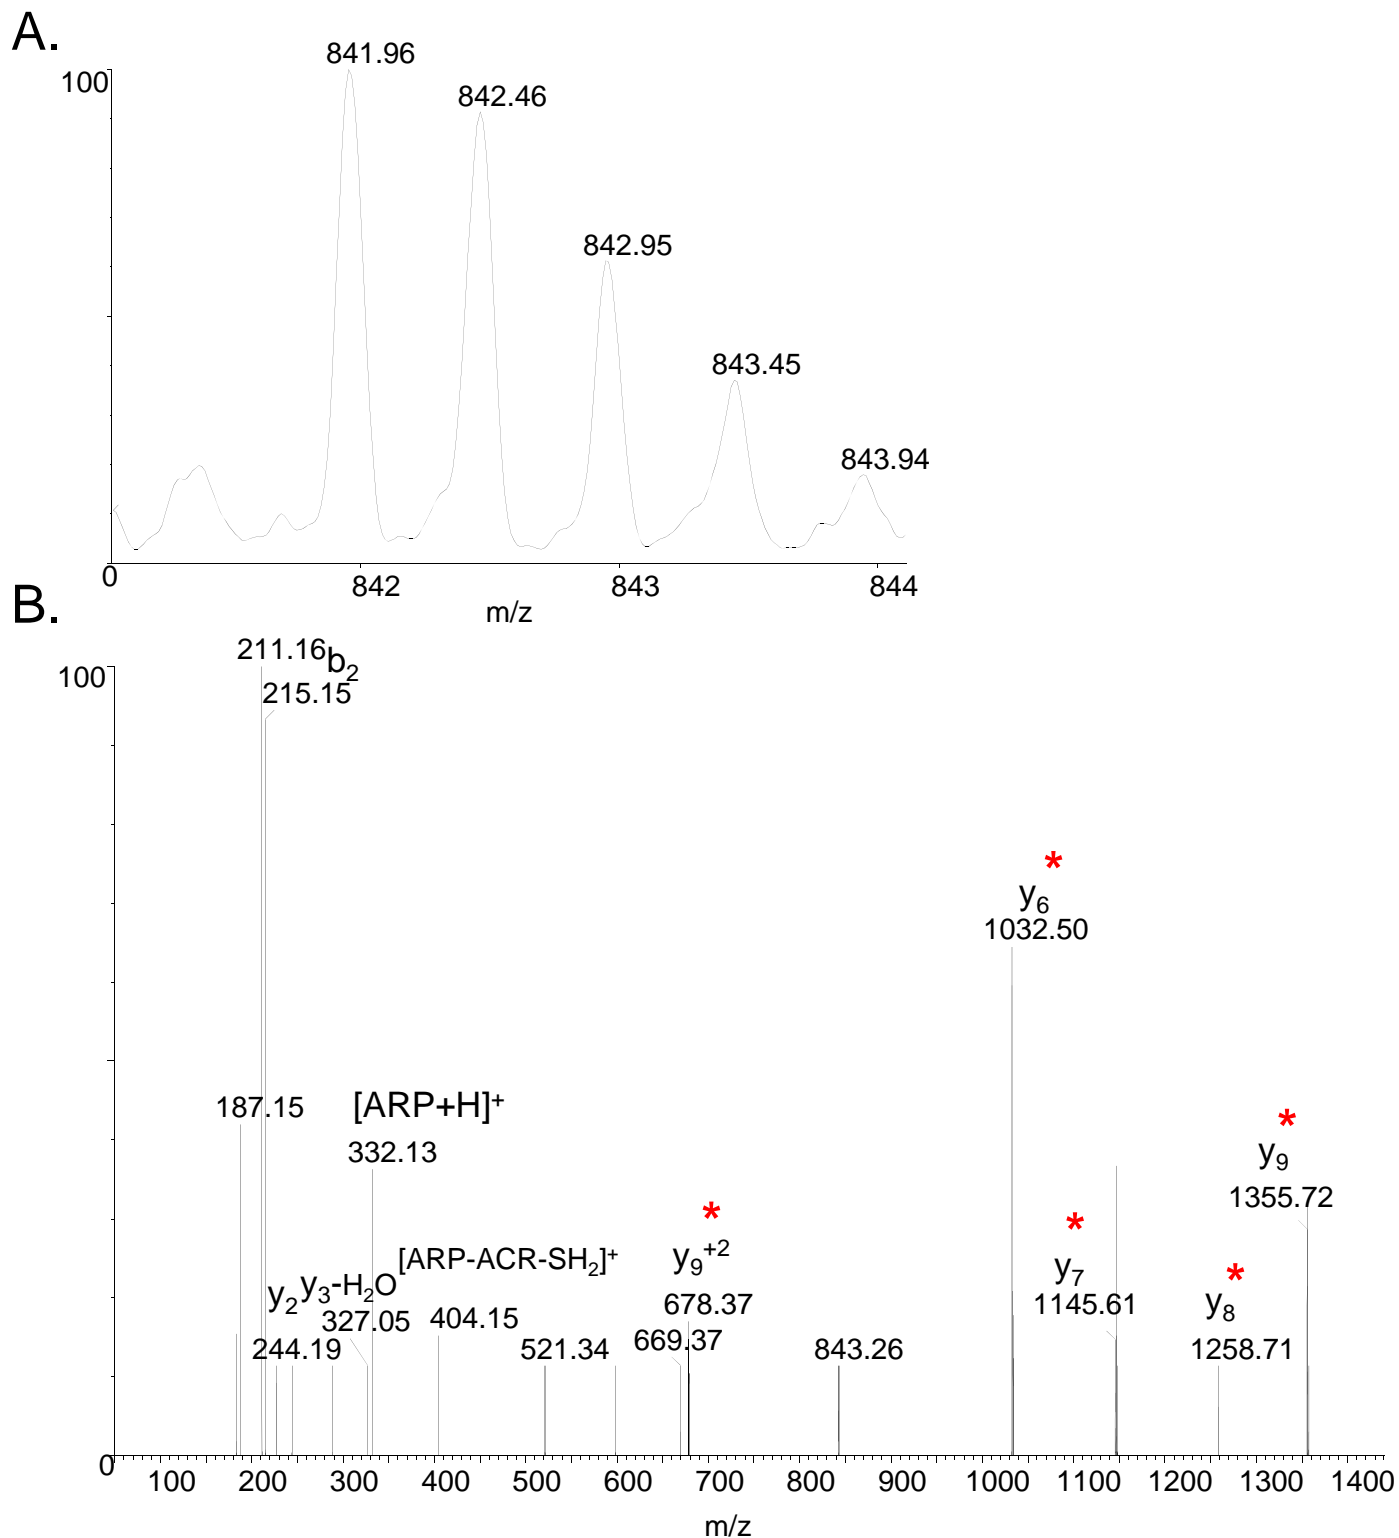

**Figure S58.** (A) Full mass spectrum and (B) MS/MS spectrum acquired by ESI-Q-TOF of the  $[M+2H]^{2+}$  ion of the ARP labeled, acrolein modified peptide TIIP LISQC\*TPK; monoisotopic  $m/z_{\text{calc}}$  841.95; accuracy  $\Delta(m/z) = 0.01$  Da

# MDHM\_RAT: Malate dehydrogenase

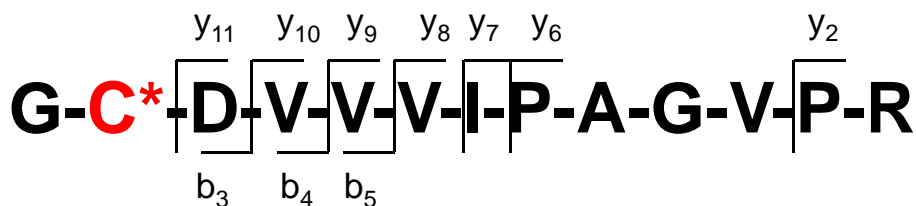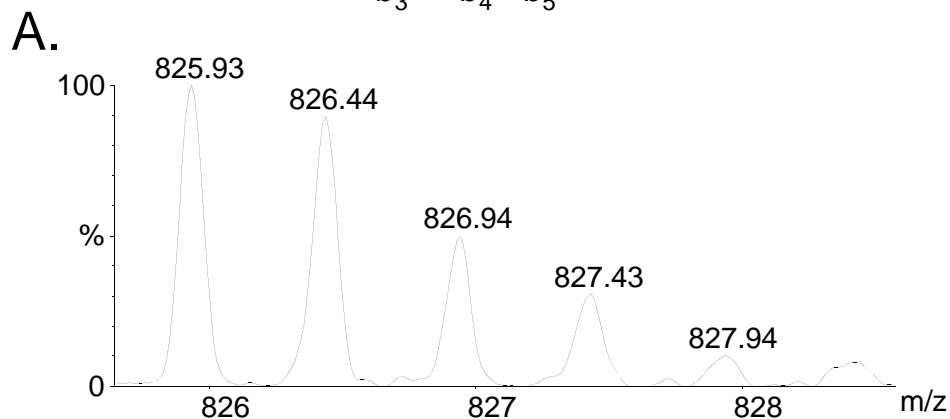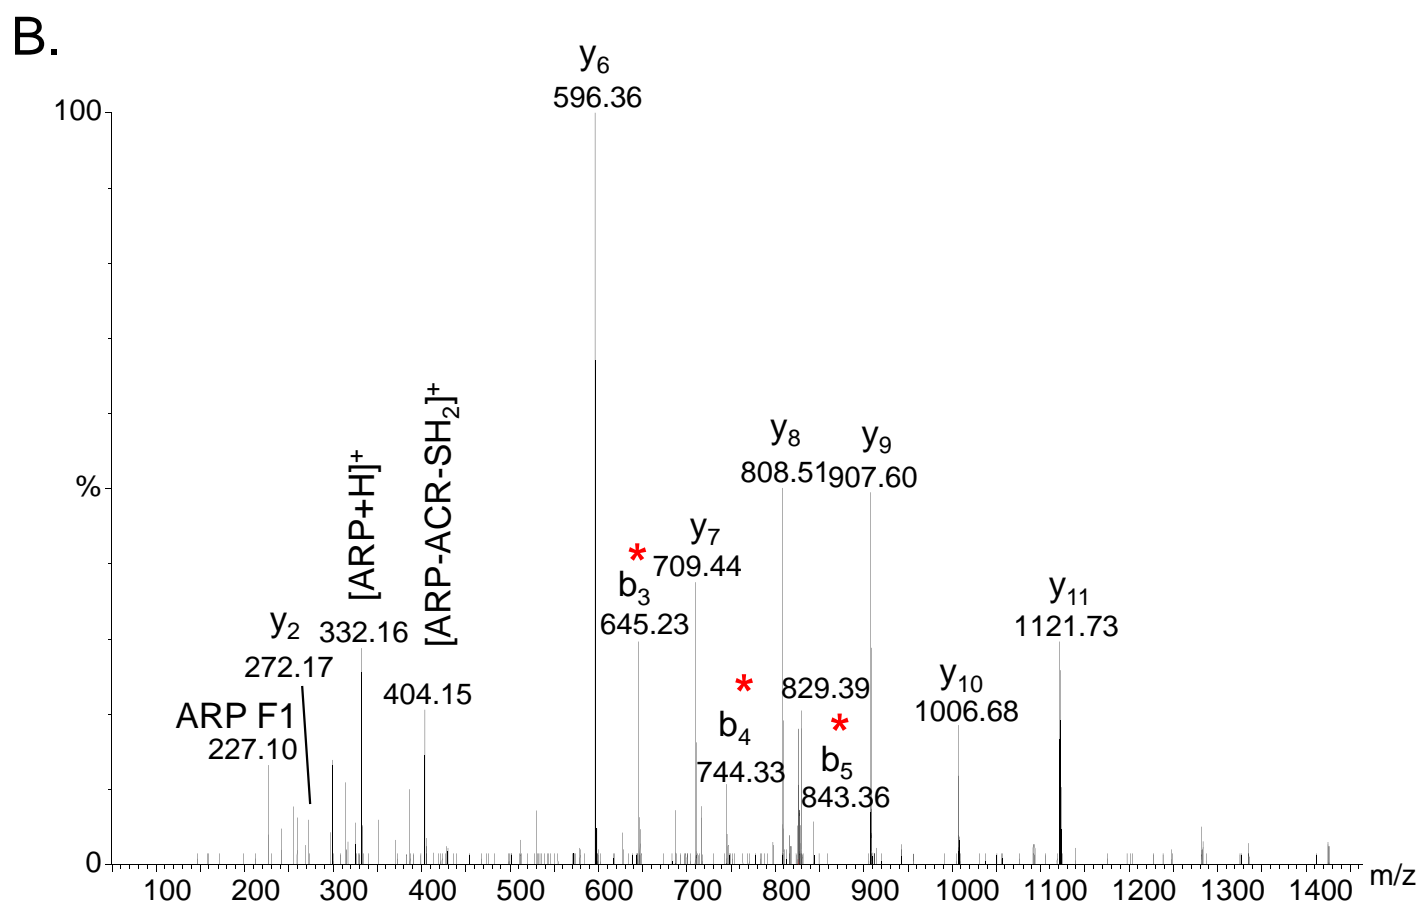

**Figure S59.** (A) Full mass spectrum and (B) MS/MS spectrum acquired by ESI-Q-TOF of the  $[M+2H]^{2+}$  ion of the ARP labeled, acrolein modified peptide GC\*DVVVIPAGVPR; monoisotopic  $m/z_{calc}$  825.93; accuracy  $\Delta(m/z) = 0.00$  Da

# ODPA\_RAT: Pyruvate dehydrogenase E1 component alpha subunit

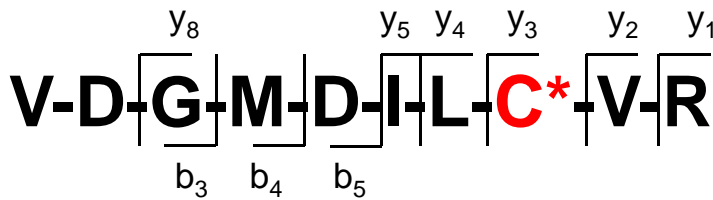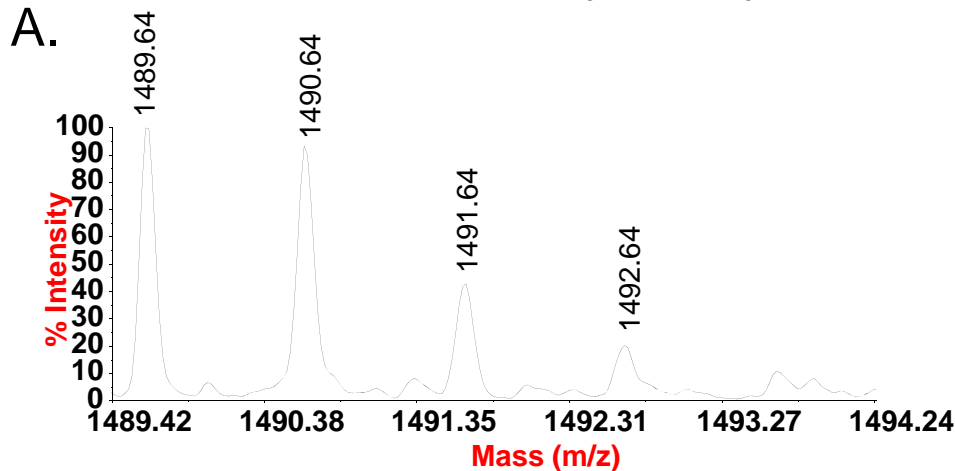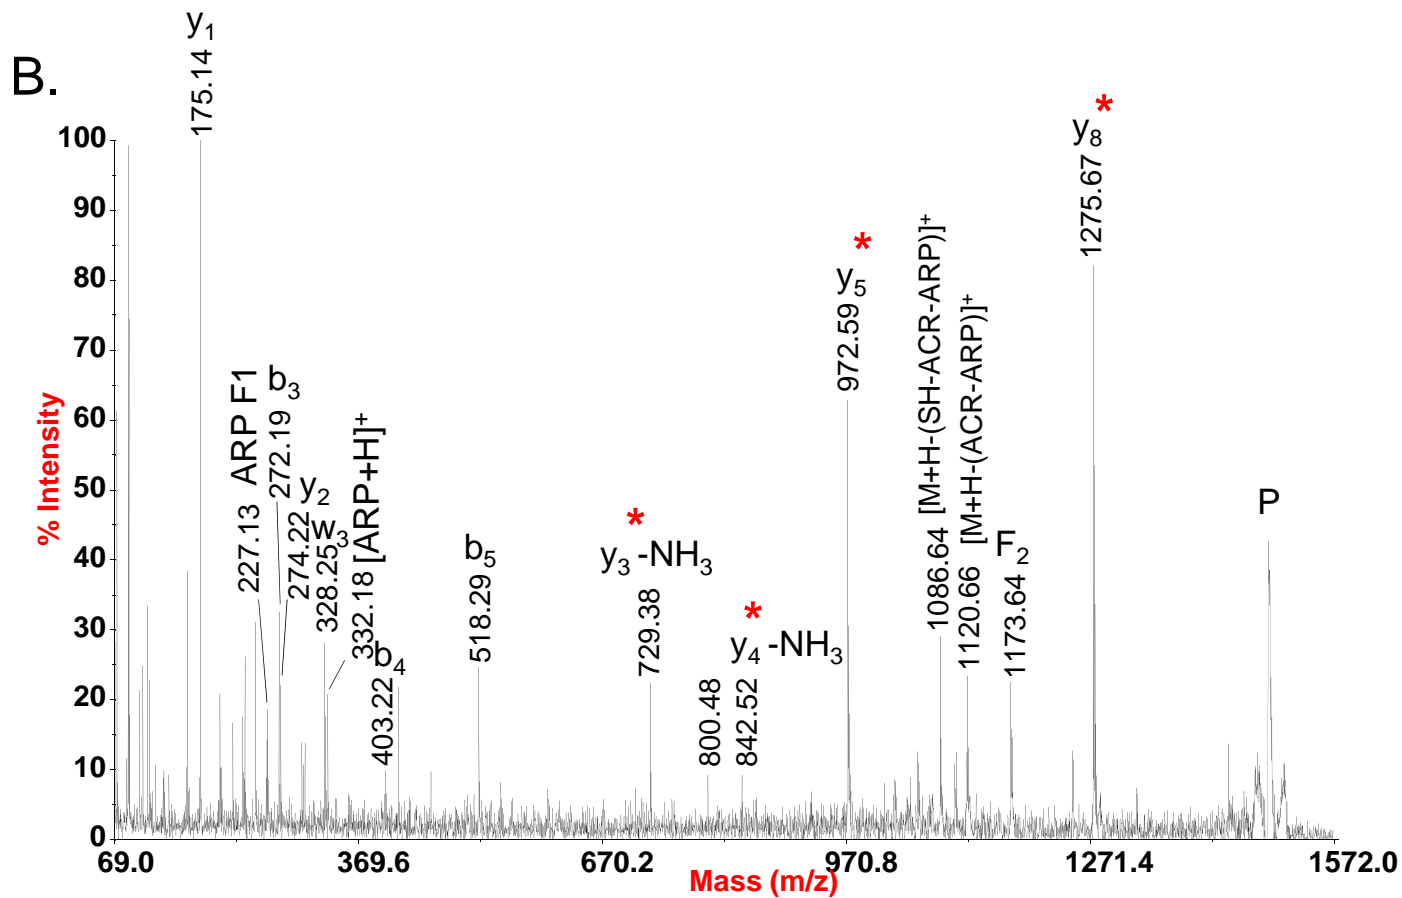

**Figure S60.** (A) Full mass spectrum and (B) MS/MS spectrum acquired by MALDI-TOF/TOF of the [M+H]<sup>+</sup> ion of the ARP labeled, acrolein modified peptide VDGMDILC\*VR; monoisotopic  $m/z_{calc}$  1489.70; accuracy  $\Delta(m/z) = -0.06$  Da

# ODPA\_RAT: Pyruvate dehydrogenase E1 component alpha subunit

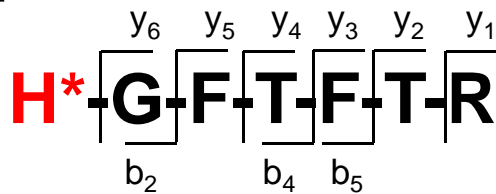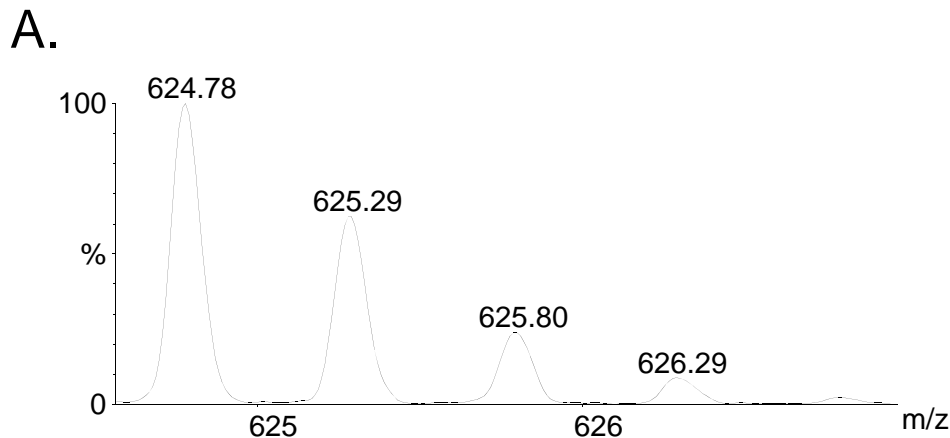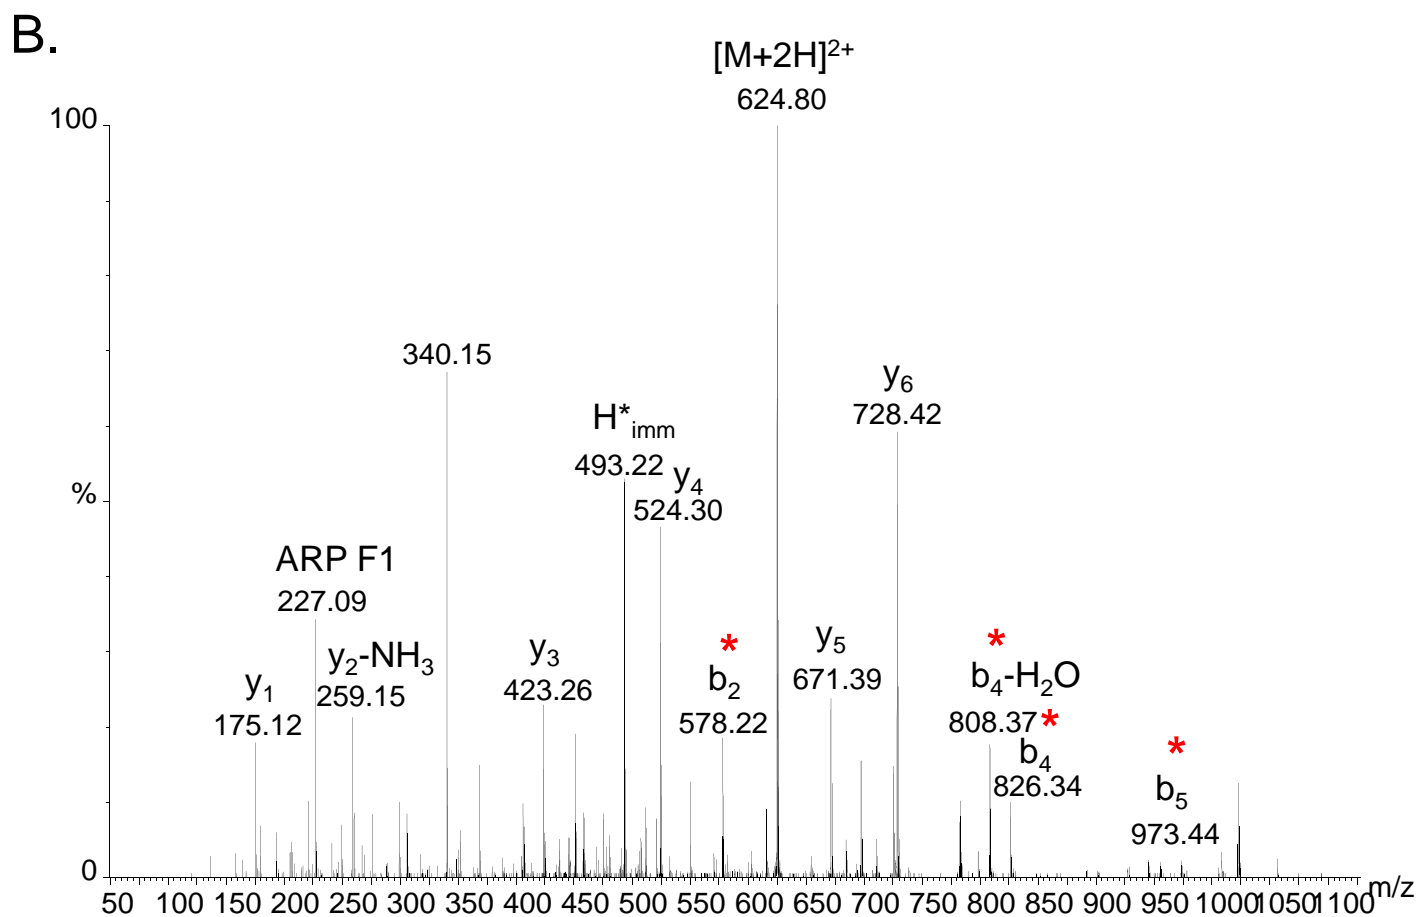

**Figure S61.** (A) Full mass spectrum and (B) MS/MS spectrum acquired by ESI-Q-TOF of the  $[M+2H]^{2+}$  ion of the ARP labeled, crotonaldehyde modified peptide  $H^*GFTFTR$ ; monoisotopic  $m/z_{calc}$  624.80; accuracy  $\Delta(m/z) = -0.02$  Da

# ODPB\_RAT: Pyruvate dehydrogenase E1 component beta subunit

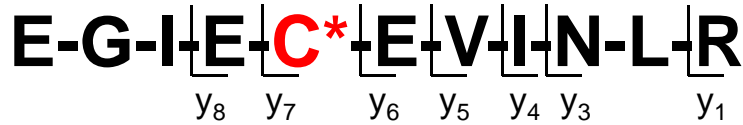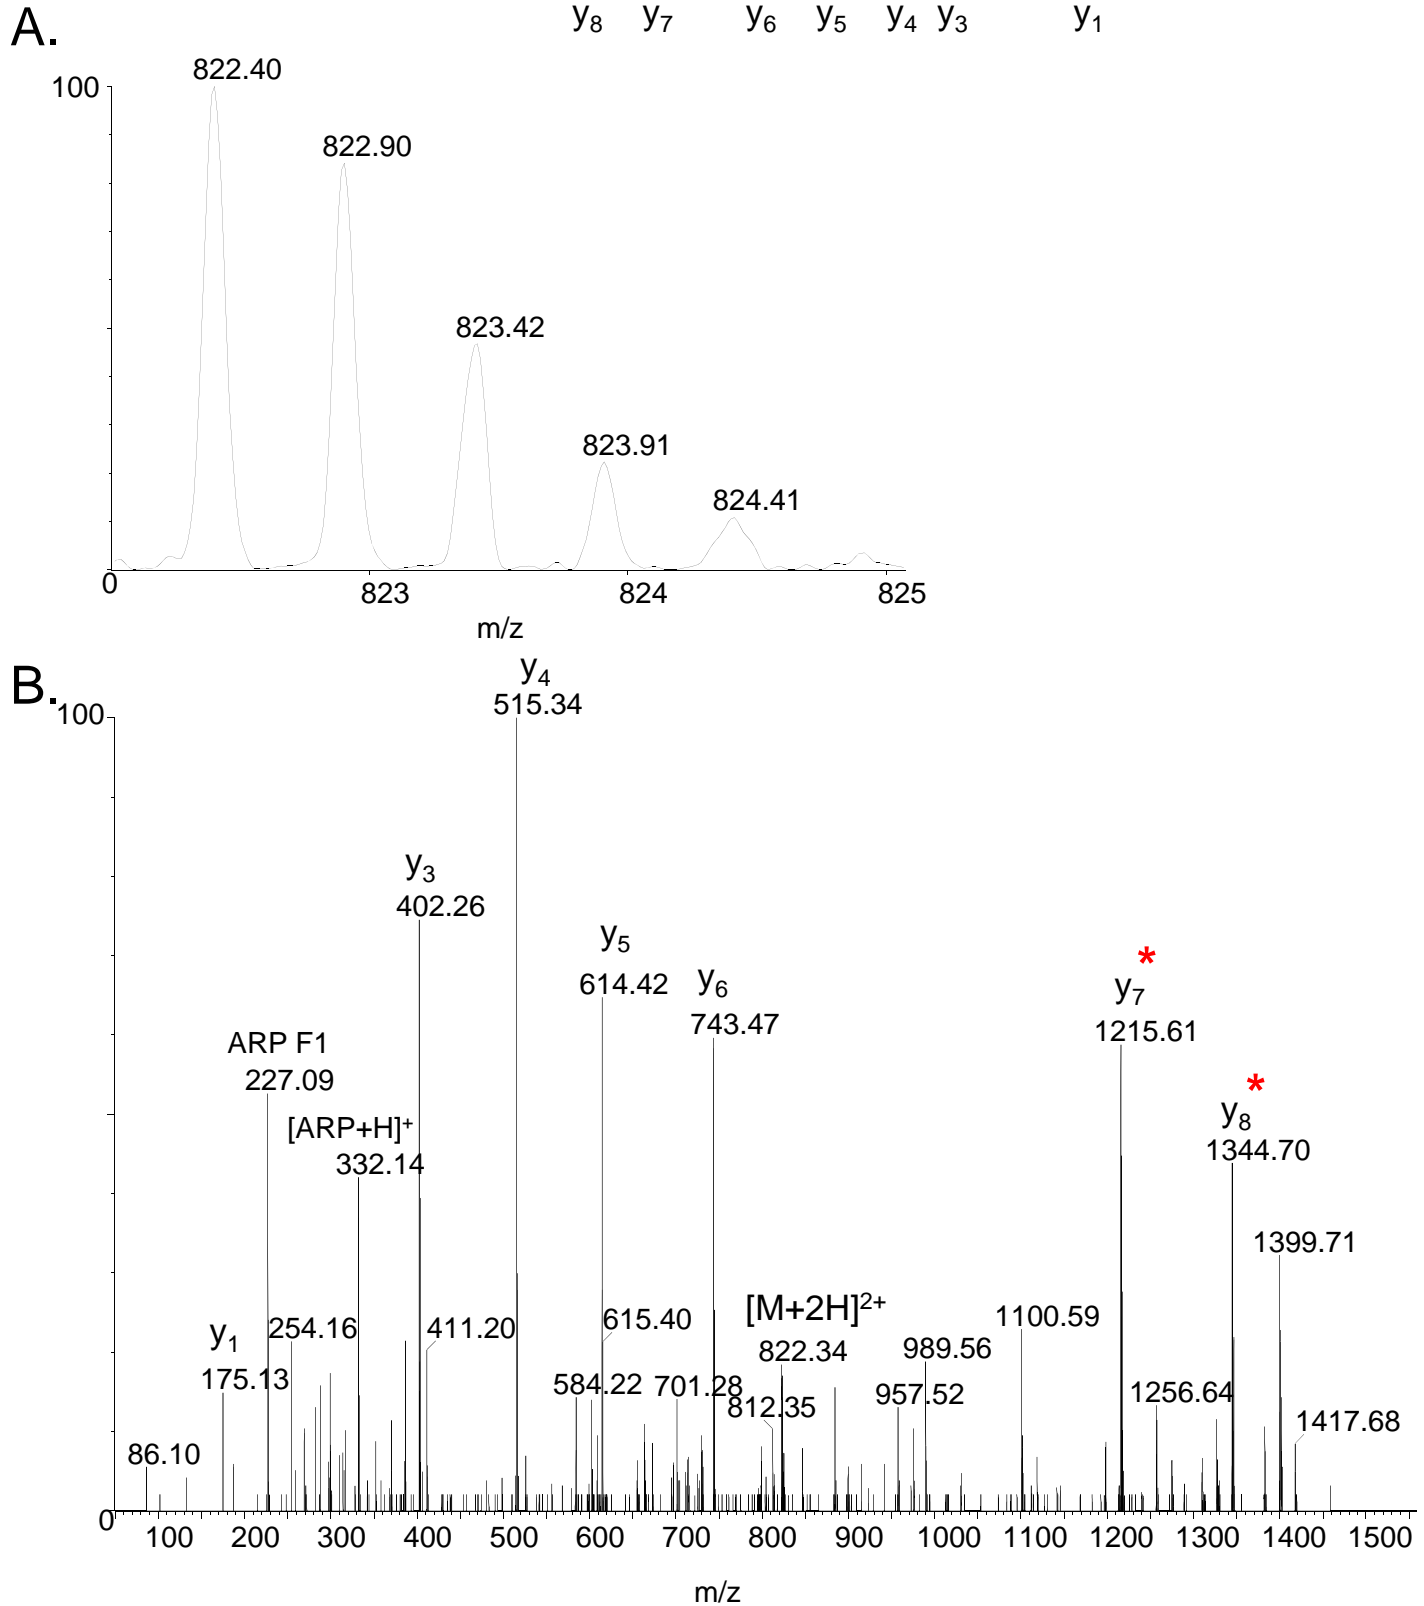

**Figure S62.** (A) Full mass spectrum and (B) MS/MS spectrum acquired by ESI-Q-TOF of the  $[M+2H]^{2+}$  ion of the ARP labeled, acrolein modified peptide EGIEC\*EVINLR; monoisotopic  $m/z_{calc}$  822.40; accuracy  $\Delta(m/z) = 0.00$  Da

# ETFD\_RAT: Electron transfer flavoprotein-ubiquinone oxidoreductase

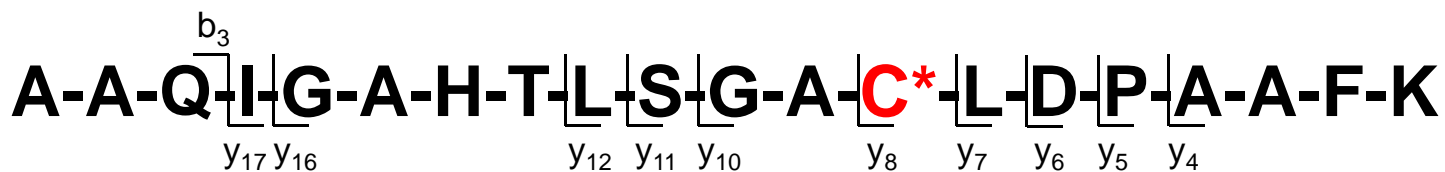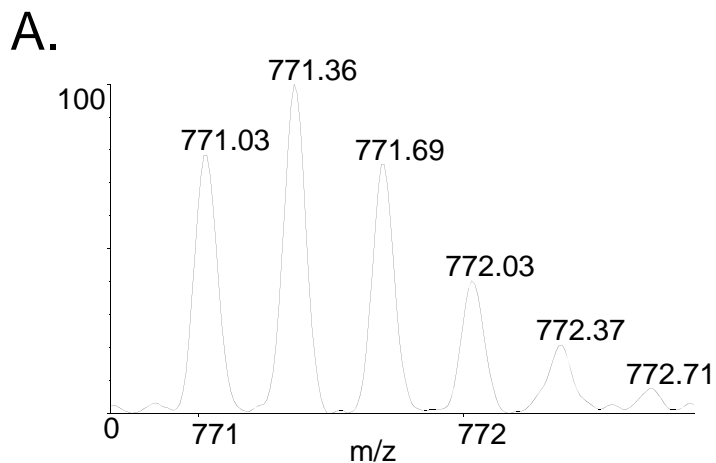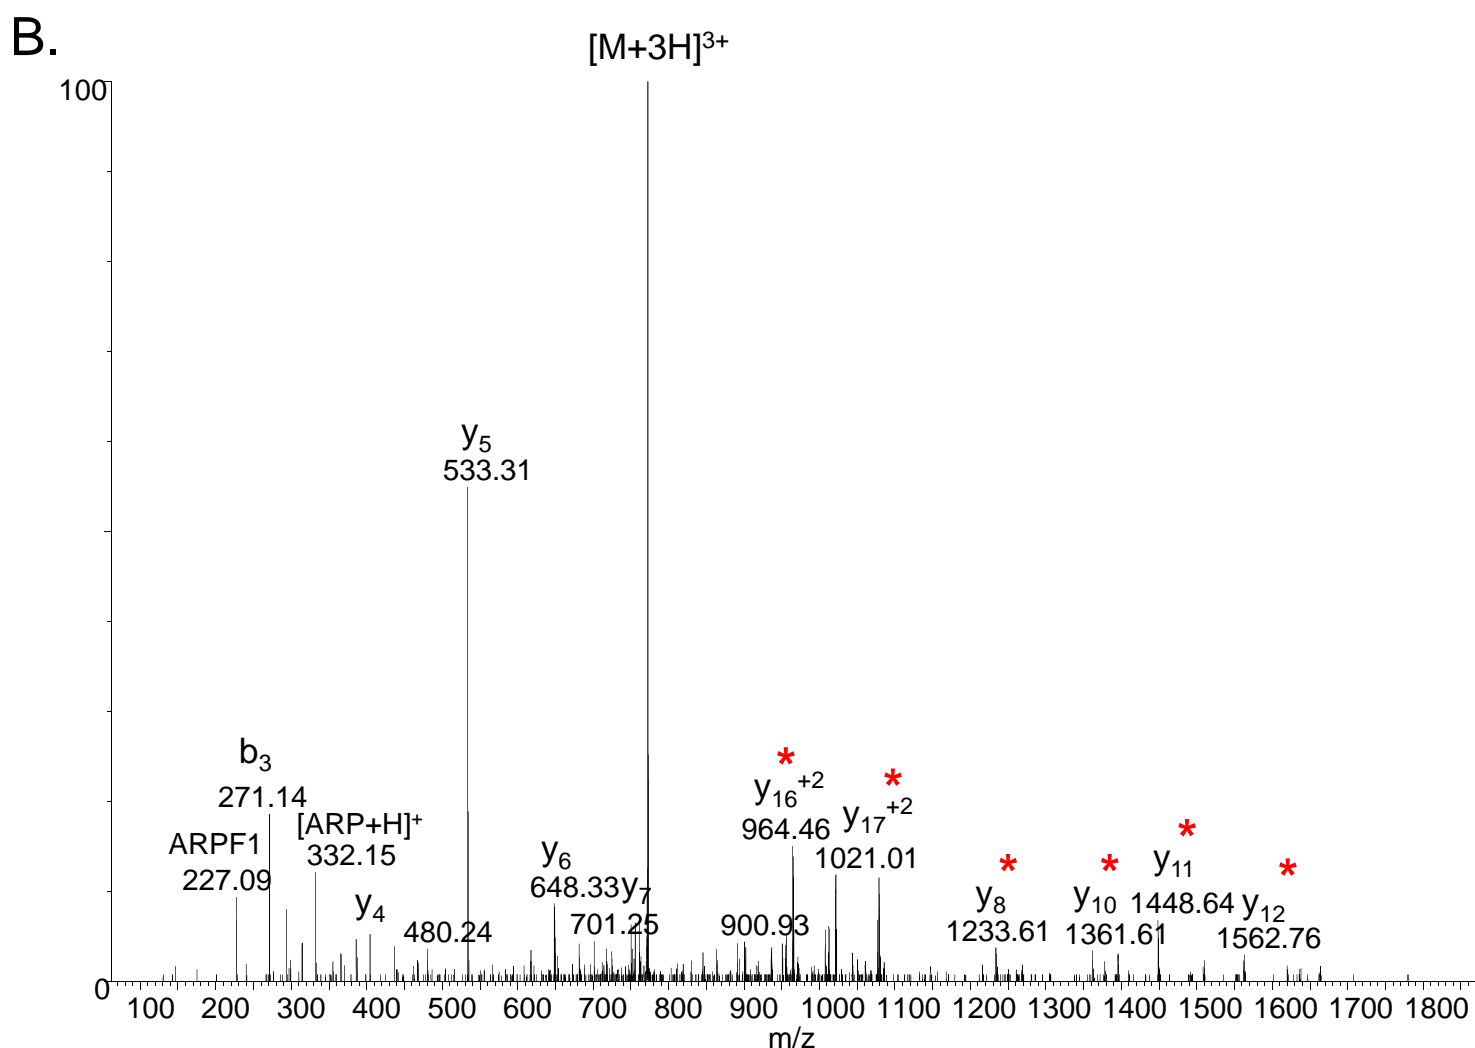

**Figure S63.** (A) Full mass spectrum and (B) MS/MS spectrum acquired by ESI-Q-TOF of the  $[M+3H]^{3+}$  ion of the ARP labeled, acrolein modified peptide AAQIGAHTLSGAC\*LDPAAFK; monoisotopic  $m/z_{\text{calc}}$  771.05; accuracy  $\Delta(m/z) = -0.02$  Da



# ETFD\_RAT: Electron transfer flavoprotein-ubiquinone oxidoreductase

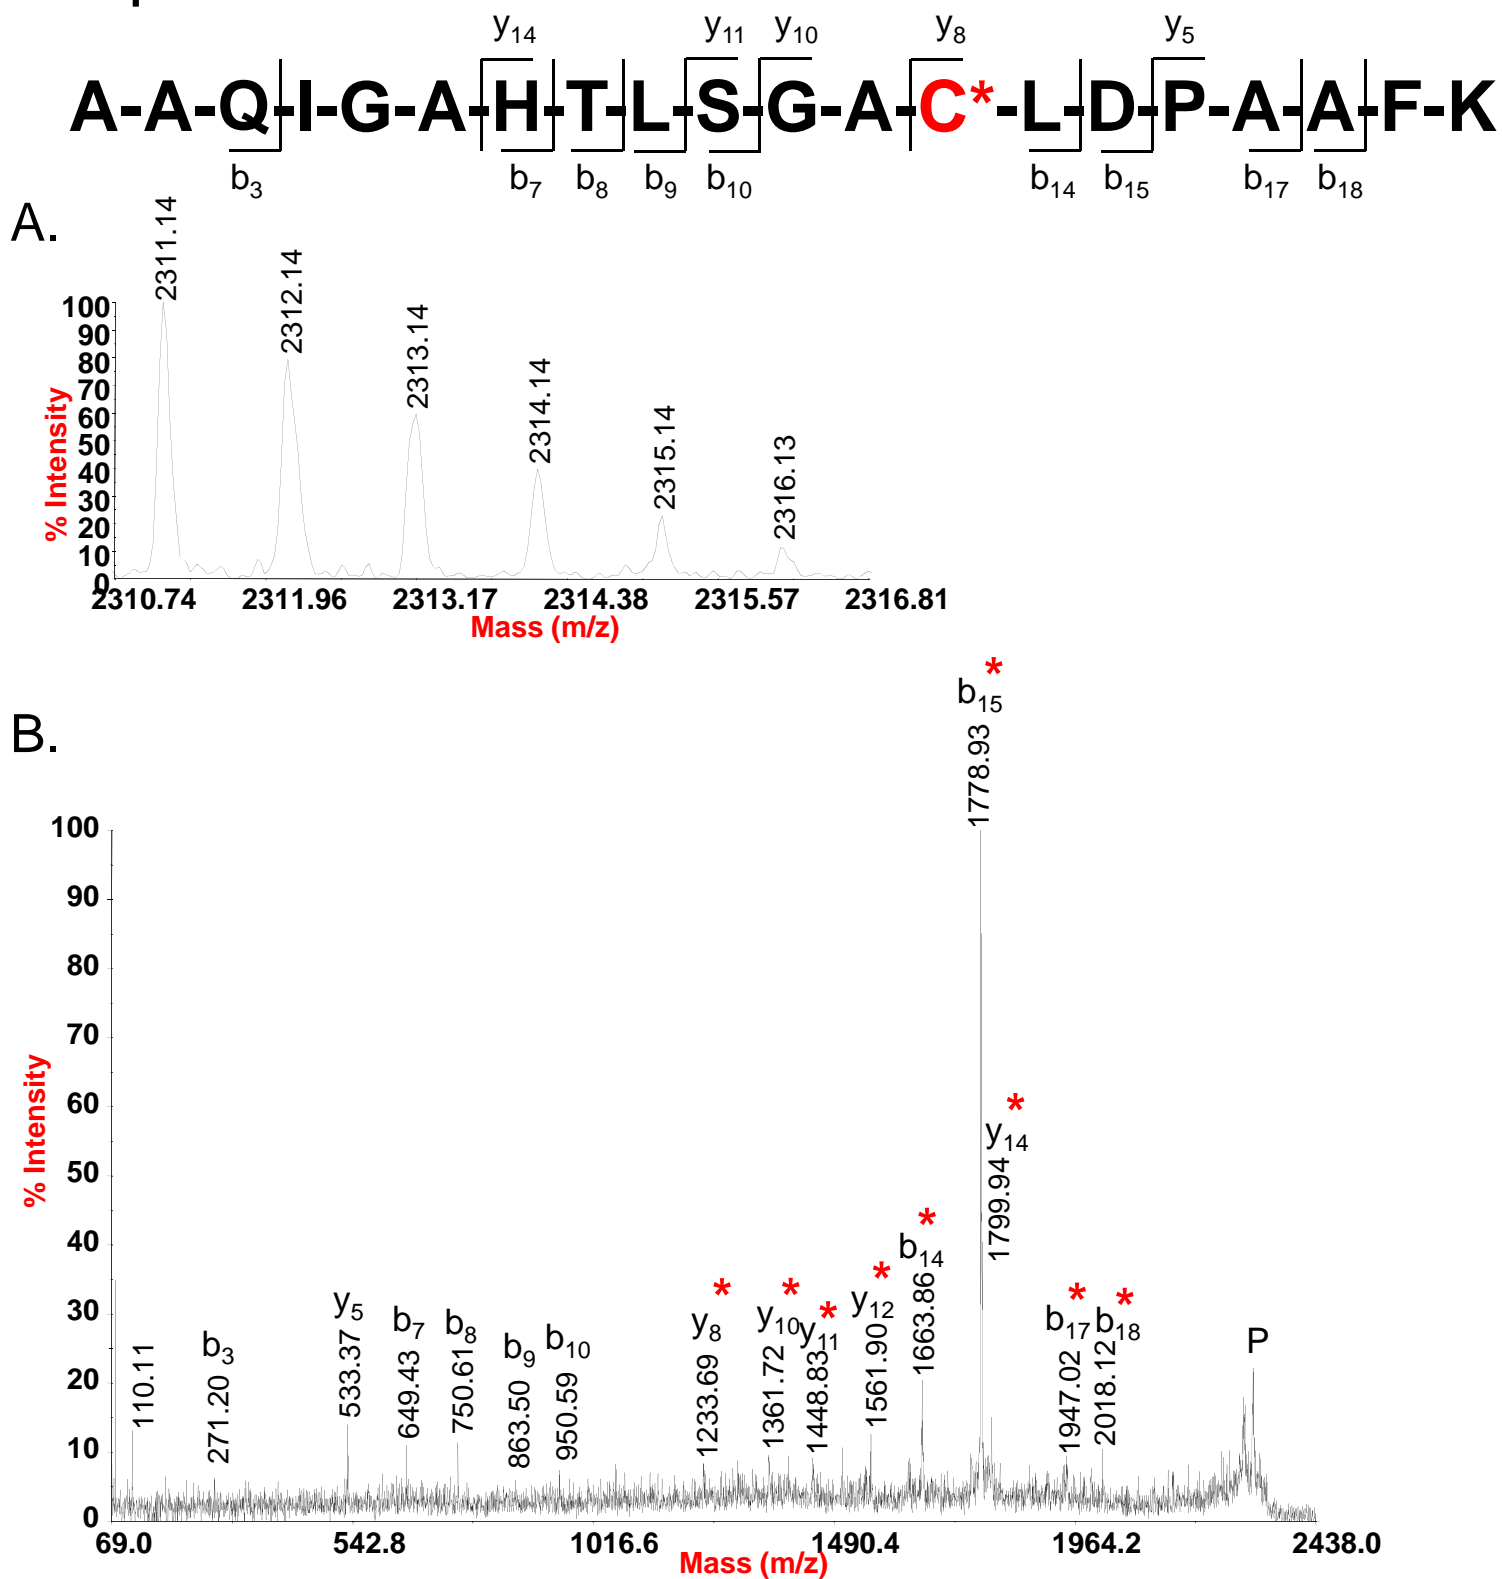

# MMSA\_RAT: Methylmalonate-semialdehyde dehydrogenase

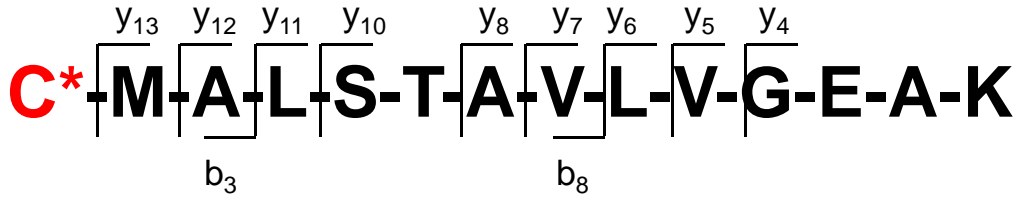

A.

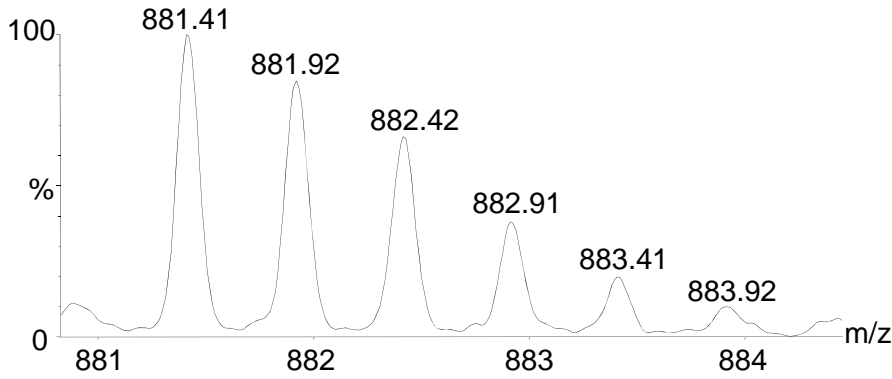

B.

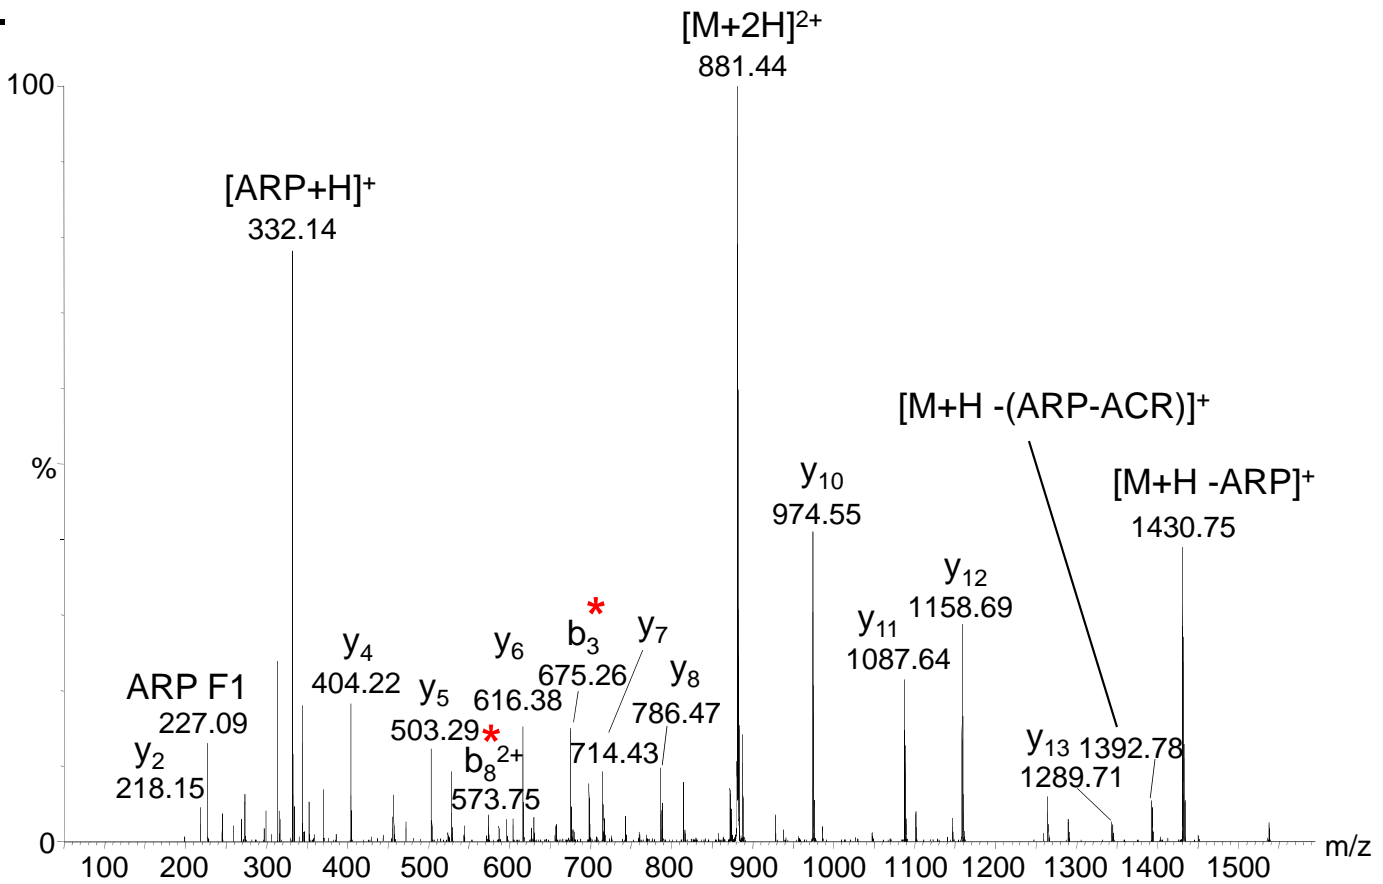

**Figure S65.** (A) Full mass spectrum and (B) MS/MS spectrum acquired by ESI-Q-TOF of the  $[M+2H]^{2+}$  ion of the ARP labeled, acrolein modified peptide  $C^*$ MALSTAVLVGEAK; monoisotopic  $m/z_{\text{calc}}$  881.44; accuracy  $\Delta(m/z) = -0.03$  Da

# MMSA\_RAT: Methylmalonate-semialdehyde dehydrogenase

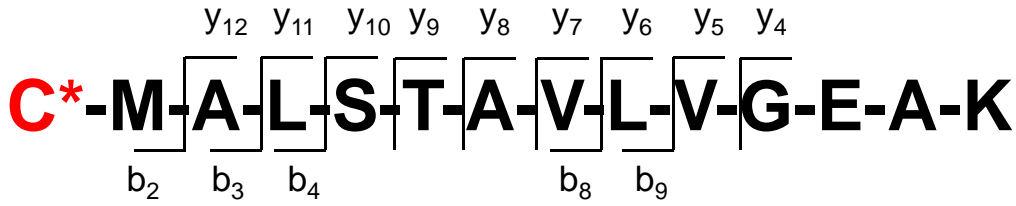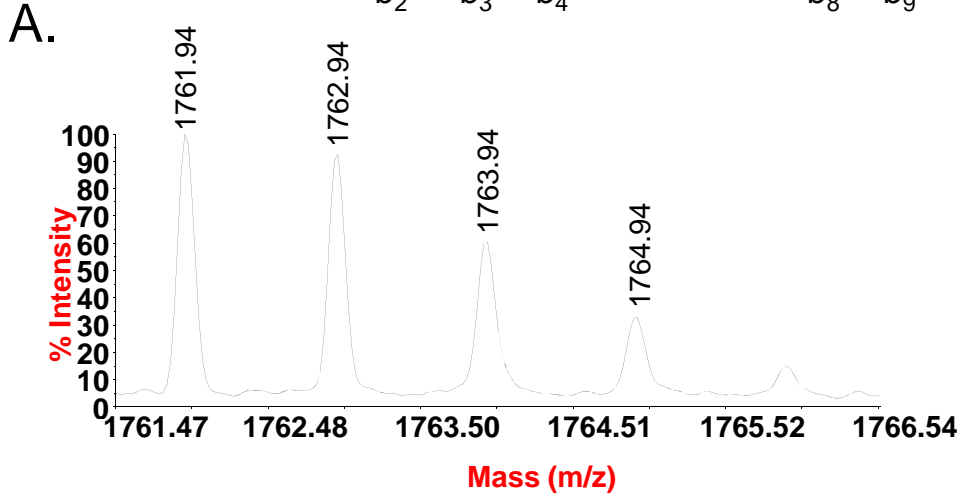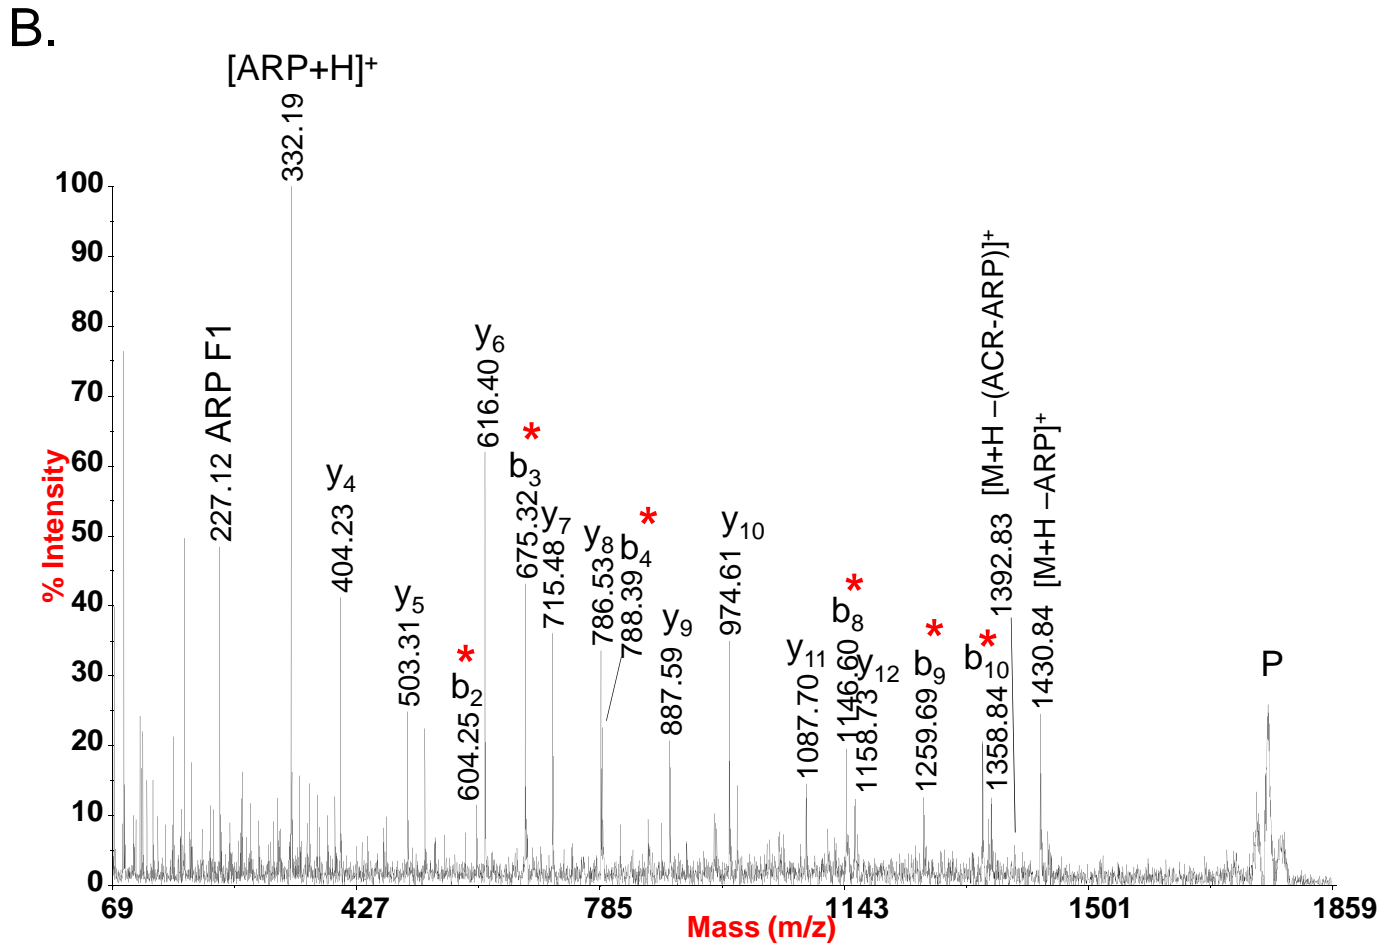

**Figure S66.** (A) Full mass spectrum and (B) MS/MS spectrum acquired by MALDI-TOF/TOF of the  $[M+H]^+$  ion of the ARP labeled, acrolein modified peptide C\*MALSTAVLVGEAK; monoisotopic  $m/z_{\text{calc}}$  1761.87; accuracy  $\Delta(m/z) = 0.07$  Da

# NNTM\_MOUSE: NAD(P) transhydrogenase

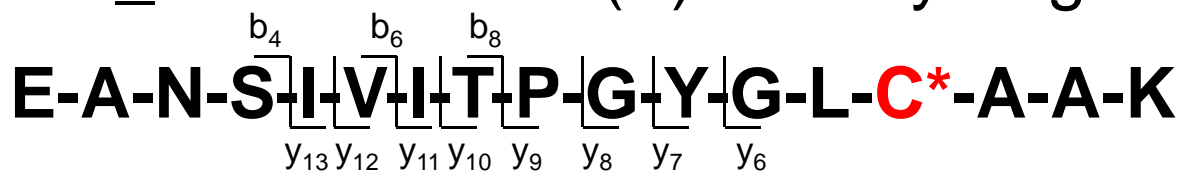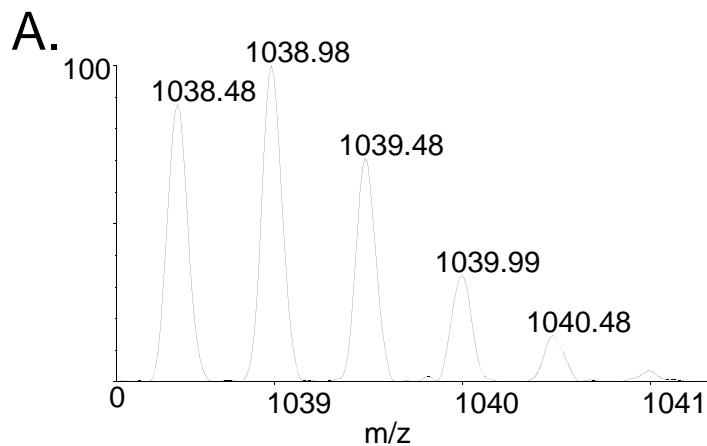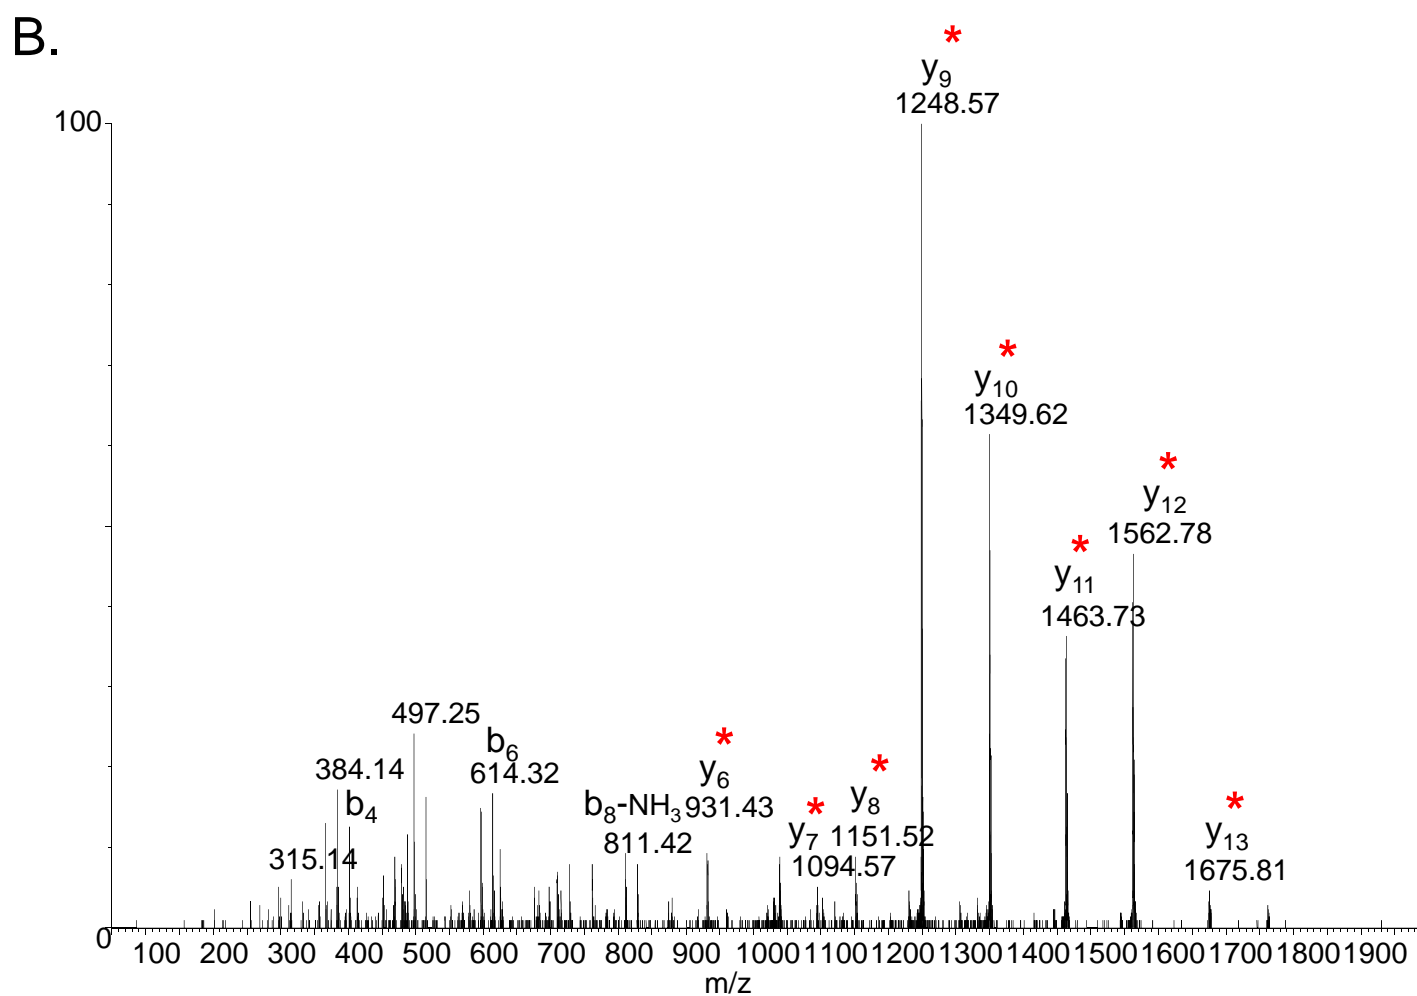

**Figure S67.** (A) Full mass spectrum and (B) MS/MS spectrum acquired by ESI-Q-TOF of the  $[M+2H]^{2+}$  ion of the ARP labeled, acrolein modified peptide EANSIVITPGYGLC\*AAK; monoisotopic  $m/z_{calc}$  1038.52; accuracy  $\Delta(m/z) = -0.04$  Da

# NNTM\_MOUSE: NAD(P) transhydrogenase

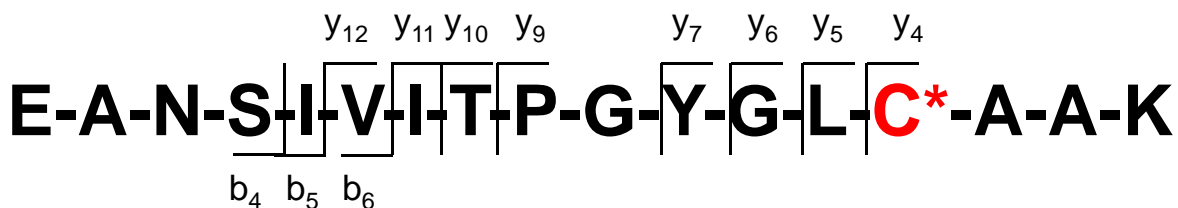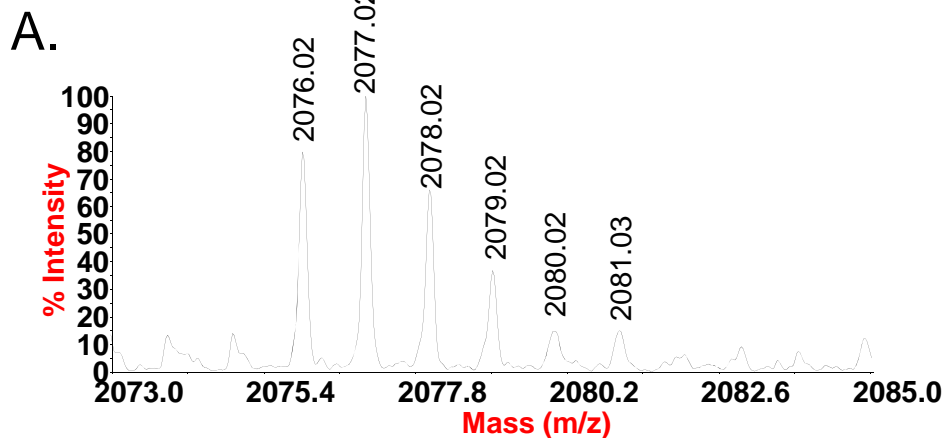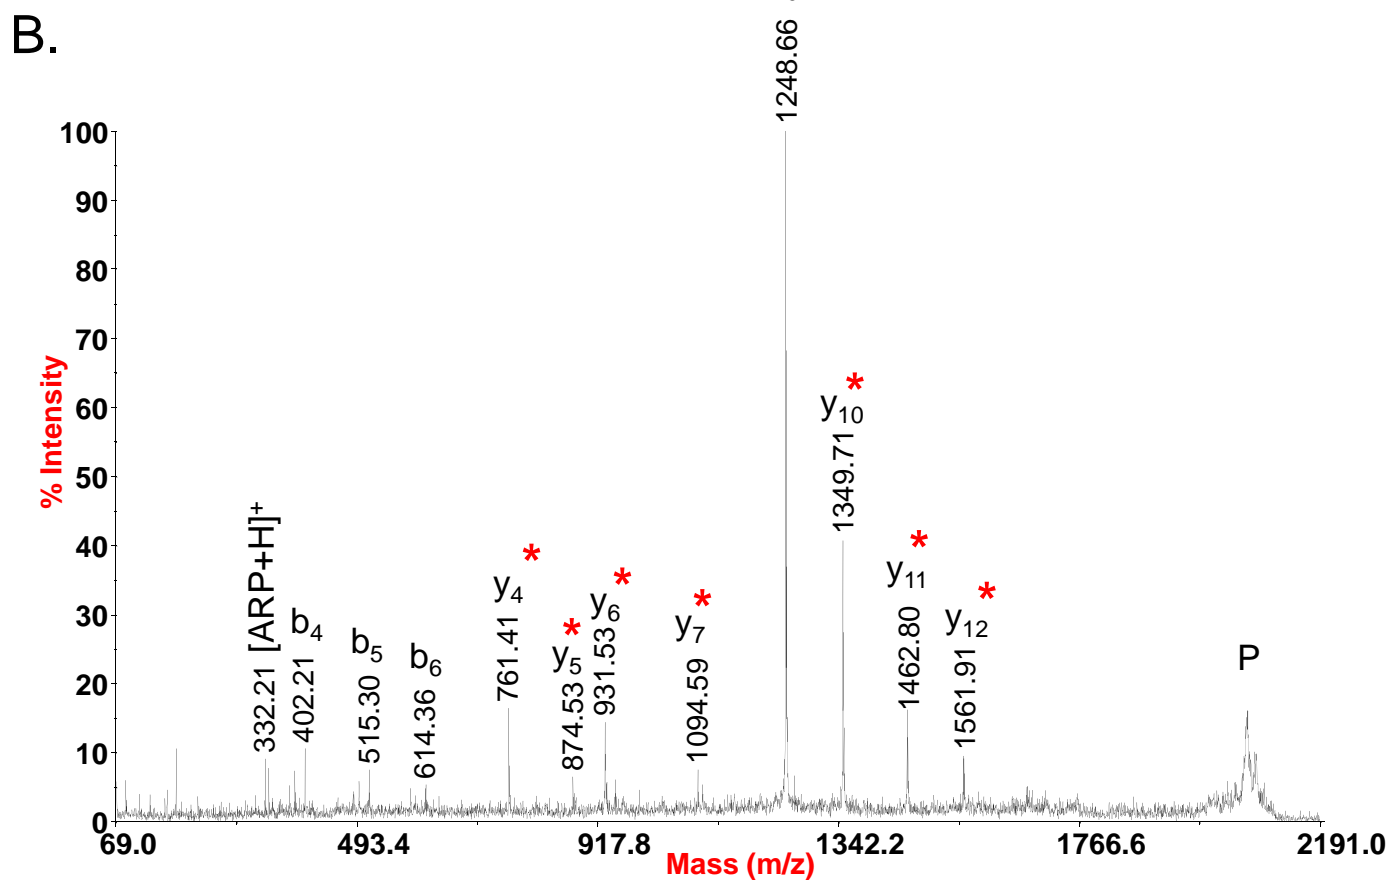

**Figure S68.** (A) Full mass spectrum and (B) MS/MS spectrum acquired by MALDI-TOF/TOF of the [M+H]<sup>+</sup> ion of the ARP labeled, acrolein modified peptide EANSIVITPGYGLC\*AAK; monoisotopic m/z<sub>calc</sub> 2076.03; accuracy  $\Delta(m/z) = -0.01$  Da

# CH60\_RAT: 60kDa heat shock protein

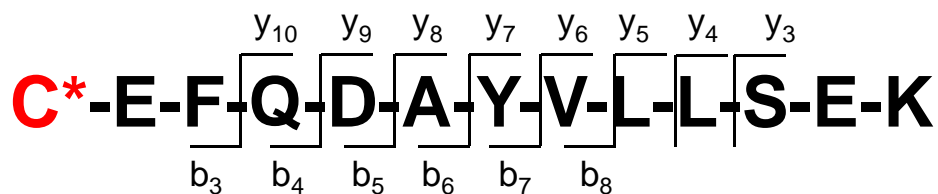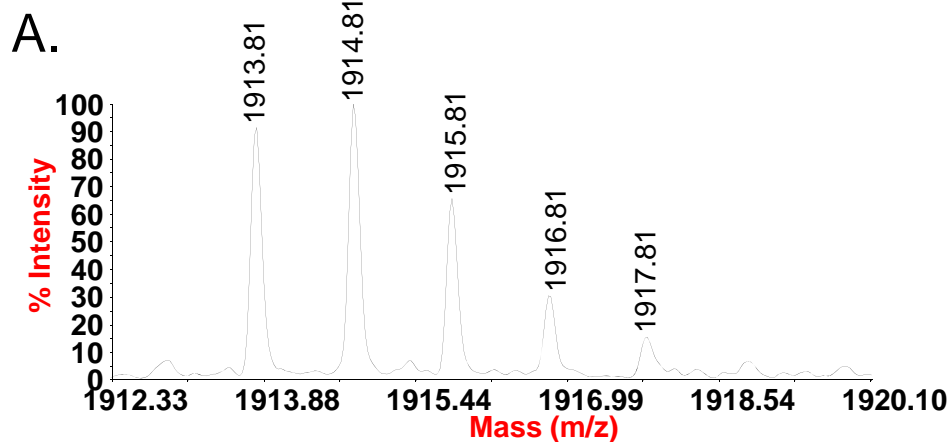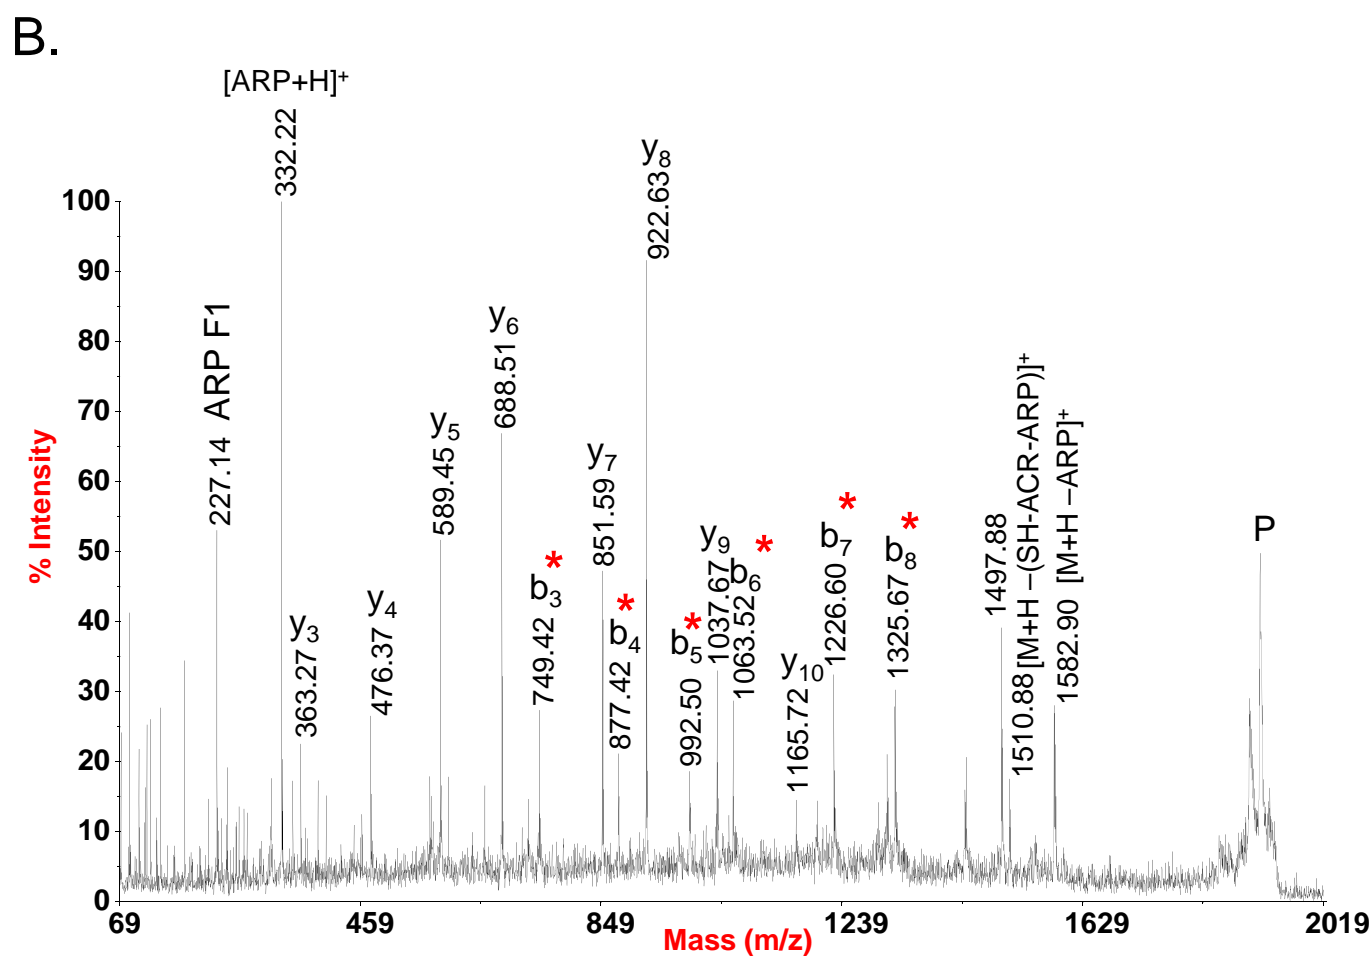

**Figure S69.** (A) Full mass spectrum and (B) MS/MS spectrum acquired by MALDI-TOF/TOF of the  $[M+H]^+$  ion of the ARP labeled, acrolein modified peptide C\*EFQDAYVLLSEK; monoisotopic  $m/z_{\text{calc}}$  1913.88; accuracy  $\Delta(m/z) = -0.07$  Da

# ACADL\_RAT: Long-chain specific acyl-CoA dehydrogenase, mitochondrial precursor

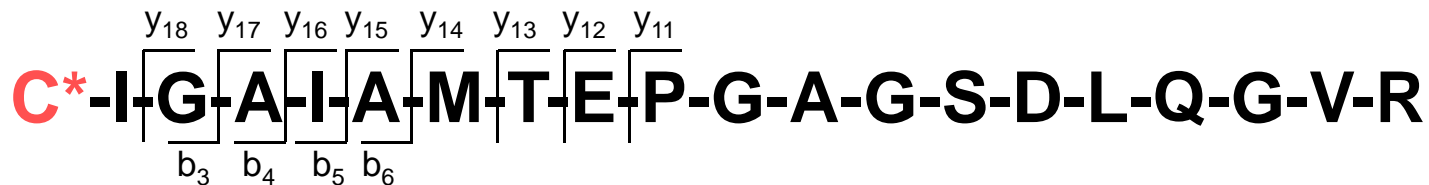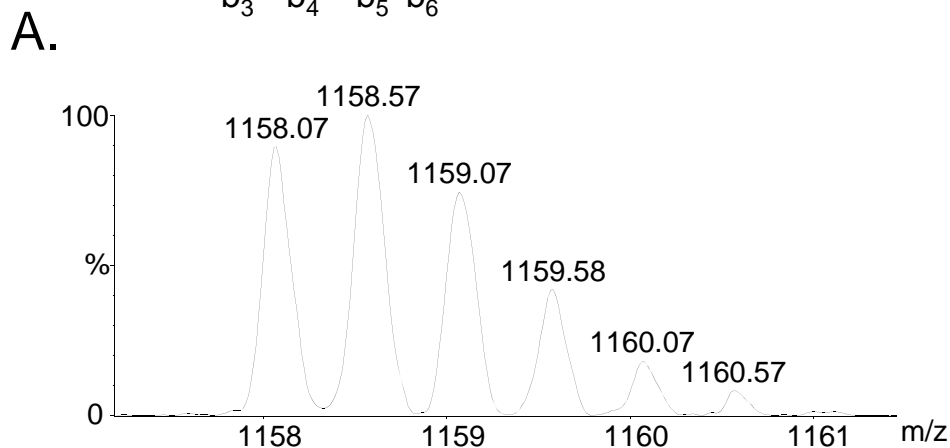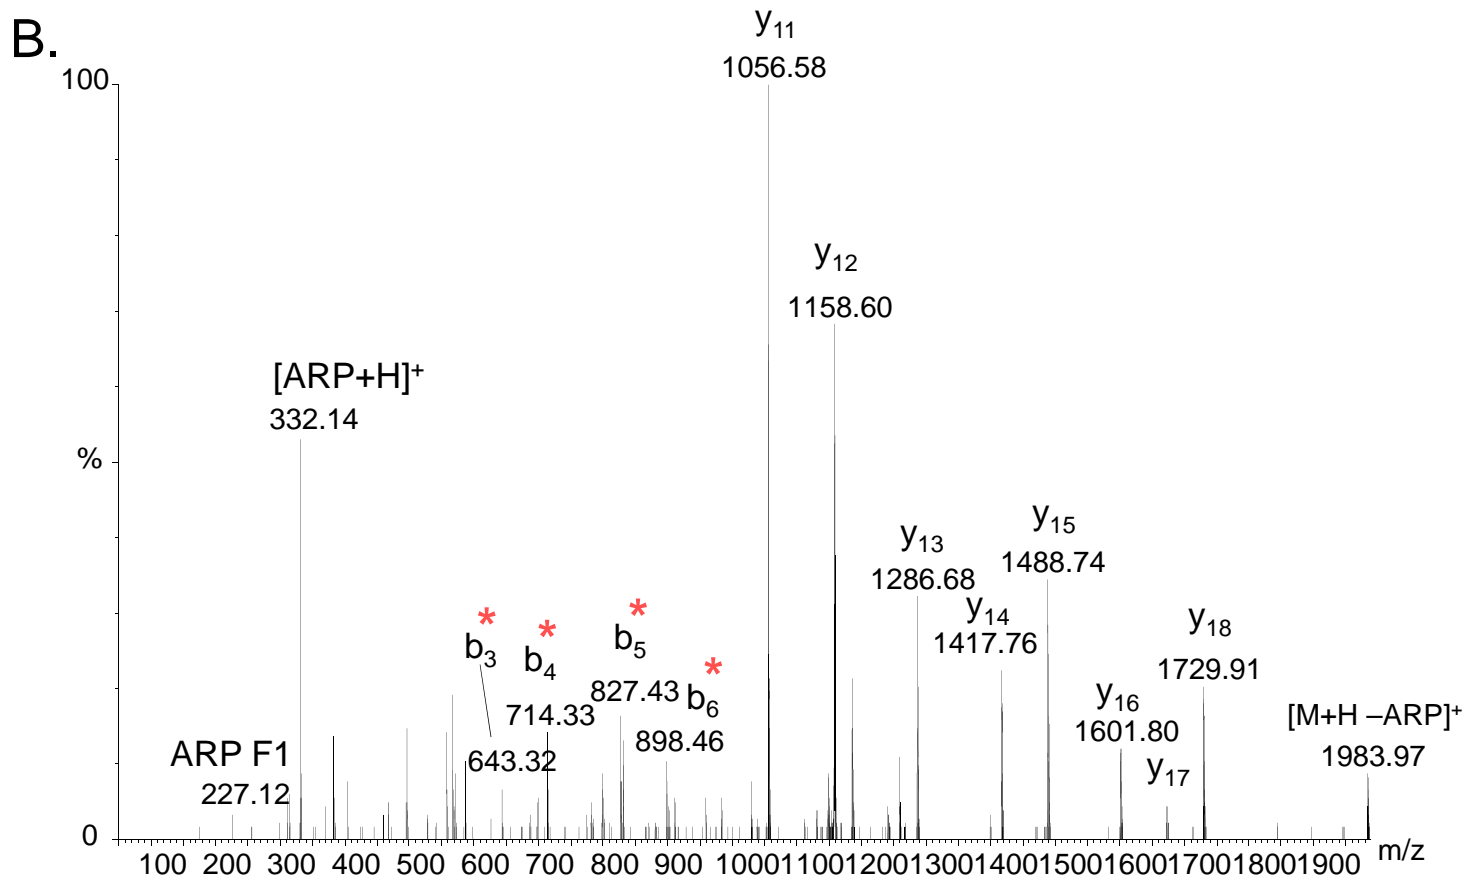

**Figure S70.** (A) Full mass spectrum and (B) MS/MS spectrum acquired by ESI-Q-TOF of the  $[M+2H]^{2+}$  ion of the ARP labeled, acrolein modified peptide C\*IGAIAMTEPGAGSDLQGV R; monoisotopic  $m/z_{\text{calc}}$  1158.05; accuracy  $\Delta(m/z) = 0.02$  Da

# ACADL\_RAT: Long-chain specific acyl-CoA dehydrogenase, mitochondrial precursor

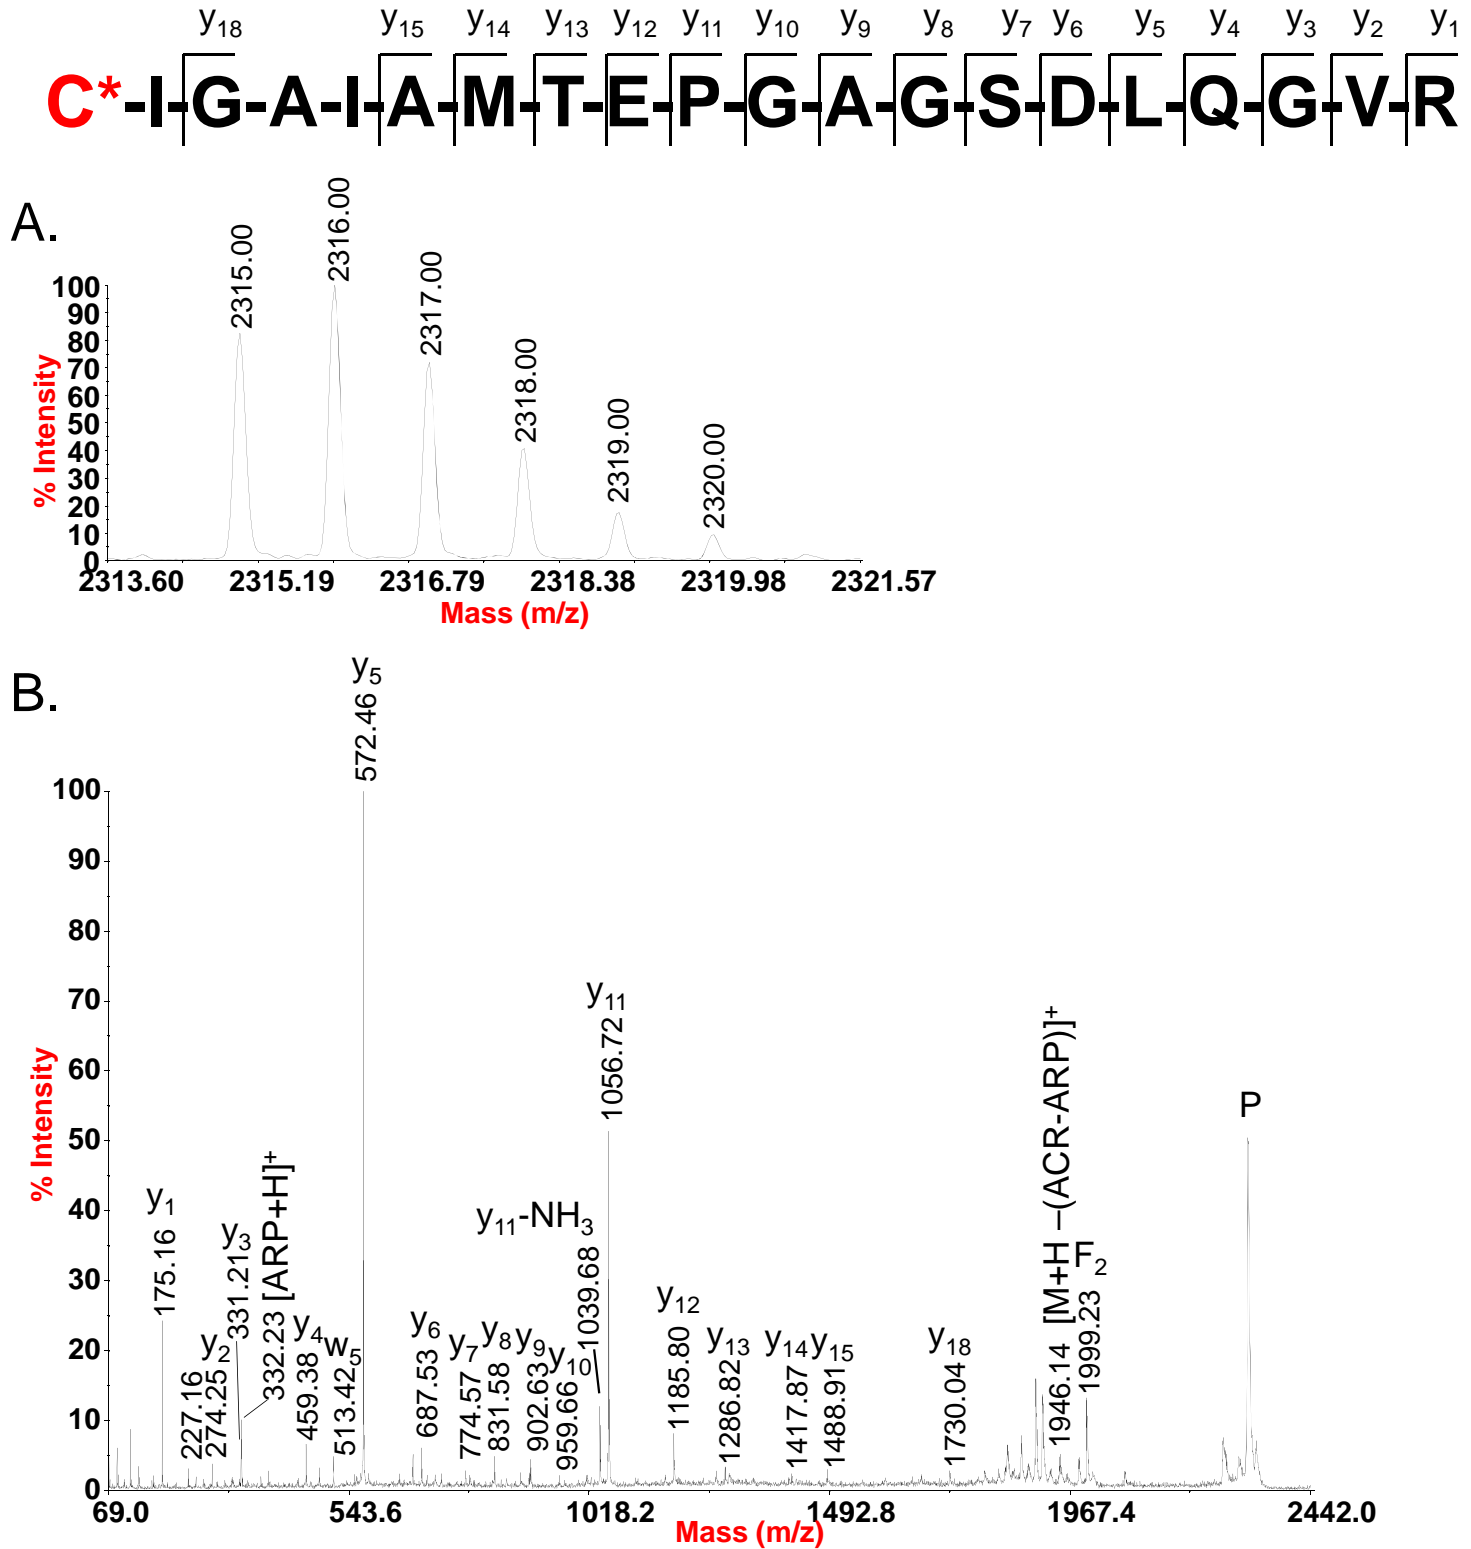

**Figure S71.** (A) Full mass spectrum and (B) MS/MS spectrum acquired by MALDI-TOF/TOF of the  $[M+H]^+$  ion of the ARP labeled, acrolein modified peptide C\*IGAIAMTEPGAGSDLQGV-R; monoisotopic  $m/z_{\text{calc}}$  2315.09; accuracy  $\Delta(m/z) = 0.01$  Da



# ACADL\_RAT: Long-chain specific acyl-CoA dehydrogenase, mitochondrial precursor

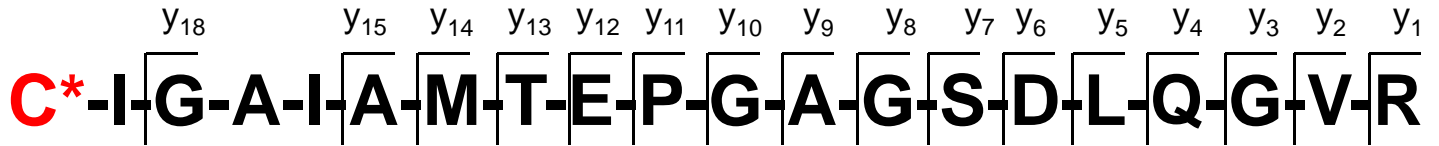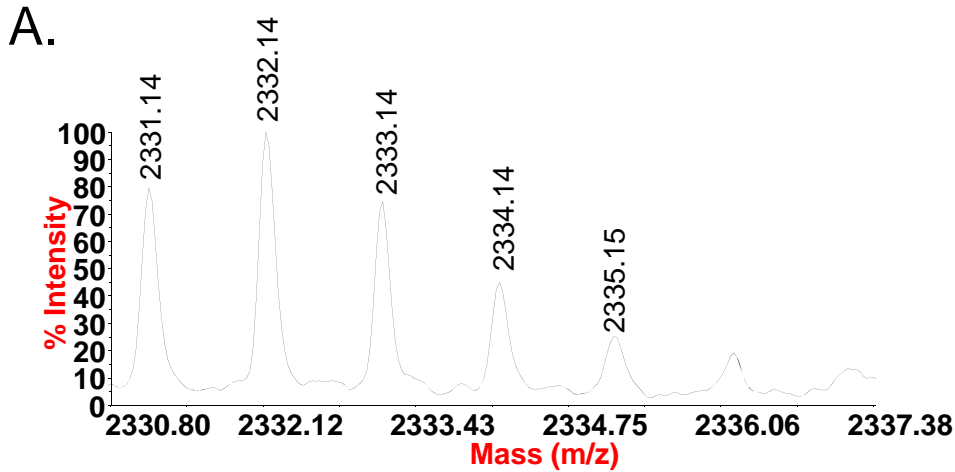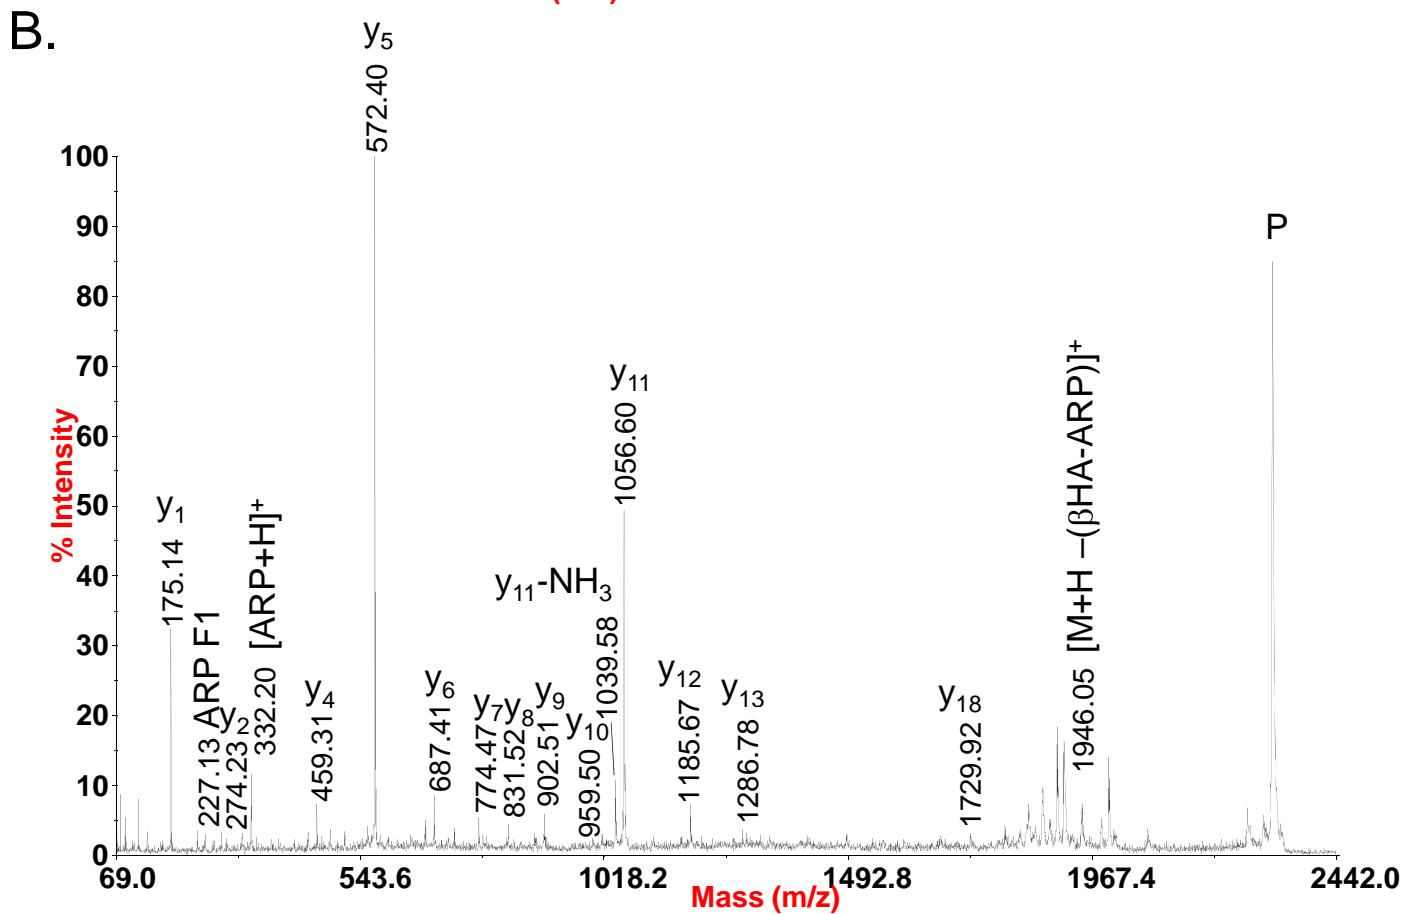

**Figure S72.** (A) Full mass spectrum and (B) MS/MS spectrum acquired by MALDI-TOF/TOF of the [M+H]<sup>+</sup> ion of the ARP labeled, beta-hydroxyacrolein modified peptide C\*IGAIAMTEPGAGSDLQGV-R; monoisotopic m/z<sub>calc</sub> 2331.09; accuracy Δ(m/z) = 0.05 Da

# ACADL\_RAT: Long-chain specific acyl-CoA dehydrogenase, mitochondrial precursor

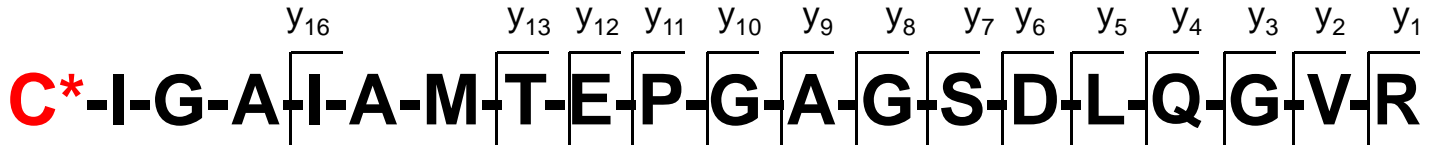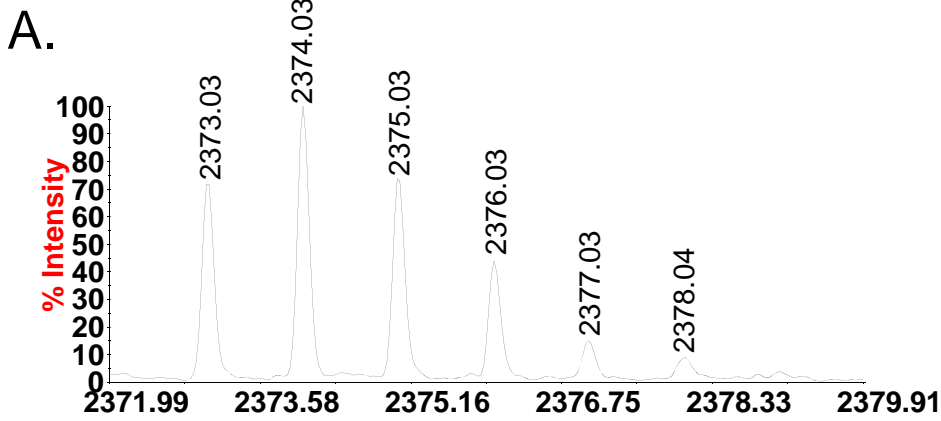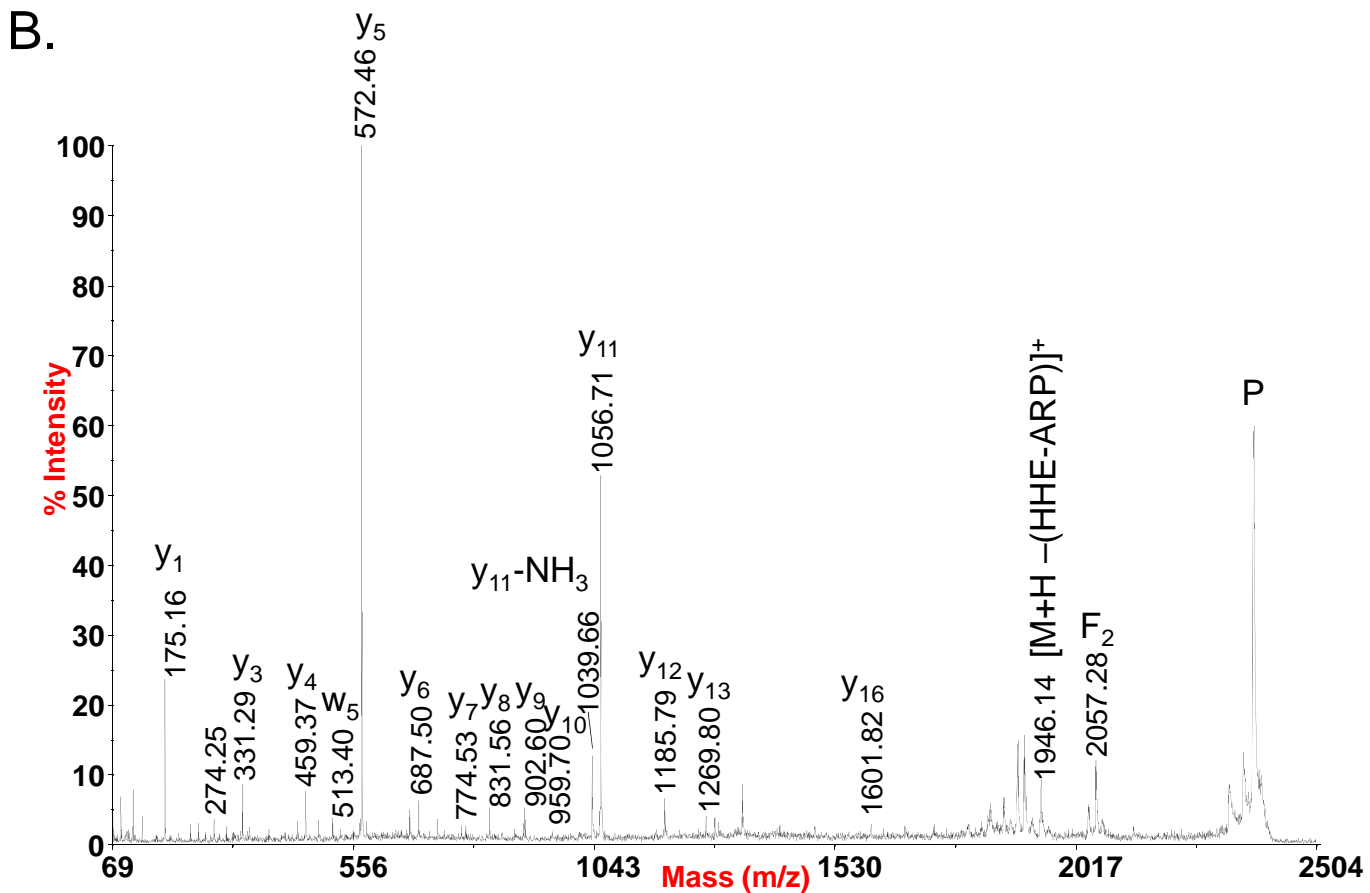

**Figure S73.** (A) Full mass spectrum and (B) MS/MS spectrum acquired by MALDI-TOF/TOF of the  $[M+H]^+$  ion of the ARP labeled, HHE modified peptide C\*IGAIAMTEPGAGSDLQGV-R; monoisotopic  $m/z_{calc}$  2373.14; accuracy  $\Delta(m/z) = -0.11$  Da

# ACADL\_RAT: Long-chain specific acyl-CoA dehydrogenase, mitochondrial precursor

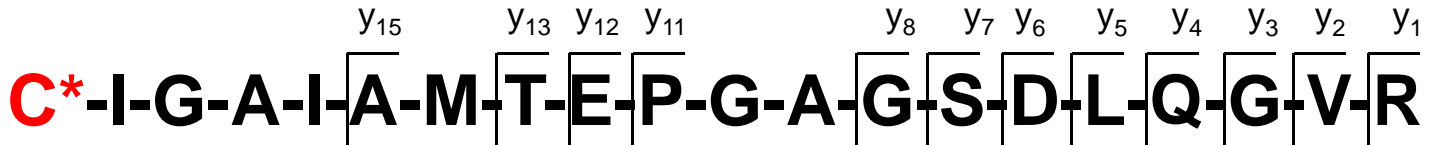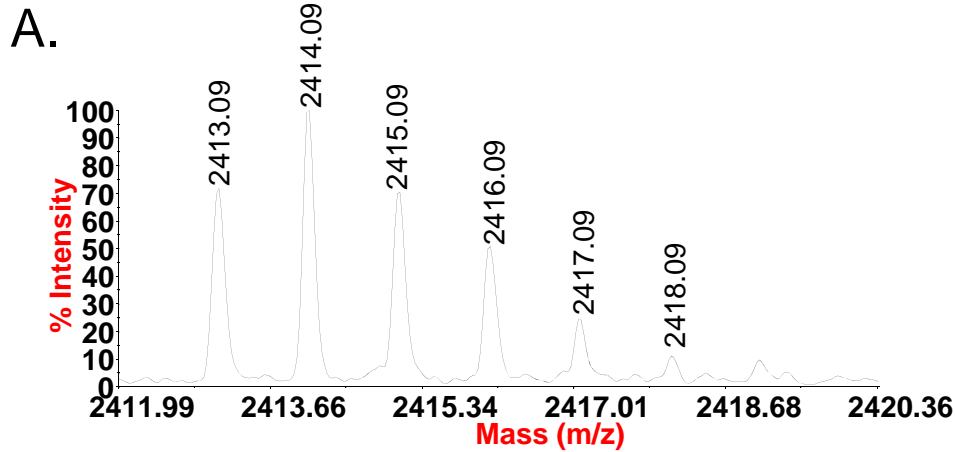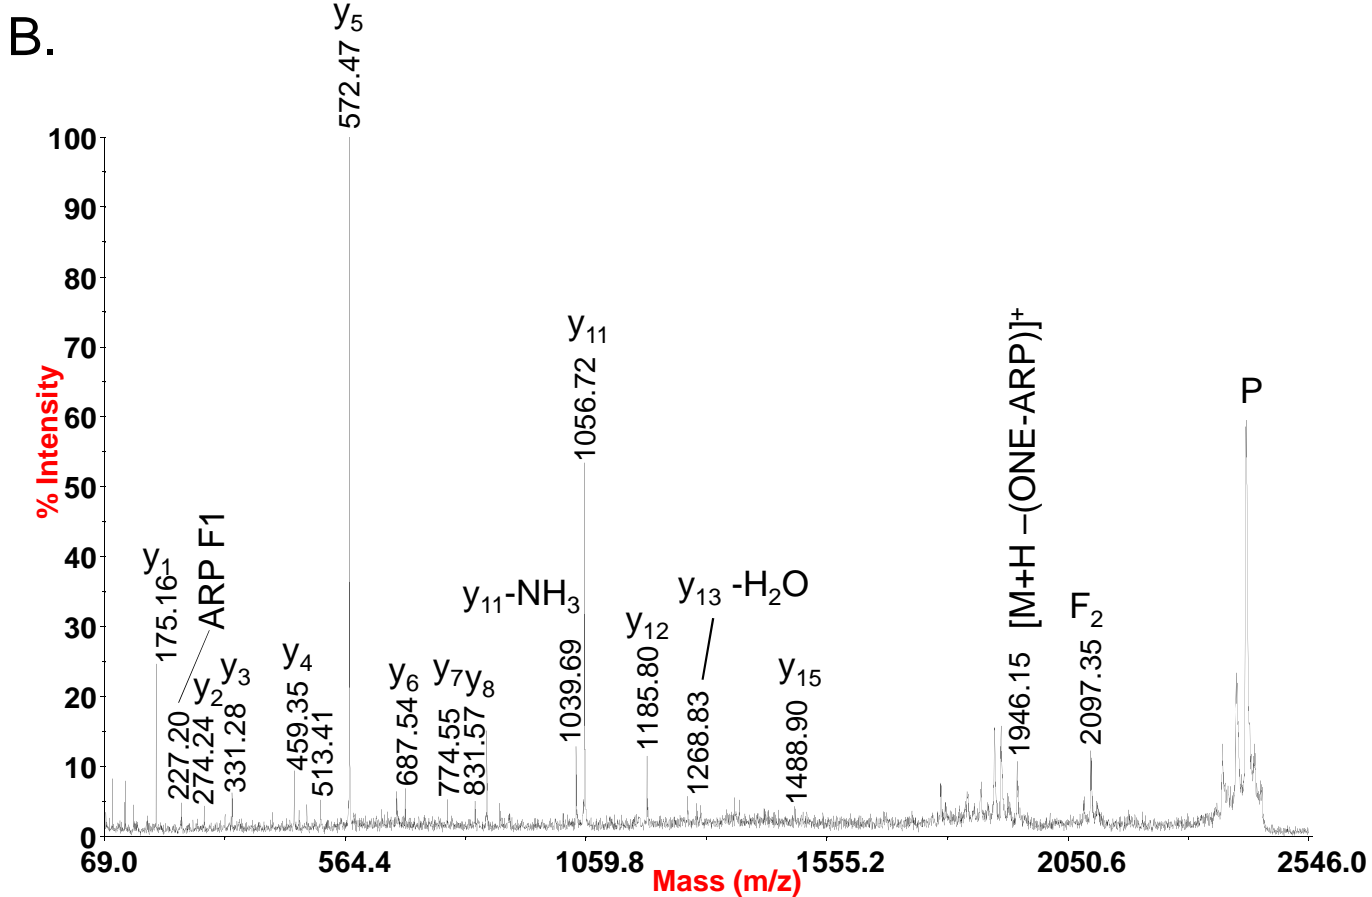

**Figure S74.** (A) Full mass spectrum and (B) MS/MS spectrum acquired by MALDI-TOF/TOF of the  $[M+H]^+$  ion of the ARP labeled, ONE modified peptide C\*IGAIAMTEPGAGSDLQGV R; monoisotopic  $m/z_{calc}$  2413.17; accuracy  $\Delta(m/z) = -0.08$  Da

# ACADL\_RAT: Long-chain specific acyl-CoA dehydrogenase, mitochondrial precursor

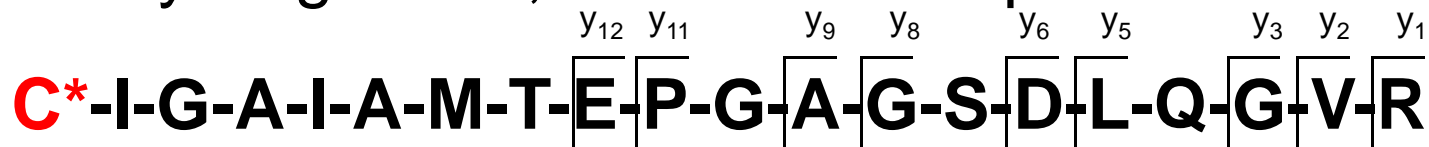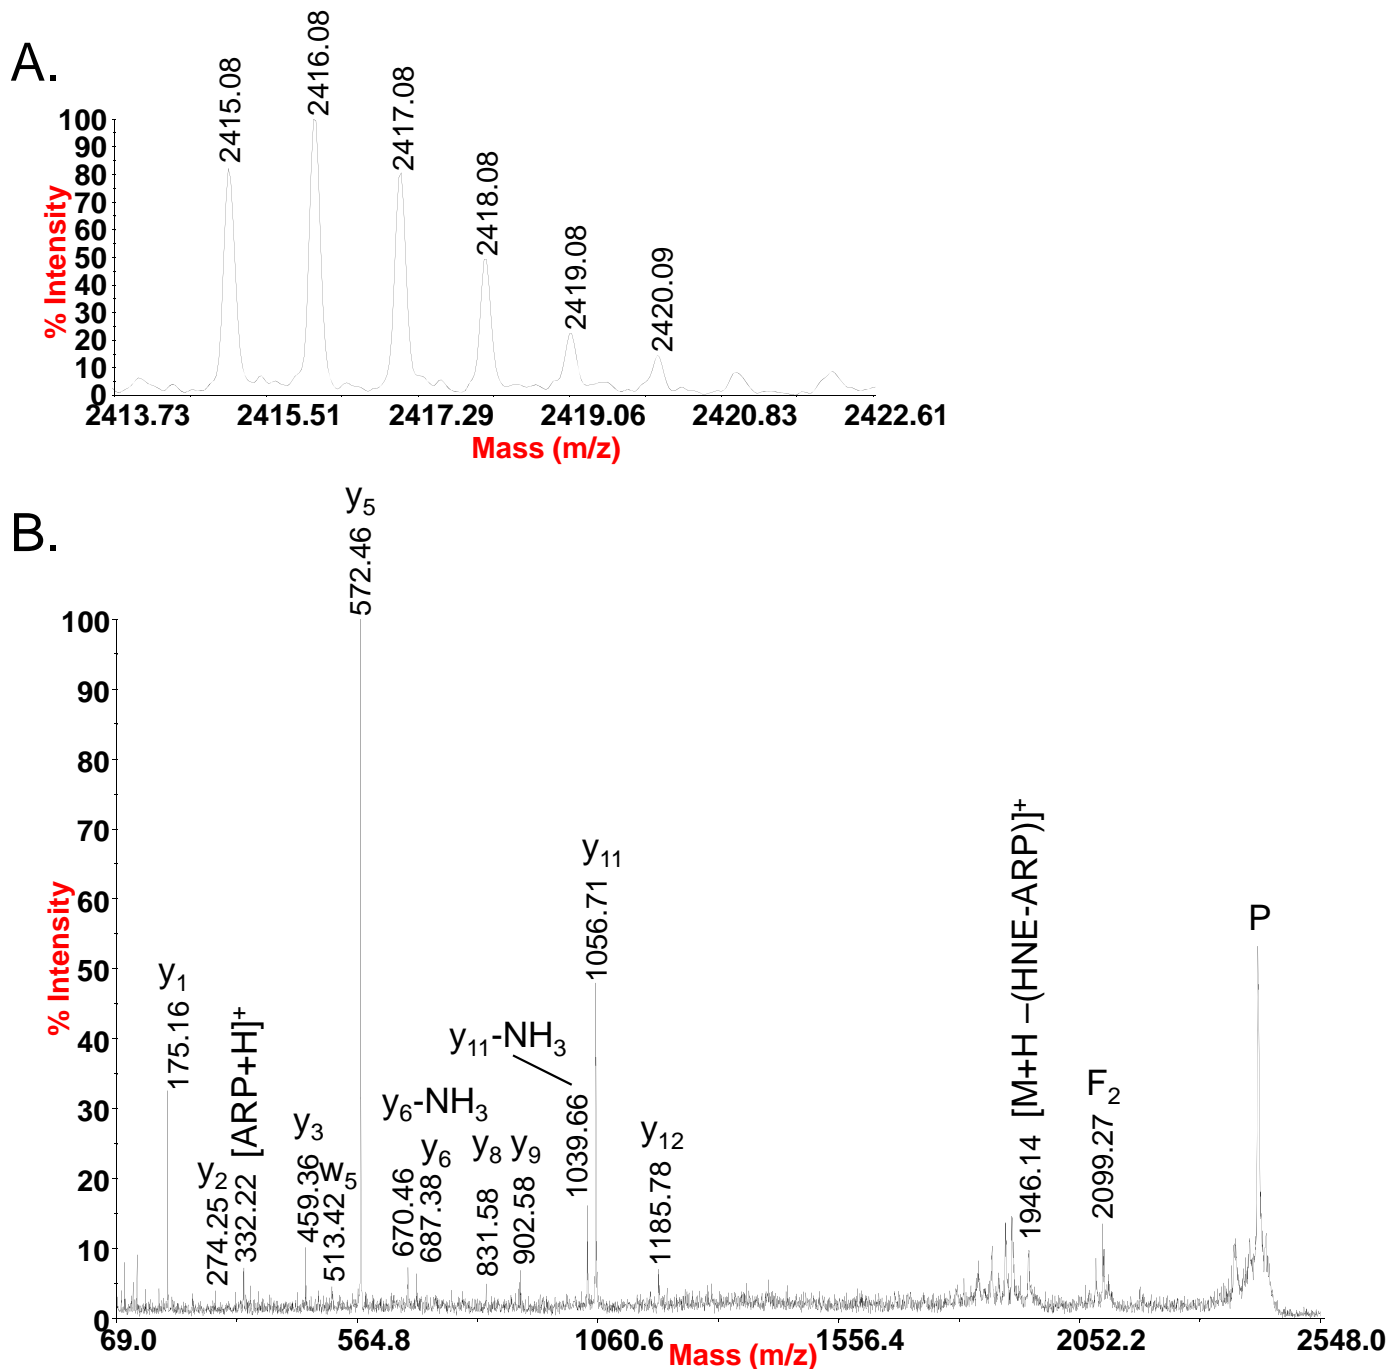

**Figure S75.** (A) Full mass spectrum and (B) MS/MS spectrum acquired by MALDI-TOF/TOF of the  $[M+H]^+$  ion of the ARP labeled, HNE modified peptide C\*IGAIAMTEPGAGSDLQGV R; monoisotopic  $m/z_{\text{calc}}$  2415.18; accuracy  $\Delta(m/z) = -0.10$  Da

# KCRB\_RAT: Creatine kinase B-type

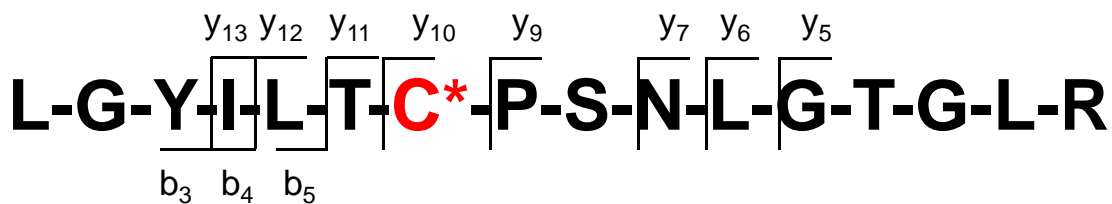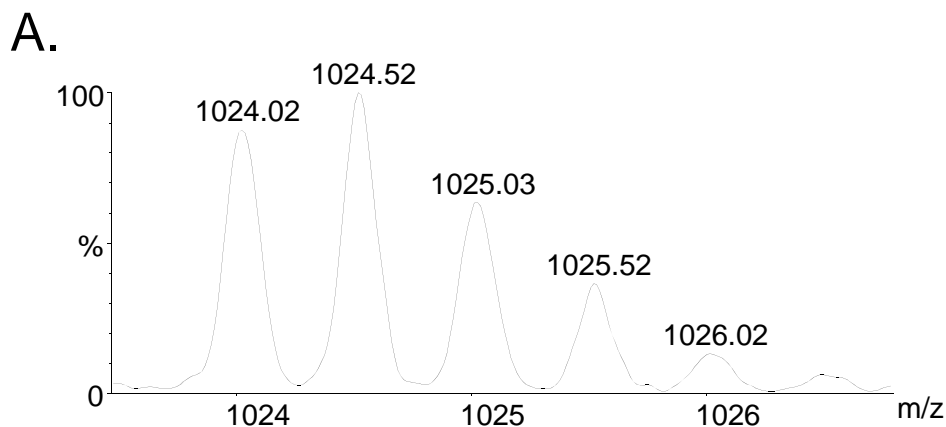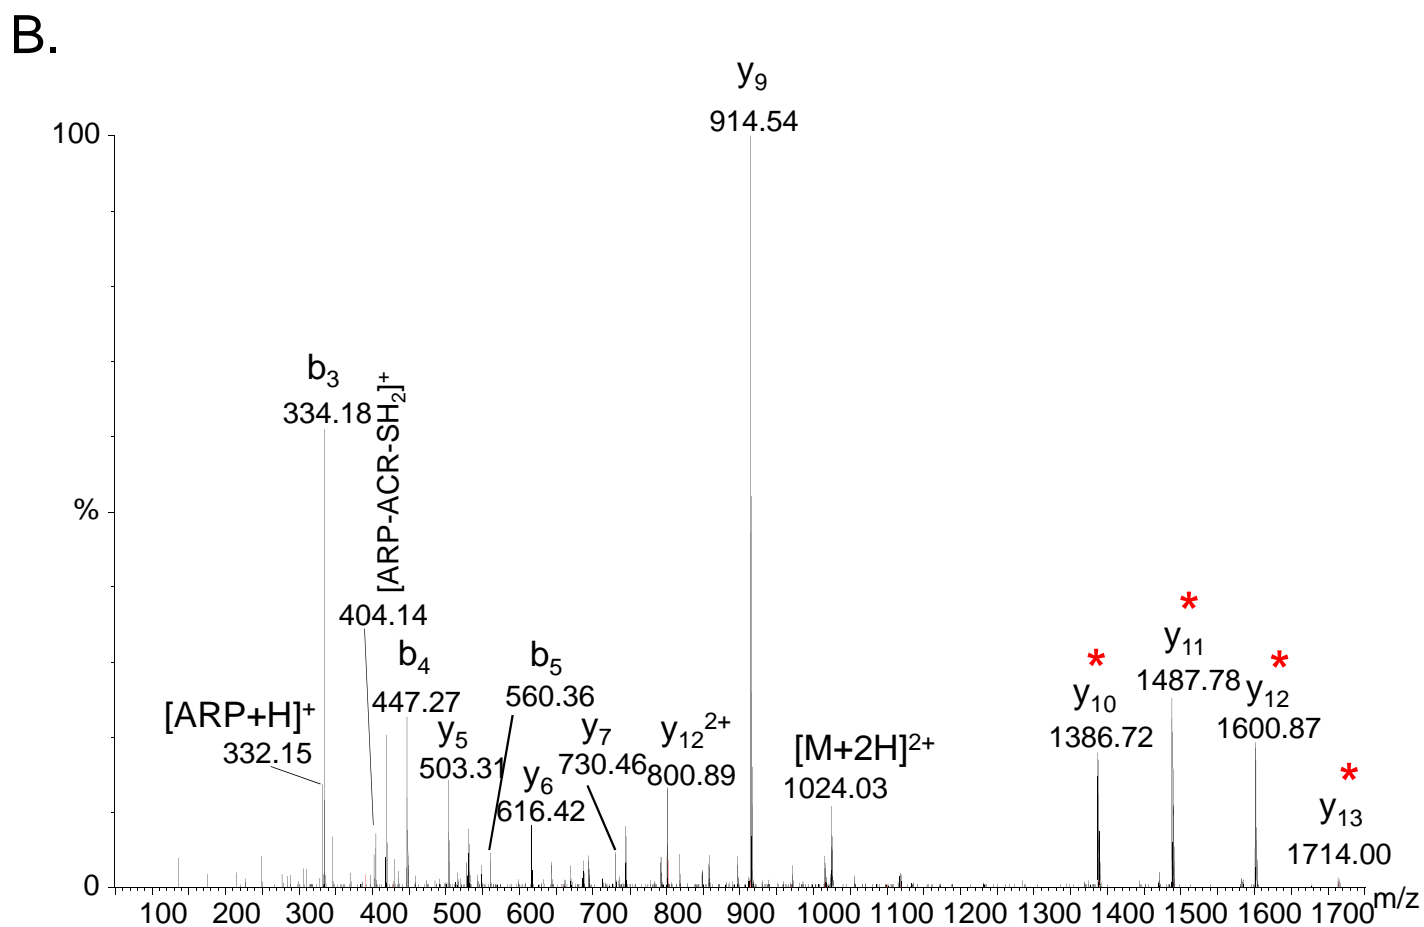

**Figure S76.** (A) Full mass spectrum and (B) MS/MS spectrum acquired by ESI-Q-TOF of the [M+2H]<sup>2+</sup> ion of the ARP labeled, acrolein modified peptide LGYILTC\*PSNLGTGLR; monoisotopic m/z<sub>calc</sub> 1024.03; accuracy  $\Delta(m/z) = -0.01$  Da

# KCRB\_RAT: Creatine kinase B-type

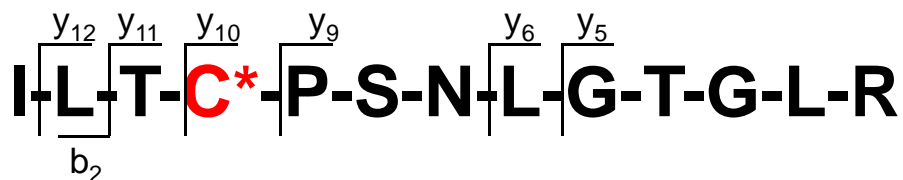

A.

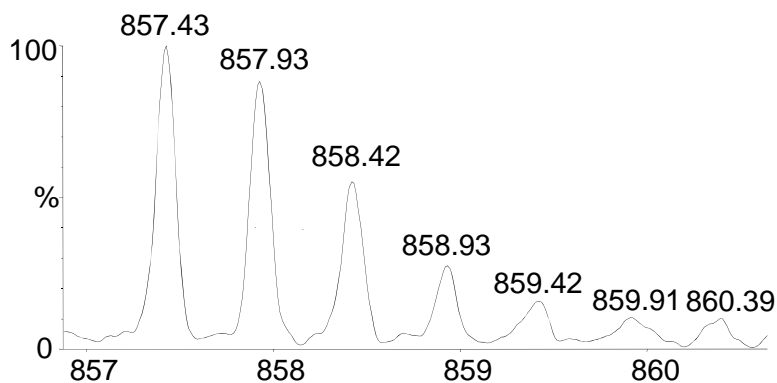

B.

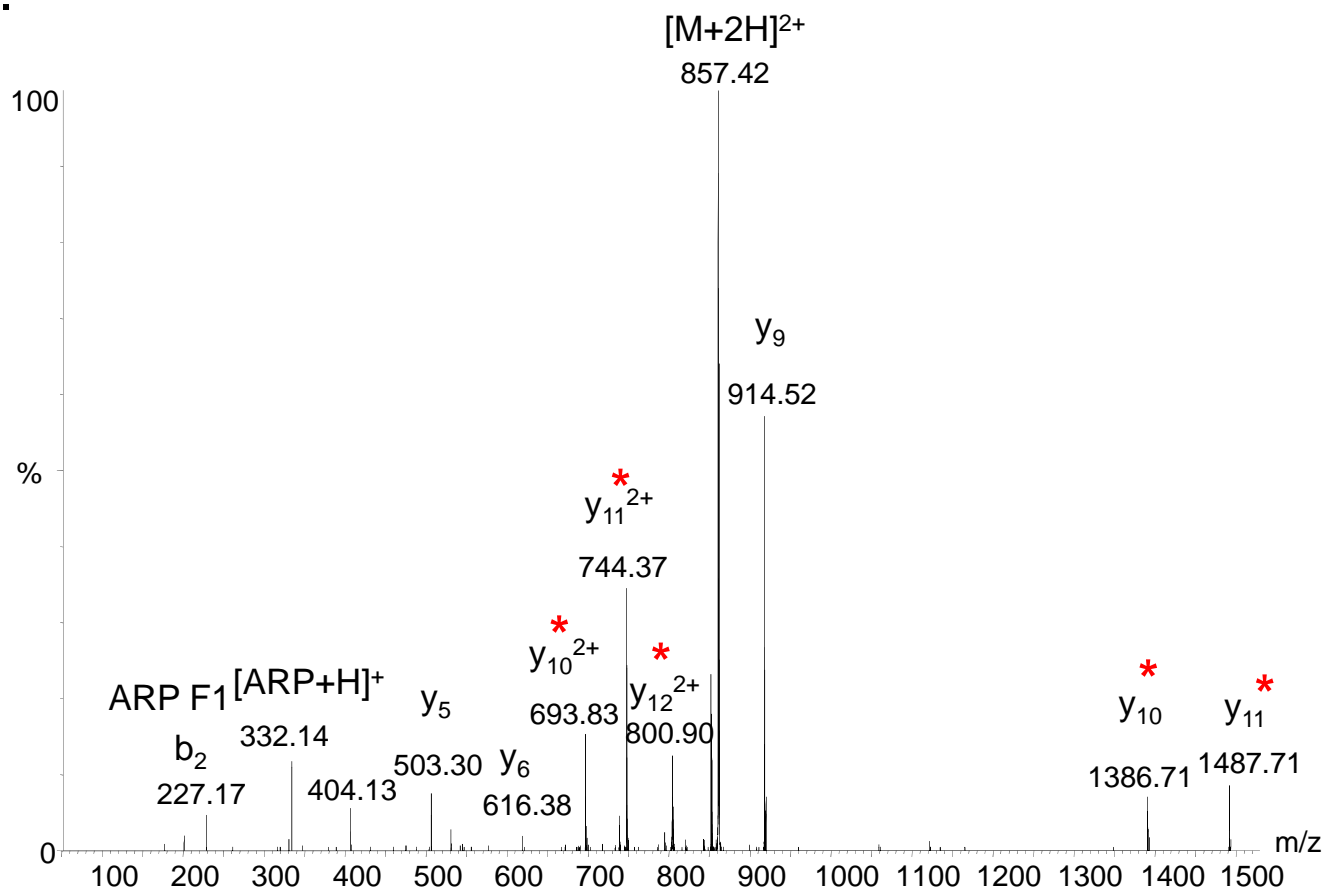

**Figure S77.** (A) Full mass spectrum and (B) MS/MS spectrum acquired by ESI-Q-TOF of the  $[M+2H]^{2+}$  ion of the ARP labeled, acrolein modified peptide ILTC\*PSNLGTGLR; monoisotopic  $m/z_{calc}$  857.44; accuracy  $\Delta(m/z) = -0.01$  Da

# Observed ARP related neutral losses

## ARP-HNE modified Cys

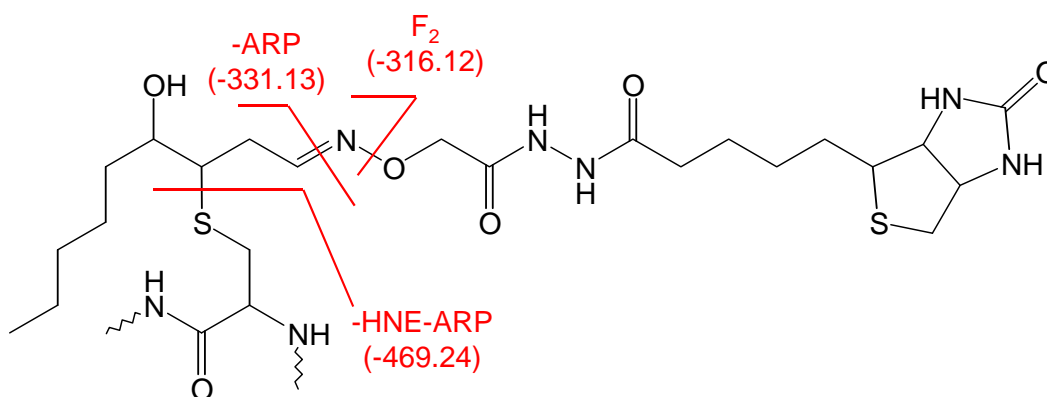

# Observed ARP related fragment ions

## ARP F1 (227.09 Da)

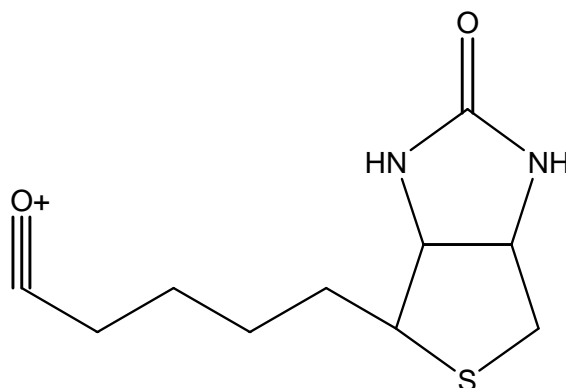

## [ARP+H]<sup>+</sup> (332.14 Da)

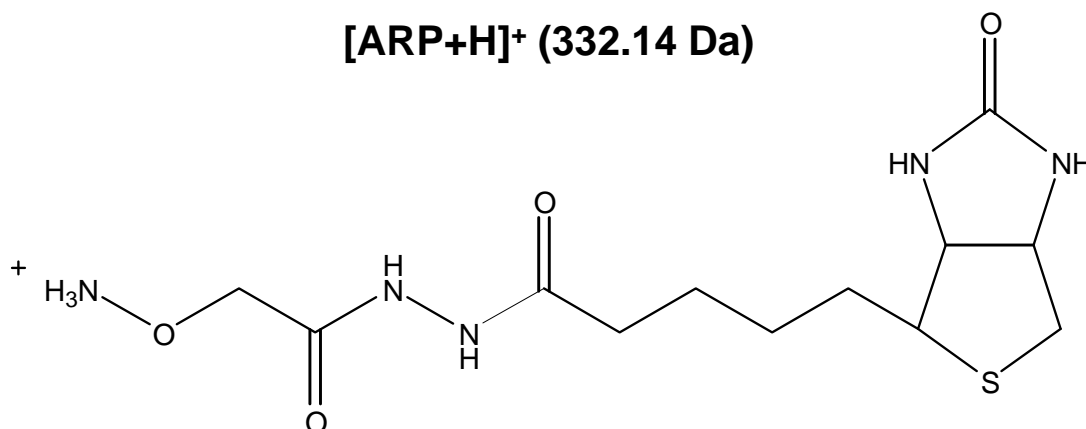

**Figure S78.** (A) Structure of ARP-HNE modified Cys, indicating the various neutral losses observed in CID MS/MS experiments. (B) Fragment ions generated by the ARP tag in CID MS/MS experiments
